# Supplementary material for: Diversity-oriented synthesis of benzofuro[3,2-b]pyridine derivatives from aurone-derived α,β-unsaturated imines and activated terminal alkynes
Source: Royal Society of Chemistry journal article supplement (doi:10.1039/d1cc02477a), 2021-01-01

# Diversity-oriented synthesis of benzofuro[3,2-*b*]pyridine derivatives from aurone-derived $\alpha,\beta$ -unsaturated imines and activated terminal alkynes

Bin Cheng,<sup>\*ab</sup> Hui Li,<sup>ab†</sup> Xuecheng Zhu,<sup>ab†</sup> Xinping Zhang,<sup>ab</sup> Yixuan He,<sup>ab</sup> Haiyan Sun,<sup>a</sup> Taimin Wang,<sup>\*a</sup> and Hongbin Zhai<sup>\*ac</sup>

<sup>a.</sup> Institute of Marine Biomedicine/Hoffmann Institute of Advanced Materials, Shenzhen Polytechnic, Shenzhen 518055, China; e-mail: chengbin@szpt.edu.cn, wangtm@szpt.edu.cn

<sup>b.</sup> State Key Laboratory of Applied Organic Chemistry, College of Chemistry and Chemical Engineering, Lanzhou University, Lanzhou 730000, China

<sup>c.</sup> State Key Laboratory of Chemical Oncogenomics, Shenzhen Engineering Laboratory of Nano Drug Slow-Release, Peking University Shenzhen Graduate School, Shenzhen 518055, China; e-mail:zhaihb@pkusz.edu.cn

<sup>†</sup> These authors contributed equally to this work

## List of contents

|                                                                    |                |
|--------------------------------------------------------------------|----------------|
| <b>1. General Information</b> .....                                | <b>S2</b>      |
| <b>2. Experimental Procedure</b> .....                             | <b>S2–S5</b>   |
| <b>3. References</b> .....                                         | <b>S5</b>      |
| <b>4. Optimization Conditions</b> .....                            | <b>S6–S9</b>   |
| <b>5. Proposed mechanisms for the Formation of 3a and 4a</b> ..... | <b>S10</b>     |
| <b>6. Characterization Data</b> .....                              | <b>S11–S23</b> |
| <b>7. NMR Spectra</b> .....                                        | <b>S24–S65</b> |

## 1. General Information

All isolated compounds were characterized on JEOL 400 MHz spectrometer in CDCl<sub>3</sub>. Chemical shifts were reported as  $\delta$  values relative to internal chloroform ( $\delta$  7.26 for <sup>1</sup>H NMR and 77.16 for <sup>13</sup>C NMR). <sup>19</sup>F NMR chemical shifts were determined as  $\delta$  values relative to external standard PhCF<sub>3</sub> at -63.0. High-resolution mass spectra (HRMS) were obtained on a 4G mass spectrometer using electrospray ionization (ESI) analyzed by a quadrupole time-of-flight (QToF). All melting points were measured with the samples after column chromatography and uncorrected. Column chromatography was performed on silica gel. All solvents and reagents were used as obtained from commercial sources without further purification. Azadienes were all known and prepared according to the literature.<sup>1</sup>

## 2. Experimental Procedure

### (1) General Procedure for the Synthesis of Azadienes 1

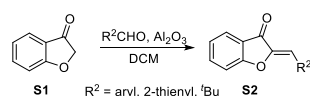

**Step 1:** To a solution of benzofuran-3(2*H*)-one (**S1**, 4 mmol) and aldehyde (8 mmol, 2.0 equiv) in dichloromethane (30 mL) was added basic aluminium oxide (13 g). The mixture was violently stirred at room temperature under argon atmosphere. After completion of the condensation reaction as monitored by TLC, the suspension was filtered off and the residue was washed with dichloromethane. The filtrates were combined and concentrated. The resulting residue was purified by silica gel column chromatography to afford the corresponding aurone **S2**.

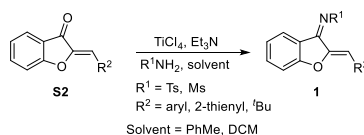

**Step 2:** To a solution of sulfamide (4.5 mmol, 1.5 equiv) and aurone **S2** (3.0 mmol) in toluene (40 mL) at 0 °C were added successively Et<sub>3</sub>N (0.84 mL, 6.0 mmol, 2.0 equiv) and TiCl<sub>4</sub> (1.0 M in toluene, 3.6 mmol, 1.2 equiv). The reaction mixture was heated to reflux overnight. It was cooled to room temperature, quenched with icy water and extracted with DCM. The combined organic phases were combined, dried over Na<sub>2</sub>SO<sub>4</sub>, and concentrated. The residue was purified by silica gel column chromatography to afford the corresponding azadiene **1**. When R<sup>2</sup> was <sup>t</sup>Bu group, DCM as the solvent and heating at 45 °C was adopted instead.

### (2) General procedure for the synthesis of 1,4-dihydrobenzofuro[3,2-*b*]pyridines 3a–3p

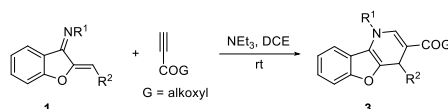

To a solution of aurone-derived  $\alpha,\beta$ -unsaturated imine **1** (0.2 mmol, 1.0 equiv) in DCE (2 mL) were

added terminal alkyne (0.24 mmol, 1.2 equiv) and  $\text{NEt}_3$  (0.24 mmol, 1.2 equiv), and then the mixture was stirred at rt. After completion of the annulation reaction as monitored by TLC, the solvent was evaporated and the resulting residue was purified directly by silica gel column chromatography to afford the corresponding 1,4-dihydrobenzofuro[3,2-*b*]pyridines **3a–3p**. For the synthesis of **3i**, **3k**, and **3p**, the terminal alkyne (0.2 mmol, 1.0 equiv) was added first and another portion of terminal alkyne (0.2 mmol, 1.0 equiv) was added after 4 h.

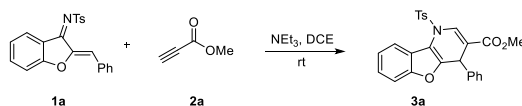

**Scale-up experiment of 3a:** To a solution of aurone-derived  $\alpha,\beta$ -unsaturated imine **1a** (1.0 g, 2.66 mmol, 1.0 equiv) in DCE (27 mL) were added methyl propiolate **2a** (0.28 mL, 3.2 mmol, 1.2 equiv) and  $\text{NEt}_3$  (4.4 mL, 3.2 mmol, 1.2 equiv), and then the mixture was stirred at rt. After completion of the annulation reaction as monitored by TLC, the solvent was evaporated and the resulting residue was purified directly by silica gel column chromatography to afford **3a** (880 mg, 72%) as a yellow solid.

### (3) General procedure for the synthesis of 1,4-dihydrobenzofuro[3,2-*b*]pyridines **3q–3t**

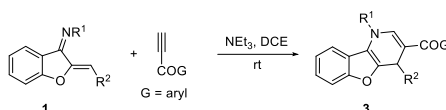

To a solution of aurone-derived  $\alpha,\beta$ -unsaturated imine **1** (0.2 mmol, 1.0 equiv) in DCE (2 mL) were added terminal alkyne (0.4 mmol, 2.0 equiv) and  $\text{NEt}_3$  (0.24 mmol, 1.2 equiv), and then the mixture was stirred at rt. After completion of the annulation reaction as monitored by TLC, the solvent was evaporated and the resulting residue was purified directly by silica gel column chromatography to afford the corresponding 1,4-dihydrobenzofuro[3,2-*b*]pyridines **3q–3t**. For the synthesis of **3s**, the terminal alkyne (0.4 mmol, 2.0 equiv) was added first and another portion of terminal alkyne (0.2 mmol, 1 equiv) was added after 4 h.

### (4) General procedure for the synthesis of 1,4-dihydrobenzofuro[3,2-*b*]pyridines **4a–4f**

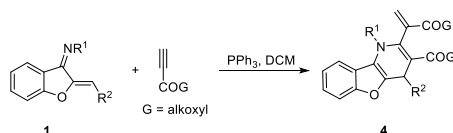

To a solution of aurone-derived  $\alpha,\beta$ -unsaturated imine **1** (0.2 mmol, 1.0 equiv) in DCM (3 mL) were added terminal alkyne (0.6 mmol, 3.0 equiv) and  $\text{PPh}_3$  (0.2 mmol, 1.0 equiv), then the mixture was stirred at rt. After completion of the annulation reaction as monitored by TLC, the solvent was evaporated and the resulting residue was purified by silica gel column chromatography to afford the corresponding 1,4-dihydrobenzofuro[3,2-*b*]pyridines (**4a–4f**).

### (5) General procedure for the synthesis of benzofuro[3,2-*b*]pyridines 5a–5l

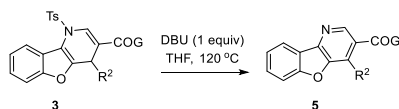

To a solution of 1,4-dihydrobenzofuro[3,2-*b*]pyridine **3** (0.12 mmol, 1.0 equiv) in THF (1.5 mL) was added DBU (0.12 mmol, 1.0 equiv), and then the mixture was stirred at 120 °C. After completion of the aromatization reaction as monitored by TLC, the solvent was evaporated and the resulting residue was purified directly by silica gel column chromatography to afford the corresponding benzofuro[3,2-*b*]pyridines **5a–5l**.

### (6) General procedure for the synthesis of benzofuro[3,2-*b*]pyridines 6a–6c

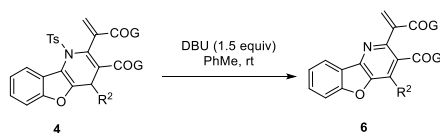

To a solution of 1,4-dihydrobenzofuro[3,2-*b*]pyridine **4** (0.2 mmol, 1.0 equiv) in PhMe (2 mL) was added DBU (0.3 mmol, 1.5 equiv), and then the mixture was stirred at rt. After completion of the aromatization reaction as monitored by TLC, the solvent was evaporated and the resulting residue was purified directly by silica gel column chromatography to afford the corresponding benzofuro[3,2-*b*]pyridines **6a–6c**.

### (7) One-pot synthesis of benzofuro[3,2-*b*]pyridine 6a

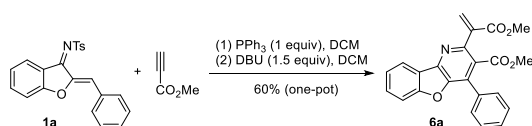

To a solution of aurone-derived  $\alpha,\beta$ -unsaturated imine **1a** (113 mg, 0.3 mmol, 1.0 equiv) in DCM (3 mL) were added methyl propiolate (0.08 mL, 0.9 mmol, 3.0 equiv) and PPh<sub>3</sub> (79 mg, 0.3 mmol, 1.0 equiv), and then the mixture was stirred at rt. After completion of the first step as monitored by TLC, DBU (68 mg, 0.45 mmol, 1.5 equiv) was added directly into the mixture. After an hour, the solvent was evaporated and the resulting residue was purified directly by silica gel column chromatography to afford **6a** (70 mg, 60%) as a yellow oil.

### (8) Synthesis of benzofuro[3,2-*b*]pyridine **7a**

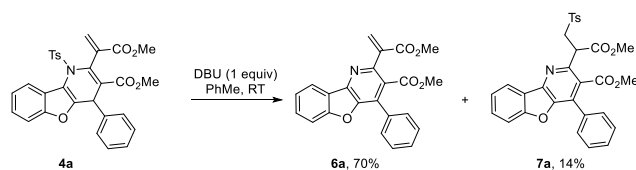

To a solution of 1,4-dihydrobenzofuro[3,2-*b*]pyridine **4a** (0.2 mmol, 1.0 equiv) in PhMe (2 mL) was added DBU (0.2 mmol, 1.0 equiv), and then the mixture was stirred at rt. After completion of the reaction as monitored by TLC, the solvent was evaporated and the resulting residue was purified by silica gel column chromatography to afford **6a** (54 mg, 70%) and **7a** (15 mg, 14%).

### 3. References

- (a) M. Espinosa, G. Blay, L. Cardona and J. R. Pedro, *Chem. Eur. J.*, 2013, **19**, 14861; (b) H. Ni, X. Tang, W. Zheng, W. Yao, N. Ullah and Y. Lu, *Angew. Chem. Int. Ed.*, 2017, **56**, 14222; (c) K. Verma and P. Banerjee, *Adv. Synth. Catal.*, 2018, **360**, 3687; (d) B. M. Trost and Z. Zuo, *Angew. Chem. Int. Ed.*, 2020, **59**, 1243.

#### 4. Optimization Conditions

**Table S1** Optimization of the reaction conditions for the formation of **3a**.<sup>a</sup>

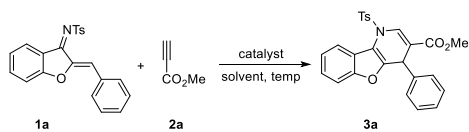

| Entry          | <b>1a:2a:</b><br>Initiator | Initiator                       | Solvent            | Temp        | Time (h)            | <b>3a</b><br>Yield (%) <sup>b</sup> |
|----------------|----------------------------|---------------------------------|--------------------|-------------|---------------------|-------------------------------------|
| 1              | 1:3:3                      | NEt <sub>3</sub>                | DCE                | rt          | 2                   | 72 <sup>d</sup>                     |
| 2              | 1:3:0                      | -                               | DCE                | rt to 80 °C | 24 (rt); 24 (80 °C) | NP                                  |
| 3              | 1:1.5:1.5                  | NEt <sub>3</sub>                | DCE                | rt          | 2                   | 83                                  |
| 4              | 1:1.5:0.2                  | NEt <sub>3</sub>                | DCE                | rt          | 16                  | 82                                  |
| <b>5</b>       | <b>1:1.2:1.2</b>           | <b>NEt<sub>3</sub></b>          | <b>DCE</b>         | <b>rt</b>   | <b>3</b>            | <b>83 (75)<sup>d</sup></b>          |
| 6              | 1:1.2:1.2                  | DABCO                           | DCE                | rt to 80 °C | 24 (rt); 24 (80 °C) | NP                                  |
| 7 <sup>c</sup> | 1:1.2:1.2                  | PPh <sub>3</sub>                | DCE                | rt          | 24                  | NP                                  |
| 8              | 1:1.2:1.2                  | DMAP                            | DCE                | rt          | 24                  | NP                                  |
| 9              | 1:1.2:1.2                  | CsF                             | DCE                | rt to 60 °C | 24 (rt); 24 (60 °C) | NP                                  |
| 10             | 1:1.2:1.2                  | DBU                             | DCE                | rt          | 24                  | NP                                  |
| 11             | 1:1.2:1.2                  | Cs <sub>2</sub> CO <sub>3</sub> | DCE                | rt          | 24                  | NP                                  |
| 12             | 1:1.2:1.2                  | NEt <sub>3</sub>                | CH <sub>3</sub> CN | rt          | 2                   | 31                                  |
| 13             | 1:1.2:1.2                  | NEt <sub>3</sub>                | Dioxane            | rt          | 36                  | 36                                  |
| 14             | 1:1.2:1.2                  | NEt <sub>3</sub>                | THF                | rt          | 22                  | 42                                  |
| 15             | 1:1.2:1.2                  | NEt <sub>3</sub>                | CHCl <sub>3</sub>  | rt          | 24                  | NP                                  |
| 16             | 1:1.2:1.2                  | NEt <sub>3</sub>                | DMF                | rt          | 1.5                 | 53                                  |
| 17             | 1:1.2:1.2                  | NEt <sub>3</sub>                | Acetone            | rt          | 24                  | 10                                  |

<sup>a</sup> Reaction conditions: **1a** (0.2 mmol), **2a** and initiator in solvent (2 mL) in air.

<sup>b</sup> The yield was determined by <sup>1</sup>H-NMR spectra using 1,3,5-trimethoxybenzene as the internal standard.

<sup>c</sup> **4a** was obtained instead.

<sup>d</sup> Isolated yield

**Table S2** Optimization of the reaction conditions for the formation of **4a**.<sup>a</sup>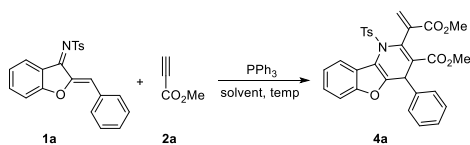

| Entry           | <b>1a</b> : <b>2a</b> :<br>Initiator | Initiator        | Solvent           | Temp        | Time (h)            | <b>4a</b><br>Yield (%) <sup>b</sup> |
|-----------------|--------------------------------------|------------------|-------------------|-------------|---------------------|-------------------------------------|
| 1               | 1:3:2                                | PPh <sub>3</sub> | DCE               | rt to 50 °C | 24 (rt), 24 (50 °C) | 54                                  |
| 2               | 1:3:2                                | PPh <sub>3</sub> | DCE               | 50 °C       | 2                   | 62                                  |
| 3               | 1:3:2                                | PPh <sub>3</sub> | DCM               | rt          | 1                   | 72 <sup>d</sup>                     |
| 4               | 1:3:2                                | PPh <sub>3</sub> | DMF               | rt          | 2                   | 63                                  |
| 5               | 1:3:2                                | PPh <sub>3</sub> | MeCN              | rt          | 1                   | 56                                  |
| 6               | 1:3:2                                | PPh <sub>3</sub> | Toluene           | rt to 50 °C | 24 (rt), 24 (50 °C) | 13                                  |
| 7               | 1:3:2                                | PPh <sub>3</sub> | CHCl <sub>3</sub> | rt to 50 °C | 24 (rt), 24 (50 °C) | ND                                  |
| 8               | 1:3:2                                | PPh <sub>3</sub> | MeOH              | rt          | 5                   | 35                                  |
| 9               | 1:3:2                                | PPh <sub>3</sub> | Acetone           | rt to 50 °C | 24 (rt), 24 (50 °C) | ND                                  |
| 10              | 1:3:2                                | PPh <sub>3</sub> | THF               | rt to 50 °C | 24 (rt), 24 (50 °C) | ND                                  |
| 11              | 1:3:2                                | PPh <sub>3</sub> | HFIP              | rt to 50 °C | 24 (rt), 24 (50 °C) | ND                                  |
| 12 <sup>c</sup> | 1:3:0.2                              | PPh <sub>3</sub> | DCM               | rt          | 1                   | 16                                  |
| 13 <sup>c</sup> | 1:3:0.5                              | PPh <sub>3</sub> | DCM               | rt          | 3                   | 64                                  |
| 14              | 1:3:1                                | PPh <sub>3</sub> | DCM               | rt          | 1                   | 81 <sup>d</sup>                     |

<sup>a</sup> Reaction conditions: **1a** (0.2 mmol), **2a** and PPh<sub>3</sub>, in solvent (2 mL) in air.

<sup>b</sup> The yield was determined by <sup>1</sup>H-NMR spectra using 1,3,5-trimethoxybenzene as the internal standard.

<sup>c</sup> Large amount of **1a** was retained and there was no PPh<sub>3</sub> detected after the indicated reaction time. The yield will not be increased if the reaction time was prolonged. Instead, the yield will decrease owing to the instability of the product **4**.

<sup>d</sup> Isolated yield.

**Table S3** Optimization of the aromatization reaction conditions of **5a**.<sup>a</sup>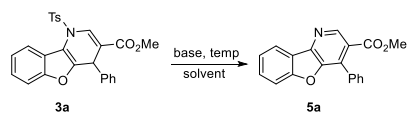

| Entry | <b>3a</b> :Base | Base | Solvent | Temp   | Time (h) | <b>5a</b> Yield (%) <sup>b</sup> |
|-------|-----------------|------|---------|--------|----------|----------------------------------|
| 1     | 1:5             | DBU  | DCE     | 120 °C | 48       | - <sup>c</sup>                   |
| 2     | 1:2             | DBU  | DMF     | 120 °C | 3        | 81                               |
| 3     | 1:2             | DBU  | Toluene | 120 °C | 3        | 80                               |
| 4     | 1:2             | DBU  | THF     | 120 °C | 3        | 93 <sup>d</sup>                  |
| 5     | 1:2             | DBU  | Acetone | 120 °C | 3        | 86                               |
| 6     | 1:2             | NaOH | Ethanol | 120 °C | 3        | trace                            |
| 7     | 1:1             | DBU  | THF     | 120 °C | 3        | 95 <sup>d</sup>                  |
| 8     | 1:2             | DBU  | THF     | rt     | 48       | 93 <sup>d</sup>                  |
| 9     | 1:1.5           | DBU  | THF     | 120 °C | 3        | 95 <sup>d</sup>                  |

<sup>a</sup> Reaction conditions: **3a** (0.1 mmol) and base in solvent in air.

<sup>b</sup> The yield was determined by <sup>1</sup>H-NMR spectra using 1,3,5-trimethoxybenzene as the internal standard.

<sup>c</sup> Large amount of **3a** was retained, although the amount of base of DBU has been increased to 5 equiv with prolonged time.

<sup>d</sup> Isolated yield.



## Asymmetric Versions for the Formation of 3a and 4a

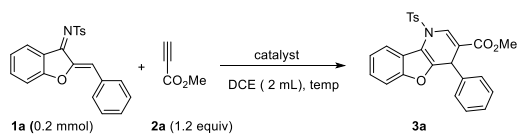

1. rt to 80 °C, Cat 1 (1.2 equiv), no product  
 2. rt to 80 °C, Cat 2 (1.2 equiv), no product  
 3. rt, Cat 3 (1.2 equiv), no product  
 4. 80 °C, 3 days, Cat 3 (1.2 equiv), Yield = 11%, 20% ee

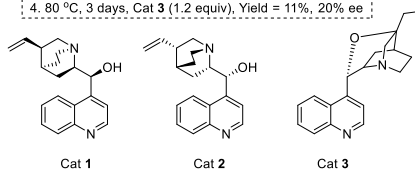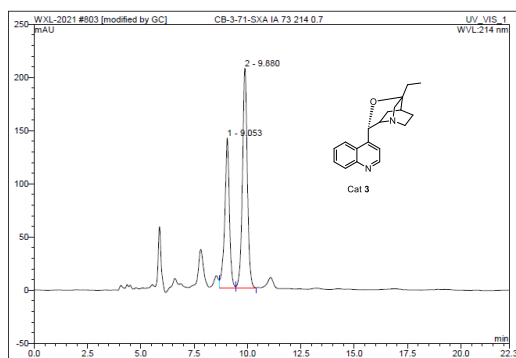

| No.           | Ret. Time<br>min | Peak Name | Height<br>mAU | Area<br>mAU*min | Rel. Area<br>% | Amount | Type |
|---------------|------------------|-----------|---------------|-----------------|----------------|--------|------|
| 1             | 9.05             | n.a.      | 140.712       | 36.111          | 39.81          | n.a.   | M*   |
| 2             | 9.88             | n.a.      | 206.376       | 54.599          | 60.19          | n.a.   | MB*  |
| <b>Total:</b> |                  |           | 347.088       | 90.711          | 100.00         | 0.000  |      |

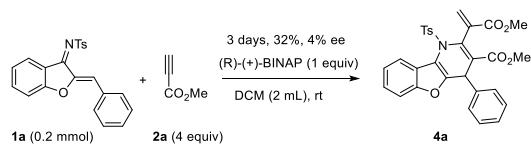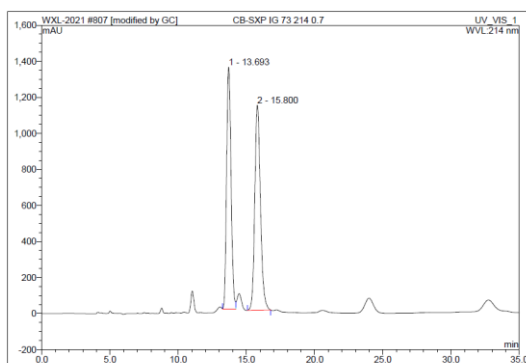

| No.           | Ret. Time<br>min | Peak Name | Height<br>mAU | Area<br>mAU*min | Rel. Area<br>% | Amount | Type |
|---------------|------------------|-----------|---------------|-----------------|----------------|--------|------|
| 1             | 13.69            | n.a.      | 1340.534      | 606.587         | 47.96          | n.a.   | BM*  |
| 2             | 15.80            | n.a.      | 1138.632      | 549.669         | 52.04          | n.a.   | BMB* |
| <b>Total:</b> |                  |           | 2479.167      | 1056.256        | 100.00         | 0.000  |      |

## 5. Proposed mechanisms for the Formation of 3a and 4a

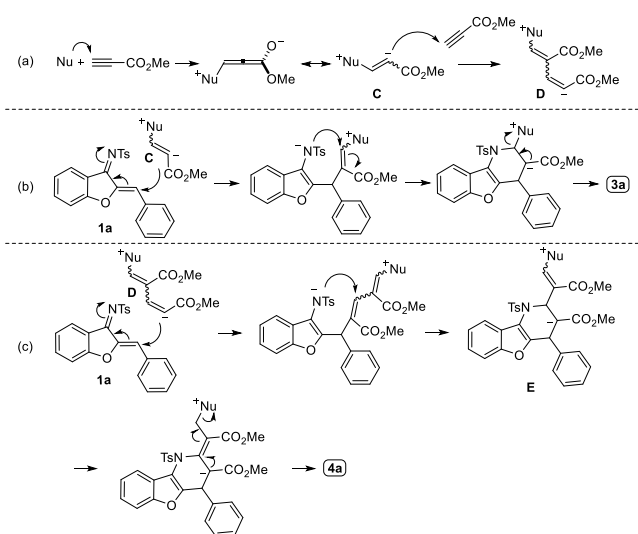

## 6. Characterization Data

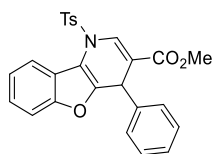

Methyl 4-phenyl-1-tosyl-1,4-dihydrobenzofuro[3,2-*b*]pyridine-3-carboxylate. Compound **3a** (69 mg, Yield = 75%,  $R_f = 0.56$  (PE/EA = 5:1)) was isolated as a yellow solid; mp 161–162 °C.  $^1\text{H}$  NMR (400 MHz,  $\text{CDCl}_3$ )  $\delta$  8.43–8.39 (m, 1H), 8.10 (s, 1H), 7.62 (d,  $J = 8.4$  Hz, 2H), 7.37–7.26 (m, 5H), 7.11 (t,  $J = 7.6$  Hz, 1H), 7.00 (t,  $J = 7.6$  Hz, 2H), 6.52 (d,  $J = 4.4$  Hz, 2H), 5.16 (s, 1H), 3.70 (s, 3H), 2.46 (s, 3H);  $^{13}\text{C}$  NMR (100 MHz,  $\text{CDCl}_3$ )  $\delta$  165.9, 154.4, 146.7, 145.3, 140.4, 135.3, 132.8, 130.4, 128.2, 128.0 (2C), 127.2, 125.0, 123.7, 122.5, 121.4, 116.0, 114.8, 111.7, 52.1, 40.5, 21.8; ESI-HRMS  $m/z$  calcd for  $\text{C}_{26}\text{H}_{22}\text{NO}_5\text{S}$   $[\text{M} + \text{H}]^+$  460.1213, found 460.1215.

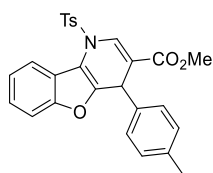

Methyl 4-(*p*-tolyl)-1-tosyl-1,4-dihydrobenzofuro[3,2-*b*]pyridine-3-carboxylate. Compound **3b** (77 mg, Yield = 81%,  $R_f = 0.32$  (PE/EA = 10:1)) was isolated as a yellow solid; mp 194–195 °C.  $^1\text{H}$  NMR (400 MHz,  $\text{CDCl}_3$ )  $\delta$  8.44–8.39 (m, 1H), 8.09 (s, 1H), 7.63 (d,  $J = 8.0$  Hz, 2H), 7.37–7.26 (m, 5H), 6.82 (d,  $J = 8.0$  Hz, 2H), 6.42 (d,  $J = 8.0$  Hz, 2H), 5.13 (s, 1H), 3.71 (s, 3H), 2.48 (s, 3H), 2.25 (s, 3H);  $^{13}\text{C}$  NMR (100 MHz,  $\text{CDCl}_3$ )  $\delta$  165.9, 154.3, 146.8, 145.3, 137.5, 136.8, 135.1, 132.6, 130.3, 129.0, 128.0, 127.8, 124.9, 123.6, 122.4, 121.4, 116.2, 114.6, 111.7, 52.1, 40.1, 21.8, 21.2; ESI-HRMS  $m/z$  calcd for  $\text{C}_{27}\text{H}_{24}\text{NO}_5\text{S}$   $[\text{M} + \text{H}]^+$  474.1370, found 474.1372.

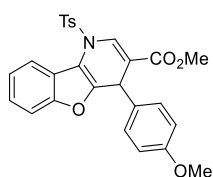

Methyl 4-(4-methoxyphenyl)-1-tosyl-1,4-dihydrobenzofuro[3,2-*b*]pyridine-3-carboxylate. Compound **3c** (80 mg, Yield = 82%,  $R_f = 0.33$  (PE/EA = 5:1)) was isolated as a yellow solid; mp 201–202 °C.  $^1\text{H}$  NMR (400 MHz,  $\text{CDCl}_3$ )  $\delta$  8.43–8.38 (m, 1H), 8.07 (s, 1H), 7.62 (d,  $J = 8.0$  Hz, 2H), 7.38–7.26 (m, 5H), 6.53 (d,  $J = 8.8$  Hz, 2H), 6.42 (d,  $J = 8.8$  Hz, 2H), 5.10 (s, 1H), 3.72 (s, 3H), 3.71 (s, 3H), 2.47 (s, 3H);  $^{13}\text{C}$  NMR (100 MHz,  $\text{CDCl}_3$ )  $\delta$  165.9, 158.5, 154.3, 146.9, 145.2, 135.0, 132.7, 132.6, 130.3, 129.0, 128.0, 125.0, 123.6, 122.4, 121.4, 116.3, 114.6, 113.5, 111.6, 55.2, 52.1, 39.6, 21.8; ESI-HRMS  $m/z$  calcd for  $\text{C}_{27}\text{H}_{23}\text{NO}_6\text{SNa}$   $[\text{M} + \text{Na}]^+$  512.1138, found 512.1140.

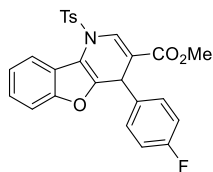

Methyl 4-(4-fluorophenyl)-1-tosyl-1,4-dihydrobenzofuro[3,2-*b*]pyridine-3-carboxylate. Compound **3d** (78 mg, Yield = 82%,  $R_f = 0.55$  (PE/EA = 5:1)) was isolated as a yellow oil.  $^1\text{H}$  NMR (400 MHz,  $\text{CDCl}_3$ )  $\delta$  8.42–8.38 (m, 1H), 8.09 (s, 1H), 7.62 (d,  $J = 8.4$  Hz, 2H), 7.37–7.30 (m, 3H), 7.28 (d,  $J = 8.0$  Hz, 2H), 6.68 (t,  $J = 8.4$  Hz, 2H), 6.52–6.45 (m, 2H), 5.14 (s, 1H), 3.71 (s, 3H), 2.46 (s, 3H);  $^{13}\text{C}\{^1\text{H}\}$  NMR (100 MHz,  $\text{CDCl}_3$ )  $\delta$  165.8, 161.8 (d,  $^1J_{\text{C-F}} = 244.8$  Hz), 154.3, 146.3, 145.4, 136.3 (d,  $^4J_{\text{C-F}} = 3.2$  Hz), 135.4, 132.7, 130.4, 129.5 (d,  $^3J_{\text{C-F}} = 8.1$  Hz), 128.0, 125.2, 123.8, 122.5, 121.3, 115.9, 115.1 (d,  $^2J_{\text{C-F}} = 21.5$  Hz), 114.8, 111.7, 52.2, 39.7, 21.8;  $^{19}\text{F}\{^1\text{H}\}$  NMR (376 MHz,  $\text{CDCl}_3$ )  $\delta$  -115.2 (s, 1F); ESI-HRMS  $m/z$  calcd for  $\text{C}_{26}\text{H}_{21}\text{FNO}_5\text{S}$  [ $\text{M} + \text{H}$ ] $^+$  478.1119, found 478.1121.

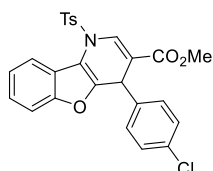

Methyl 4-(4-chlorophenyl)-1-tosyl-1,4-dihydrobenzofuro[3,2-*b*]pyridine-3-carboxylate. Compound **3e** (85 mg, Yield = 86%,  $R_f = 0.29$  (PE/EA = 10:1)) was isolated as a yellow solid; mp 192–193 °C.  $^1\text{H}$  NMR (400 MHz,  $\text{CDCl}_3$ )  $\delta$  8.42–8.37 (m, 1H), 8.09 (s, 1H), 7.61 (d,  $J = 8.0$  Hz, 2H), 7.38–7.24 (m, 5H), 6.96 (d,  $J = 8.4$  Hz, 2H), 6.46 (d,  $J = 8.4$  Hz, 2H), 5.14 (s, 1H), 3.72 (s, 3H), 2.46 (s, 3H);  $^{13}\text{C}$  NMR (100 MHz,  $\text{CDCl}_3$ )  $\delta$  165.7, 154.3, 146.0, 145.5, 139.0, 135.6, 133.0, 132.6, 130.4, 129.2, 128.4, 128.0, 125.2, 123.8, 122.5, 121.2, 115.6, 114.9, 111.7, 52.2, 39.8, 21.8; ESI-HRMS  $m/z$  calcd for  $\text{C}_{26}\text{H}_{21}\text{ClNO}_5\text{S}$  [ $\text{M} + \text{H}$ ] $^+$  494.0823, found 494.0826.

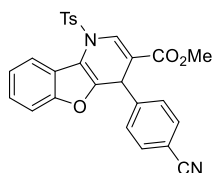

Methyl 4-(4-cyanophenyl)-1-tosyl-1,4-dihydrobenzofuro[3,2-*b*]pyridine-3-carboxylate. Compound **3f** (64 mg, Yield = 66%,  $R_f = 0.34$  (PE/EA = 5:1)) was isolated as a yellow solid; mp 94–95 °C.  $^1\text{H}$  NMR (400 MHz,  $\text{CDCl}_3$ )  $\delta$  8.43–8.37 (m, 1H), 8.13 (s, 1H), 7.61 (d,  $J = 8.4$  Hz, 2H), 7.38–7.32 (m, 3H), 7.31–7.26 (m, 4H), 6.67 (d,  $J = 8.4$  Hz, 2H), 5.22 (s, 1H), 3.71 (s, 3H), 2.47 (s, 3H);  $^{13}\text{C}$  NMR (100 MHz,  $\text{CDCl}_3$ )  $\delta$  165.5, 154.4, 145.6 (2C), 144.9, 136.1, 132.7, 132.1, 130.4, 128.7, 128.0, 125.5, 123.9, 122.6, 121.0, 118.6, 115.3, 114.6, 111.7, 111.1, 52.3, 40.5, 21.8; ESI-HRMS  $m/z$  calcd for  $\text{C}_{27}\text{H}_{21}\text{N}_2\text{O}_5\text{S}$  [ $\text{M} + \text{H}$ ] $^+$  485.1166, found 485.1168.

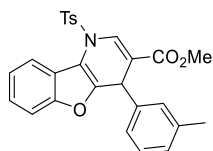

Methyl 4-(*m*-tolyl)-1-tosyl-1,4-dihydrobenzofuro[3,2-*b*]pyridine-3-carboxylate. Compound **3g** (76 mg, Yield = 80%,  $R_f = 0.42$  (PE/EA = 5:1)) was isolated as a yellow oli.  $^1\text{H}$  NMR (400 MHz,  $\text{CDCl}_3$ )  $\delta$  8.48–8.41 (m, 1H), 8.14 (s, 1H), 7.65 (d,  $J = 8.4$  Hz, 2H), 7.37–7.25 (m, 5H), 6.94 (d,  $J = 7.6$  Hz, 1H), 6.85 (t,  $J = 7.6$  Hz, 1H), 6.78 (br s, 1H), 6.13 (d,  $J = 7.8$  Hz, 1H), 5.14 (s, 1H), 3.71 (s, 3H), 2.43 (s, 3H), 2.20 (s, 3H);  $^{13}\text{C}$  NMR (100 MHz,  $\text{CDCl}_3$ )  $\delta$  165.9, 154.3, 146.6, 145.3, 140.4, 138.0, 135.2, 133.0, 130.3, 129.0, 128.1, 127.9, 124.9, 124.7, 123.6, 122.4, 121.2, 115.5, 114.5, 111.7, 52.1, 40.4, 21.8, 21.5, (1C peak is merged with other peaks); ESI-HRMS  $m/z$  calcd for  $\text{C}_{27}\text{H}_{23}\text{NO}_5\text{SNa}$  [ $\text{M} + \text{Na}$ ] $^+$  496.1189, found 496.1191.

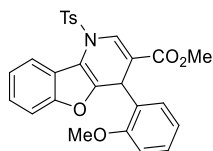

Methyl 4-(2-methoxyphenyl)-1-tosyl-1,4-dihydrobenzofuro[3,2-*b*]pyridine-3-carboxylate. Compound **3h** (81 mg, Yield = 83%,  $R_f = 0.41$  (PE/EA = 5:1)) was isolated as a yellow solid; mp 122–123 °C.  $^1\text{H}$  NMR (400 MHz,  $\text{CDCl}_3$ )  $\delta$  8.36 (dd,  $J = 7.2, 1.6$  Hz, 1H), 8.14 (s, 1H), 7.61 (d,  $J = 8.4$  Hz, 2H), 7.34–7.22 (m, 5H), 7.10–7.03 (m, 1H), 6.85 (d,  $J = 8.0$  Hz, 1H), 6.36 (td,  $J = 7.6, 1.2$  Hz, 1H), 5.74 (s, 1H), 5.70 (dd,  $J = 7.6, 1.6$  Hz, 1H), 3.91 (s, 3H), 3.64 (s, 3H), 2.42 (s, 3H);  $^{13}\text{C}$  NMR (100 MHz,  $\text{CDCl}_3$ )  $\delta$  165.8, 157.0, 154.1, 147.4, 145.2, 135.9, 132.8, 130.3, 129.6, 128.2, 128.0 (2C), 124.7, 123.4, 122.3, 121.3, 120.3, 116.0, 114.4, 111.7, 111.2, 56.3, 52.0, 32.4, 21.8; ESI-HRMS  $m/z$  calcd for  $\text{C}_{27}\text{H}_{23}\text{NO}_6\text{SNa}$  [ $\text{M} + \text{Na}$ ] $^+$  512.1138, found 512.1140.

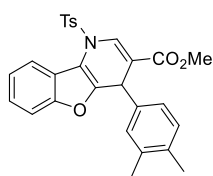

Methyl 4-(3,4-dimethylphenyl)-1-tosyl-1,4-dihydrobenzofuro[3,2-*b*]pyridine-3-carboxylate. Compound **3i** (74 mg, Yield = 76%,  $R_f = 0.22$  (PE/EA = 10:1)) was isolated as a yellow solid; mp 180–181 °C.  $^1\text{H}$  NMR (400 MHz,  $\text{CDCl}_3$ )  $\delta$  8.44–8.40 (m, 1H), 8.12 (s, 1H), 7.65 (d,  $J = 8.4$  Hz, 2H), 7.36–7.26 (m, 5H), 6.75 (d,  $J = 2.0$  Hz, 1H), 6.71 (d,  $J = 7.6$  Hz, 1H), 6.03 (dd,  $J = 8.0, 2.0$  Hz, 1H), 5.12 (s, 1H), 3.71 (s, 3H), 2.44 (s, 3H), 2.15 (s, 3H), 2.10 (s, 3H);  $^{13}\text{C}$  NMR (100 MHz,  $\text{CDCl}_3$ )  $\delta$  166.0, 154.3, 146.8, 145.3, 138.0, 136.6, 135.6, 135.1, 133.0, 130.3, 129.6, 128.0, 124.9 (2C), 123.6, 122.4, 121.3, 115.7, 114.5, 111.7, 52.1, 40.1, 21.8, 19.8, 19.6, (1C peak is merged with other peaks); ESI-HRMS  $m/z$  calcd for  $\text{C}_{28}\text{H}_{26}\text{NO}_5\text{S}$  [ $\text{M} + \text{H}$ ] $^+$  488.1526, found 488.1528.

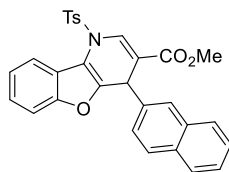

Methyl 4-(naphthalen-2-yl)-1-tosyl-1,4-dihydrobenzofuro[3,2-*b*]pyridine-3-carboxylate. Compound **3j** (70 mg, Yield = 69%,  $R_f = 0.48$  (PE/EA = 5:1)) was isolated as a yellow solid; mp 194–195 °C.  $^1\text{H}$  NMR (400 MHz,  $\text{CDCl}_3$ )  $\delta$  8.46 (dt,  $J = 8.0, 1.2$  Hz, 1H), 8.20 (s, 1H), 7.75–7.68 (m, 1H), 7.68 (d,  $J = 8.4$  Hz, 2H), 7.60–7.56 (m, 1H), 7.47–7.39 (m, 3H), 7.38–7.27 (m, 6H), 6.59 (dd,  $J = 8.6, 1.6$  Hz, 1H), 5.37 (s, 1H), 3.69 (s, 3H), 2.45 (s, 3H);  $^{13}\text{C}$  NMR (100 MHz,  $\text{CDCl}_3$ )  $\delta$  165.9, 154.4, 146.4, 145.4, 137.8, 135.5, 133.2, 133.0, 132.5, 130.4, 128.0 (3C), 127.6, 127.0, 126.1, 126.0, 125.6, 125.1, 123.7, 122.5, 121.2, 115.4, 114.8, 111.7, 52.1, 40.6, 21.8; ESI-HRMS  $m/z$  calcd for  $\text{C}_{30}\text{H}_{24}\text{NO}_5\text{S}$  [ $\text{M} + \text{H}$ ] $^+$  510.1371, found 510.1371.

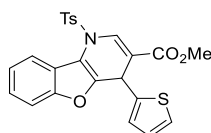

Methyl 4-(thiophen-2-yl)-1-tosyl-1,4-dihydrobenzofuro[3,2-*b*]pyridine-3-carboxylate. Compound **3k** (76 mg, Yield = 82%,  $R_f = 0.47$  (PE/EA = 5:1)) was isolated as a yellow solid; mp 106–107 °C.  $^1\text{H}$  NMR (400 MHz,  $\text{CDCl}_3$ )  $\delta$  8.43–8.36 (m, 1H), 8.09 (s, 1H), 7.58 (d,  $J = 8.4$  Hz, 2H), 7.41–7.29 (m, 3H), 7.20 (d,  $J = 8.0$  Hz, 2H), 7.01 (dd,  $J = 5.0, 1.2$  Hz, 1H), 6.68 (dd,  $J = 5.0, 3.6$  Hz, 1H), 6.13 (dd,  $J = 4.0, 1.2$  Hz, 1H), 5.46 (s, 1H), 3.77 (s, 3H), 2.39 (s, 3H);  $^{13}\text{C}$  NMR (100 MHz,  $\text{CDCl}_3$ )  $\delta$  165.8, 154.3, 145.6, 145.3, 144.9, 135.3, 132.9, 130.4, 127.8, 126.6, 125.2, 124.7, 123.7, 122.5, 121.2, 115.5, 114.7, 111.8, 52.2, 35.0, 21.7, (1C peak is merged with other peaks); ESI-HRMS  $m/z$  calcd for  $\text{C}_{24}\text{H}_{19}\text{NO}_5\text{S}_2\text{Na}$  [ $\text{M} + \text{Na}$ ] $^+$  488.0597, found 488.0597.

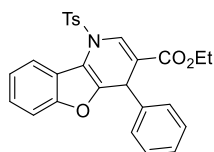

Ethyl 4-phenyl-1-tosyl-1,4-dihydrobenzofuro[3,2-*b*]pyridine-3-carboxylate. Compound **3m** (64 mg, Yield = 68%,  $R_f = 0.57$  (PE/EA = 5:1)) was isolated as a yellow oil.  $^1\text{H}$  NMR (400 MHz,  $\text{CDCl}_3$ )  $\delta$  8.44–8.38 (m, 1H), 8.10 (s, 1H), 7.63 (d,  $J = 8.0$  Hz, 2H), 7.37–7.26 (m, 5H), 7.11 (t,  $J = 7.6$  Hz, 1H), 7.00 (t,  $J = 7.6$  Hz, 2H), 6.52 (d,  $J = 6.8$  Hz, 2H), 5.16 (s, 1H), 4.24–4.04 (m, 2H), 2.46 (s, 3H), 1.22 (t,  $J = 7.2$  Hz, 3H);  $^{13}\text{C}$  NMR (100 MHz,  $\text{CDCl}_3$ )  $\delta$  165.4, 154.3, 146.8, 145.3, 140.5, 135.1, 132.7, 130.3, 128.2, 128.0 (2C), 127.2, 125.0, 123.6, 122.5, 121.4, 116.4, 114.8, 111.6, 61.1, 40.5, 21.8, 14.2; ESI-HRMS  $m/z$  calcd for  $\text{C}_{27}\text{H}_{24}\text{NO}_5\text{S}$  [ $\text{M} + \text{H}$ ] $^+$  474.1370, found 474.1373.

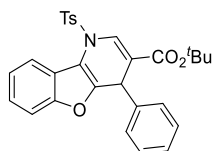

*tert*-Butyl 4-phenyl-1-tosyl-1,4-dihydrobenzofuro[3,2-*b*]pyridine-3-carboxylate. Compound **3n** (64 mg, Yield = 64%,  $R_f = 0.53$  (PE/EA = 5:1)) was isolated as a yellow solid; mp 169–170 °C.  $^1\text{H}$  NMR (400 MHz,  $\text{CDCl}_3$ )  $\delta$  8.41–8.36 (m, 1H), 8.02 (s, 1H), 7.61 (d,  $J = 8.4$  Hz, 2H), 7.35–7.24 (m, 5H), 7.14–7.08 (m, 1H), 7.01 (t,  $J = 8.0$  Hz, 2H), 6.53 (d,  $J = 6.8$  Hz, 2H), 5.10 (s, 1H), 2.45 (s, 3H), 1.34 (s, 9H);  $^{13}\text{C}$  NMR (100 MHz,  $\text{CDCl}_3$ )  $\delta$  164.6, 154.4, 146.9, 145.2, 140.8, 134.7, 132.8, 130.3, 128.1, 128.0, 127.9, 127.1, 124.9, 123.6, 122.5, 121.5, 117.8, 114.7, 111.6, 81.6, 40.8, 28.1, 21.8; ESI-HRMS  $m/z$  calcd for  $\text{C}_{29}\text{H}_{27}\text{NO}_5\text{SNa}$   $[\text{M} + \text{Na}]^+$  524.1502, found 524.1506.

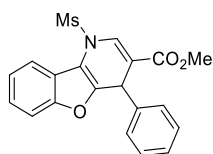

Methyl 1-(methylsulfonyl)-4-phenyl-1,4-dihydrobenzofuro[3,2-*b*]pyridine-3-carboxylate. Compound **3p** (65 mg, Yield = 84%,  $R_f = 0.32$  (PE/EA = 5:1)) was isolated as a yellow solid; mp 201–202 °C.  $^1\text{H}$  NMR (400 MHz,  $\text{CDCl}_3$ )  $\delta$  8.19–8.14 (m, 1H), 8.13 (s, 1H), 7.41–7.38 (m, 1H), 7.34–7.28 (m, 6H), 7.27–7.21 (m, 1H), 5.36 (s, 1H), 3.70 (s, 3H), 3.24 (s, 3H);  $^{13}\text{C}$  NMR (100 MHz,  $\text{CDCl}_3$ )  $\delta$  166.0, 154.3, 144.8, 141.3, 134.4, 128.8, 128.0, 127.6, 125.2, 123.8, 121.4, 119.6, 114.2, 112.4, 112.1, 52.1, 40.3 (2C); ESI-HRMS  $m/z$  calcd for  $\text{C}_{20}\text{H}_{17}\text{NO}_5\text{SNa}$   $[\text{M} + \text{Na}]^+$  406.0720, found 406.0717.

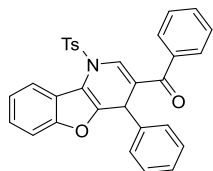

Phenyl(4-phenyl-1-tosyl-1,4-dihydrobenzofuro[3,2-*b*]pyridin-3-yl)methanone. Compound **3q** (55 mg, Yield = 54%,  $R_f = 0.40$  (PE/EA = 5:1)) was isolated as a yellow solid; mp 164–165 °C.  $^1\text{H}$  NMR (400 MHz,  $\text{CDCl}_3$ )  $\delta$  8.45–8.39 (m, 1H), 7.69–7.62 (m, 3H), 7.60–7.54 (m, 3H), 7.51–7.45 (m, 2H), 7.41–7.30 (m, 5H), 7.11 (t,  $J = 7.6$  Hz, 1H), 7.03 (t,  $J = 7.6$  Hz, 2H), 6.66 (d,  $J = 7.2$  Hz, 2H), 5.54 (s, 1H), 2.49 (s, 3H);  $^{13}\text{C}$  NMR (100 MHz,  $\text{CDCl}_3$ )  $\delta$  194.3, 154.4, 146.8, 145.6, 140.2, 138.0, 137.7, 132.9, 132.4, 130.4, 128.8, 128.6, 128.4, 128.0, 127.9, 127.2, 125.1, 124.6, 123.7, 122.4, 121.3, 114.9, 111.7, 40.1, 21.8; ESI-HRMS  $m/z$  calcd for  $\text{C}_{31}\text{H}_{24}\text{NO}_4\text{S}$   $[\text{M} + \text{H}]^+$  506.1421, found 506.1424.

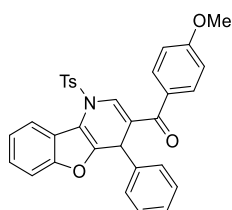

(4-Methoxyphenyl)(4-phenyl-1-tosyl-1,4-dihydrobenzofuro[3,2-*b*]pyridin-3-yl)methanone. Compound **3r** (87 mg, Yield = 81%,  $R_f = 0.34$  (PE/EA = 5:1)) was isolated as a yellow solid; mp 191–192 °C.  $^1\text{H}$  NMR (400 MHz,  $\text{CDCl}_3$ )  $\delta$  8.43–8.38 (m, 1H), 7.67–7.62 (m, 3H), 7.60 (d,  $J = 8.8$  Hz, 2H), 7.39–7.29 (m, 5H), 7.12–7.06 (m, 1H), 7.05–6.99 (m, 2H), 6.96 (d,  $J = 8.8$  Hz, 2H), 6.67–6.62 (m, 2H), 5.53 (s, 1H), 3.88 (s, 3H), 2.48 (s, 3H);  $^{13}\text{C}$  NMR (100 MHz,  $\text{CDCl}_3$ )  $\delta$  193.0, 163.2, 154.4, 146.8, 145.6, 140.2, 136.1, 132.9, 131.3, 130.4, 130.3, 128.4, 128.0, 127.9, 127.2, 125.0, 124.7, 123.7, 122.4, 121.7, 115.0, 113.9, 111.7, 55.6, 40.4, 21.8; ESI-HRMS  $m/z$  calcd for  $\text{C}_{32}\text{H}_{26}\text{NO}_5\text{S}$  [ $\text{M} + \text{H}$ ] $^+$  536.1526, found 536.1528.

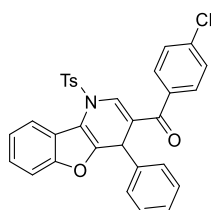

(4-Chlorophenyl)(4-phenyl-1-tosyl-1,4-dihydrobenzofuro[3,2-*b*]pyridin-3-yl)methanone. Compound **3s** (50 mg, Yield = 46%,  $R_f = 0.61$  (PE/EA = 5:1)) was isolated as a yellow solid; mp 208–209 °C.  $^1\text{H}$  NMR (400 MHz,  $\text{CDCl}_3$ )  $\delta$  8.40 (dd,  $J = 7.2, 2.0$  Hz, 1H), 7.64 (s, 1H), 7.63 (d,  $J = 8.0$  Hz, 2H), 7.54–7.43 (m, 4H), 7.40–7.30 (m, 5H), 7.14–7.07 (m, 1H), 7.02 (t,  $J = 8.0$  Hz, 2H), 6.64 (d,  $J = 7.2$  Hz, 2H), 5.49 (s, 1H), 2.49 (s, 3H);  $^{13}\text{C}$  NMR (100 MHz,  $\text{CDCl}_3$ )  $\delta$  193.0, 154.4, 146.6, 145.8, 140.1, 138.8, 137.7, 136.3, 132.9, 130.4, 130.2, 129.0, 128.5, 128.0, 127.9, 127.3, 125.2, 124.3, 123.8, 122.4, 121.2, 114.9, 111.8, 40.1, 21.9; ESI-HRMS  $m/z$  calcd for  $\text{C}_{31}\text{H}_{23}\text{ClNO}_4\text{S}$  [ $\text{M} + \text{H}$ ] $^+$  540.1031, found 540.1033.

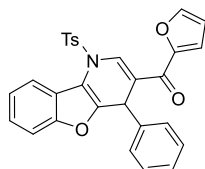

Furan-2-yl(4-phenyl-1-tosyl-1,4-dihydrobenzofuro[3,2-*b*]pyridin-3-yl)methanone. Compound **3t** (59 mg, Yield = 60%,  $R_f = 0.53$  (PE/EA = 5:1)) was isolated as a yellow oil.  $^1\text{H}$  NMR (400 MHz,  $\text{CDCl}_3$ )  $\delta$  8.48 (s, 1H), 8.44–8.40 (m, 1H), 7.71–7.66 (m, 3H), 7.38–7.26 (m, 5H), 7.20 (dd,  $J = 4.0, 0.8$  Hz, 1H), 7.10–7.05 (m, 1H), 7.02–6.96 (m, 2H), 6.63–6.59 (m, 2H), 6.57 (dd,  $J = 3.6, 1.6$  Hz, 1H), 5.48 (s, 1H), 2.45 (s, 3H);  $^{13}\text{C}$  NMR (100 MHz,  $\text{CDCl}_3$ )  $\delta$  179.0, 154.3, 152.4, 146.8, 146.4, 145.5, 140.2, 137.0, 132.8, 130.4, 128.3, 128.0 (2C), 127.1, 125.0, 123.7, 123.5, 122.4, 121.3, 119.0, 114.6, 112.4, 111.7, 39.9, 21.8; ESI-HRMS  $m/z$  calcd for  $\text{C}_{29}\text{H}_{22}\text{NO}_5\text{S}$  [ $\text{M} + \text{H}$ ] $^+$  496.1213, found 496.1216.

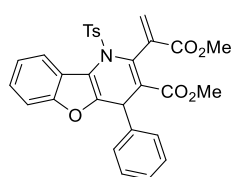



### Methyl

2-(3-methoxy-3-oxoprop-1-en-2-yl)-4-phenyl-1-tosyl-1,4-dihydrobenzofuro[3,2-*b*]pyridine-3-carboxylate. Compound **4a** (88 mg, Yield = 81%,  $R_f = 0.48$  (PE/EA = 3:1)) was isolated as a yellow oil.  $^1\text{H}$  NMR (400 MHz,  $\text{CDCl}_3$ )  $\delta$  8.20–8.15 (m, 1H), 7.46–7.40 (m, 1H), 7.39–7.30 (m, 4H), 7.15–7.04 (m, 3H), 6.96–6.84 (m, 4H), 6.66 (s, 1H), 6.09 (s, 1H), 5.08 (br s, 1H), 3.94 (s, 3H), 3.53 (s, 3H), 2.25 (s, 3H);  $^{13}\text{C}$  NMR (100 MHz,  $\text{CDCl}_3$ )  $\delta$  165.9, 165.6, 154.8, 149.4, 144.9, 140.0, 139.5, 131.9, 129.3, 129.1, 128.7, 128.4, 127.2, 126.3, 124.8, 123.6, 123.4, 122.1, 117.4, 111.6, 52.3, 52.2, 41.0, 21.7, (2C peaks are merged with other peaks); HRMS (ESI)  $m/z$ :  $[\text{M} + \text{Na}]^+$  calcd for  $\text{C}_{30}\text{H}_{25}\text{NO}_7\text{SNa}$  566.1244, found 566.1245.

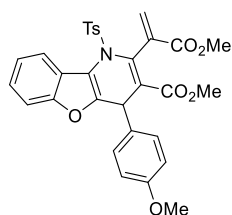

### Methyl

2-(3-methoxy-3-oxoprop-1-en-2-yl)-4-(4-methoxyphenyl)-1-tosyl-1,4-dihydrobenzofuro[3,2-*b*]pyridine-3-carboxylate. Compound **4b** (89 mg, Yield = 78%,  $R_f = 0.39$  (PE/EA = 3:1)) was isolated as a yellow oil.  $^1\text{H}$  NMR (400 MHz,  $\text{CDCl}_3$ )  $\delta$  8.19–8.14 (m, 1H), 7.45–7.40 (m, 1H), 7.39–7.29 (m, 4H), 6.95 (d,  $J = 8.0$  Hz, 2H), 6.82 (d,  $J = 8.5$  Hz, 2H), 6.67–6.56 (m, 3H), 6.08 (s, 1H), 4.95 (br s, 1H), 3.93 (s, 3H), 3.75 (s, 3H), 3.52 (s, 3H), 2.28 (s, 3H);  $^{13}\text{C}$  NMR (100 MHz,  $\text{CDCl}_3$ )  $\delta$  165.9, 165.6, 158.2, 154.7, 149.6, 145.0, 139.4, 132.3, 131.8, 129.3, 129.1, 128.7, 128.4, 124.7, 123.6, 123.4, 122.1, 117.2, 113.8, 111.6, 55.2, 52.3, 52.1, 40.4, 21.6, (2C peaks are merged with other peaks); HRMS (ESI)  $m/z$ :  $[\text{M} + \text{Na}]^+$  calcd for  $\text{C}_{31}\text{H}_{27}\text{NO}_8\text{SNa}$  596.1350, found 596.1351.

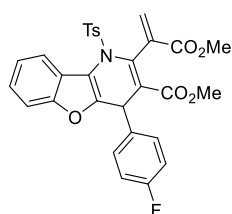

### Methyl

4-(4-fluorophenyl)-2-(3-methoxy-3-oxoprop-1-en-2-yl)-1-tosyl-1,4-dihydrobenzofuro[3,2-*b*]pyridine-3-carboxylate. Compound **4c** (101 mg, Yield = 90%,  $R_f = 0.56$  (PE/EA = 3:1)) was isolated as a yellow oil.  $^1\text{H}$  NMR (400 MHz,  $\text{CDCl}_3$ )  $\delta$  8.20–8.14 (m, 1H), 7.48–7.42 (m, 1H), 7.39–7.28 (m, 4H), 6.94–6.85 (m, 4H), 6.75 (t,  $J = 8.4$  Hz, 2H), 6.66 (s, 1H), 6.08 (s, 1H), 5.10 (br s, 1H), 3.94 (s, 3H), 3.55 (s, 3H), 2.26 (s, 3H);  $^{13}\text{C}\{^1\text{H}\}$  NMR (100 MHz,  $\text{CDCl}_3$ )  $\delta$  165.8, 165.6, 161.4 (d,  $^1J_{\text{C-F}} = 243.7$  Hz), 154.9, 149.2, 145.1, 139.4, 136.3, 132.1, 129.2, 129.1, 128.7, 124.9, 123.7, 123.3, 122.2, 117.5, 115.2 (d,  $^2J_{\text{C-F}} = 21.3$  Hz), 111.6, 52.4, 52.2, 40.2, 21.6, (3C peaks are merged with other peaks);  $^{19}\text{F}\{^1\text{H}\}$  NMR (376 MHz,  $\text{CDCl}_3$ ):  $\delta$  -116.4 (s, 1F); HRMS (ESI)  $m/z$ :  $[\text{M} + \text{Na}]^+$  calcd for  $\text{C}_{30}\text{H}_{24}\text{FNO}_7\text{SNa}$

584.1150, found 584.1153.

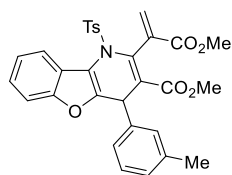

#### Methyl

2-(3-methoxy-3-oxoprop-1-en-2-yl)-4-(*m*-tolyl)-1-tosyl-1,4-dihydrobenzofuro[3,2-*b*]pyridine-3-carboxylate. Compound **4d** (97 mg, Yield = 87%,  $R_f = 0.53$  (PE/EA = 3:1)) was isolated as a yellow oil.  $^1\text{H}$  NMR (400 MHz,  $\text{CDCl}_3$ )  $\delta$  8.19–8.14 (m, 1H), 7.47–7.42 (m, 1H), 7.39–7.30 (m, 4H), 7.00–6.82 (m, 5H), 6.69–6.63 (m, 2H), 6.10 (s, 1H), 4.99 (br s, 1H), 3.94 (s, 3H), 3.53 (s, 3H), 2.26 (s, 3H), 2.25 (s, 3H);  $^{13}\text{C}$  NMR (100 MHz,  $\text{CDCl}_3$ )  $\delta$  165.9, 165.5, 154.8, 149.6, 144.7, 140.0, 139.4, 137.7, 131.9, 129.3, 129.2, 128.6, 128.4, 128.1, 127.3, 124.7, 124.2, 123.6, 123.4, 122.0, 117.4, 111.7, 52.3, 52.1, 40.8, 21.7, 21.6, (2C peaks are merged with other peaks); HRMS (ESI)  $m/z$ :  $[\text{M} + \text{Na}]^+$  calcd for  $\text{C}_{31}\text{H}_{27}\text{NO}_7\text{SNa}$  580.1400, found 580.1401.

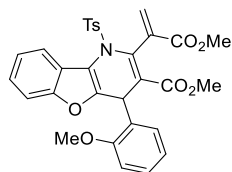

#### Methyl

2-(3-methoxy-3-oxoprop-1-en-2-yl)-4-(2-methoxyphenyl)-1-tosyl-1,4-dihydrobenzofuro[3,2-*b*]pyridine-3-carboxylate. Compound **4e** (108 mg, Yield = 94%,  $R_f = 0.36$  (PE/EA = 3:1)) was isolated as a yellow oil.  $^1\text{H}$  NMR (400 MHz,  $\text{CDCl}_3$ )  $\delta$  8.11 (d,  $J = 8.0$  Hz, 1H), 7.48 (d,  $J = 8.4$  Hz, 2H), 7.37–7.25 (m, 3H), 7.19–7.09 (m, 3H), 6.80 (d,  $J = 8.0$  Hz, 1H), 6.65–6.48 (m, 3H), 6.14 (s, 1H), 4.96 (br s, 1H), 3.88 (s, 3H), 3.79 (s, 3H), 3.38 (s, 3H), 2.39 (s, 3H);  $^{13}\text{C}$  NMR (100 MHz,  $\text{CDCl}_3$ )  $\delta$  166.0, 165.5, 157.0, 154.4, 149.8, 145.1, 138.9, 131.4, 129.5, 129.3, 129.0, 128.8, 128.4, 127.4, 124.5, 123.3, 123.4, 121.8, 120.8, 117.4, 111.6, 111.0, 56.0, 52.3, 51.8, 35.7, 21.8, (2C peaks are merged with other peaks); HRMS (ESI)  $m/z$ :  $[\text{M} + \text{Na}]^+$  calcd for  $\text{C}_{31}\text{H}_{27}\text{NO}_8\text{SNa}$  596.1350, found 596.1350.

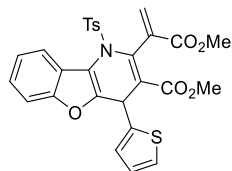

#### Methyl

2-(3-methoxy-3-oxoprop-1-en-2-yl)-4-(thiophen-2-yl)-1-tosyl-1,4-dihydrobenzofuro[3,2-*b*]pyridine-3-carboxylate. Compound **4f** (90s mg, Yield = 82%,  $R_f = 0.52$  (PE/EA = 3:1)) was isolated as a yellow oil.  $^1\text{H}$  NMR (400 MHz,  $\text{CDCl}_3$ )  $\delta$  8.23–8.16 (m, 1H), 7.49–7.44 (m, 1H), 7.40–7.30 (m, 4H), 7.02 (d,  $J =$

4.8 Hz, 1H), 6.87 (d,  $J = 8.0$  Hz, 2H), 6.65 (s, 1H), 6.62–6.56 (m, 1H), 6.18 (s, 1H), 6.03 (s, 1H), 5.40 (s, 1H), 3.93 (s, 3H), 3.65 (s, 3H), 2.25 (s, 3H);  $^{13}\text{C}$  NMR (100 MHz,  $\text{CDCl}_3$ )  $\delta$  165.5, 165.4, 154.8, 148.2, 144.8, 143.6, 139.5, 132.1, 129.3, 129.1, 128.5, 126.5, 125.0, 124.6, 124.1, 123.7, 123.2, 122.2, 117.7, 111.8, 52.3, 36.5, 21.7, (3C peaks are merged with other peaks); HRMS (ESI)  $m/z$ :  $[\text{M} + \text{Na}]^+$  calcd for  $\text{C}_{28}\text{H}_{23}\text{NO}_7\text{S}_2\text{Na}$  572.0808, found 572.0811.

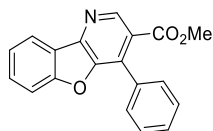

Methyl 4-phenylbenzofuro[3,2-*b*]pyridine-3-carboxylate. Compound **5a** (34 mg, Yield = 94%,  $R_f = 0.41$  (PE/EA = 5:1)) was isolated as a yellow solid; mp 170–171 °C.  $^1\text{H}$  NMR (400 MHz,  $\text{CDCl}_3$ )  $\delta$  9.14 (s, 1H), 8.29 (d,  $J = 8.0$  Hz, 1H), 7.62–7.44 (m, 8H), 3.75 (s, 3H);  $^{13}\text{C}$  NMR (100 MHz,  $\text{CDCl}_3$ )  $\delta$  167.1, 158.8, 147.4 (2C), 146.9, 134.2, 132.7, 130.4, 129.3, 129.1, 128.4, 124.1, 123.8, 123.0, 122.0, 112.7, 52.5; ESI-HRMS  $m/z$  calcd for  $\text{C}_{19}\text{H}_{14}\text{NO}_3$   $[\text{M} + \text{H}]^+$  304.0968, found 304.0967.

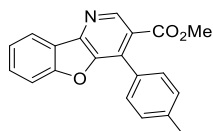

Methyl 4-(*p*-tolyl)benzofuro[3,2-*b*]pyridine-3-carboxylate. Compound **5b** (34 mg, Yield = 89%,  $R_f = 0.36$  (PE/EA = 5:1)) was isolated as a white solid; mp 140–141 °C.  $^1\text{H}$  NMR (400 MHz,  $\text{CDCl}_3$ )  $\delta$  9.12 (s, 1H), 8.28 (d,  $J = 7.6$  Hz, 1H), 7.63–7.55 (m, 2H), 7.49–7.40 (m, 3H), 7.36 (d,  $J = 8.0$  Hz, 2H), 3.78 (s, 3H), 2.47 (s, 3H);  $^{13}\text{C}$  NMR (100 MHz,  $\text{CDCl}_3$ )  $\delta$  167.2, 158.7, 147.5, 147.3, 146.7, 139.2, 134.3, 130.4, 129.5, 129.3, 129.2, 124.1, 123.7, 123.0, 122.0, 112.6, 52.5, 21.6; ESI-HRMS  $m/z$  calcd for  $\text{C}_{20}\text{H}_{16}\text{NO}_3$   $[\text{M} + \text{H}]^+$  318.1125, found 318.1125.

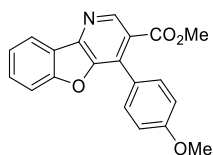

Methyl 4-(4-methoxyphenyl)benzofuro[3,2-*b*]pyridine-3-carboxylate. Compound **5c** (37 mg, Yield = 92%,  $R_f = 0.28$  (PE/EA = 5:1)) was isolated as a yellow solid; mp 128–129 °C.  $^1\text{H}$  NMR (400 MHz,  $\text{CDCl}_3$ )  $\delta$  9.09 (s, 1H), 8.28 (d,  $J = 8.0$  Hz, 1H), 7.63–7.56 (m, 2H), 7.54–7.44 (m, 3H), 7.07 (d,  $J = 8.8$  Hz, 2H), 3.90 (s, 3H), 3.78 (s, 3H);  $^{13}\text{C}$  NMR (100 MHz,  $\text{CDCl}_3$ )  $\delta$  167.4, 160.3, 158.7, 147.5, 147.3, 146.6, 133.9, 130.8, 130.3, 124.5, 124.0, 123.7, 123.0, 122.0, 114.0, 112.6, 55.4, 52.5; ESI-HRMS  $m/z$  calcd for  $\text{C}_{20}\text{H}_{16}\text{NO}_4$   $[\text{M} + \text{H}]^+$  334.1074, found 334.1075.

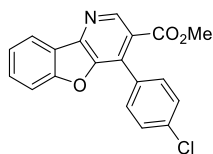

Methyl 4-(4-chlorophenyl)benzofuro[3,2-*b*]pyridine-3-carboxylate. Compound **5d** (38 mg, Yield = 94%,  $R_f = 0.41$  (PE/EA = 5:1)) was isolated as a white solid; mp 130–131 °C.  $^1\text{H}$  NMR (400 MHz,  $\text{CDCl}_3$ )  $\delta$  9.15 (s, 1H), 8.27 (d,  $J = 8.0$  Hz, 1H), 7.64–7.43 (m, 7H), 3.78 (s, 1H);  $^{13}\text{C}$  NMR (100 MHz,  $\text{CDCl}_3$ )  $\delta$  166.7, 158.8, 147.5, 147.2, 147.0, 135.2, 133.0, 131.0, 130.6 (2C), 128.8, 124.2, 123.2, 122.8, 122.0, 112.6, 52.6; ESI-HRMS  $m/z$  calcd for  $\text{C}_{19}\text{H}_{13}\text{ClNO}_3$  [ $\text{M} + \text{H}$ ] $^+$  338.0578, found 338.0579.

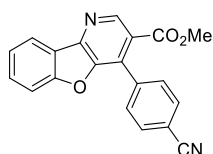

Methyl 4-(4-cyanophenyl)benzofuro[3,2-*b*]pyridine-3-carboxylate. Compound **5e** (35 mg, Yield = 90%,  $R_f = 0.21$  (PE/EA = 5:1)) was isolated as a white solid; mp 197–198 °C.  $^1\text{H}$  NMR (400 MHz,  $\text{CDCl}_3$ )  $\delta$  9.24 (s, 1H), 8.29 (d,  $J = 7.6$  Hz, 1H), 7.84 (d,  $J = 8.0$  Hz, 2H), 7.67–7.58 (m, 3H), 7.56 (d,  $J = 8.1$  Hz, 1H), 7.49 (t,  $J = 7.4$  Hz, 1H), 3.79 (s, 3H);  $^{13}\text{C}$  NMR (100 MHz,  $\text{CDCl}_3$ )  $\delta$  166.2, 158.9, 147.8, 147.5, 147.0, 137.7, 132.3, 132.1, 131.0, 130.1, 124.5, 122.6, 122.5, 122.2, 118.7, 112.8, 112.6, 52.7; ESI-HRMS  $m/z$  calcd for  $\text{C}_{20}\text{H}_{13}\text{N}_2\text{O}_3$  [ $\text{M} + \text{H}$ ] $^+$  329.0921, found 329.0920.

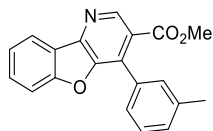

Methyl 4-(*m*-tolyl)benzofuro[3,2-*b*]pyridine-3-carboxylate. Compound **5f** (30 mg, Yield = 79%,  $R_f = 0.39$  (PE/EA = 5:1)) was isolated as a yellow solid; mp 145–146 °C.  $^1\text{H}$  NMR (400 MHz,  $\text{CDCl}_3$ )  $\delta$  9.13 (s, 1H), 8.29 (d,  $J = 7.6$  Hz, 1H), 7.63–7.56 (m, 2H), 7.50–7.41 (m, 2H), 7.36–7.29 (m, 3H), 3.76 (s, 3H), 2.47 (s, 3H);  $^{13}\text{C}$  NMR (100 MHz,  $\text{CDCl}_3$ )  $\delta$  167.2, 158.8, 147.5, 147.2, 146.7, 138.1, 134.3, 132.6, 130.4, 129.9, 129.8, 128.4, 126.3, 124.1, 123.9, 123.0, 122.0, 112.7, 52.5, 21.7; ESI-HRMS  $m/z$  calcd for  $\text{C}_{20}\text{H}_{16}\text{NO}_3$  [ $\text{M} + \text{H}$ ] $^+$  318.1125, found 318.1125.

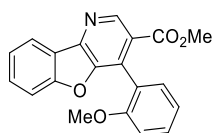

Methyl 4-(2-methoxyphenyl)benzofuro[3,2-*b*]pyridine-3-carboxylate. Compound **5g** (38 mg, Yield = 95%,  $R_f = 0.30$  (PE/EA = 5:1)) was isolated as a yellow solid; mp 141–142 °C.  $^1\text{H}$  NMR (400 MHz,  $\text{CDCl}_3$ )  $\delta$  9.16 (s, 1H), 8.28 (d,  $J = 7.6$  Hz, 1H), 7.62–7.42 (m, 5H), 7.16 (t,  $J = 7.2$  Hz, 1H), 7.04 (d,  $J = 8.0$  Hz, 1H), 3.75 (s, 3H), 3.74 (s, 3H);  $^{13}\text{C}$  NMR (100 MHz,  $\text{CDCl}_3$ )  $\delta$  166.9, 158.6, 156.4, 147.7,

147.0, 146.9, 130.8, 130.7, 130.6, 130.2, 124.5, 123.9, 123.1, 121.9, 121.6, 120.7, 112.6, 110.8, 55.5, 52.2; ESI-HRMS  $m/z$  calcd for  $C_{20}H_{16}NO_4$   $[M + H]^+$  334.1074, found 334.1073.

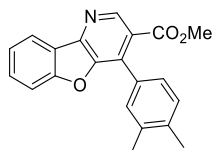

Methyl 4-(3,4-dimethylphenyl)benzofuro[3,2-*b*]pyridine-3-carboxylate. Compound **5h** (36 mg, Yield = 90%,  $R_f$  = 0.28 (PE/EA = 10:1)) was isolated as a yellow solid; mp 133–134 °C.  $^1H$  NMR (400 MHz,  $CDCl_3$ )  $\delta$  9.10 (s, 1H), 8.28 (d,  $J$  = 7.6 Hz, 1H), 7.62–7.56 (m, 2H), 7.50–7.42 (m, 1H), 7.34–7.24 (m, 3H), 3.78 (s, 3H), 2.37 (s, 6H);  $^{13}C$  NMR (100 MHz,  $CDCl_3$ )  $\delta$  167.2, 158.7, 147.5, 147.2, 146.6, 137.8, 136.8, 134.4, 130.3, 129.9, 129.8, 126.7, 124.0, 123.8, 123.0, 121.9, 112.7, 52.5, 20.0, 19.9, (1C peak is merged with other peaks); ESI-HRMS  $m/z$  calcd for  $C_{21}H_{18}NO_3$   $[M + H]^+$  332.1281, found 332.1283.

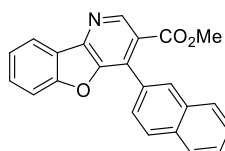

Methyl 4-(naphthalen-2-yl)benzofuro[3,2-*b*]pyridine-3-carboxylate. Compound **5i** (40 mg, Yield = 94%,  $R_f$  = 0.39 (PE/EA = 5:1)) was isolated as a yellow solid; mp 168–169 °C.  $^1H$  NMR (400 MHz,  $CDCl_3$ )  $\delta$  9.20 (s, 1H), 8.32 (d,  $J$  = 7.6 Hz, 1H), 8.07 (d,  $J$  = 1.6 Hz, 1H), 8.00 (d,  $J$  = 8.4 Hz, 1H), 7.97–7.92 (m, 2H), 7.63–7.53 (m, 5H), 7.51–7.45 (m, 1H), 3.72 (s, 3H);  $^{13}C$  NMR (100 MHz,  $CDCl_3$ )  $\delta$  167.1, 158.8, 147.6, 147.5, 146.9, 134.2, 133.4, 133.1, 130.5, 130.1, 128.8, 128.6, 128.0, 127.0, 126.8, 126.7, 124.1, 123.8, 123.0, 122.0, 112.7, 52.5, (1C peak is merged with other peaks); ESI-HRMS  $m/z$  calcd for  $C_{23}H_{16}NO_3$   $[M + H]^+$  354.1125, found 354.1125.

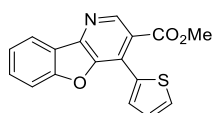

Methyl 4-(thiophen-2-yl)benzofuro[3,2-*b*]pyridine-3-carboxylate. Compound **5j** (36 mg, Yield = 97%,  $R_f$  = 0.33 (PE/EA = 5:1)) was isolated as a yellow solid; mp 145–146 °C.  $^1H$  NMR (400 MHz,  $CDCl_3$ )  $\delta$  8.99 (s, 1H), 8.26 (d,  $J$  = 7.6 Hz, 1H), 7.64–7.58 (m, 3H), 7.52 (dd,  $J$  = 3.6, 1.2 Hz, 1H), 7.49–7.44 (m, 1H), 7.24 (dd,  $J$  = 5.2, 3.6 Hz, 1H), 3.86 (s, 3H);  $^{13}C$  NMR (100 MHz,  $CDCl_3$ )  $\delta$  167.4, 158.6, 146.8, 146.7, 146.6, 132.1, 130.4, 130.3, 128.9, 127.6, 126.4, 124.2, 124.0, 122.9, 122.0, 112.6, 52.8; ESI-HRMS  $m/z$  calcd for  $C_{17}H_{12}NO_3S$   $[M + H]^+$  310.0532, found 310.0532.

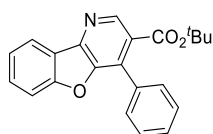

*tert*-Butyl 4-phenylbenzofuro[3,2-*b*]pyridine-3-carboxylate. Compound **5k** (37 mg, Yield = 90%,  $R_f$  = 0.45 (PE/EA = 10:1)) was isolated as a yellow solid; mp 120–121 °C.  $^1\text{H}$  NMR (400 MHz,  $\text{CDCl}_3$ )  $\delta$  9.09 (s, 1H), 8.28 (d,  $J$  = 8.0 Hz, 1H), 7.61–7.42 (m, 8H), 1.30 (s, 9H);  $^{13}\text{C}$  NMR (100 MHz,  $\text{CDCl}_3$ )  $\delta$  166.0, 158.7, 147.4, 147.3, 146.2, 133.5, 133.3, 130.2, 129.4, 128.8, 128.4, 126.0, 124.0, 123.0, 121.9, 112.6, 82.4, 27.7; ESI-HRMS  $m/z$  calcd for  $\text{C}_{22}\text{H}_{20}\text{NO}_3$   $[\text{M} + \text{H}]^+$  346.1438, found 346.1437.

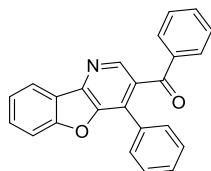

Phenyl(4-phenylbenzofuro[3,2-*b*]pyridin-3-yl)methanone. Compound **5l** (35 mg, Yield = 84%,  $R_f$  = 0.31 (PE/EA = 5:1)) was isolated as a yellow solid; mp 163–164 °C.  $^1\text{H}$  NMR (400 MHz,  $\text{CDCl}_3$ )  $\delta$  8.80 (s, 1H), 8.32 (d,  $J$  = 8.0 Hz, 1H), 7.71 (dd,  $J$  = 8.6, 1.6 Hz, 2H), 7.62 (d,  $J$  = 3.6 Hz, 2H), 7.56–7.43 (m, 4H), 7.38–7.28 (m, 5H);  $^{13}\text{C}$  NMR (100 MHz,  $\text{CDCl}_3$ )  $\delta$  196.1, 158.6, 147.0, 146.1, 145.8, 137.4, 133.5, 132.6, 132.2, 131.9, 130.2, 130.1, 130.0, 129.3, 128.7, 128.5, 124.2, 123.1, 121.9, 112.6; ESI-HRMS  $m/z$  calcd for  $\text{C}_{24}\text{H}_{16}\text{NO}_2$   $[\text{M} + \text{H}]^+$  350.1176, found 350.1177.

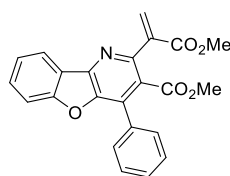

Methyl 2-(3-methoxy-3-oxoprop-1-en-2-yl)-4-phenylbenzofuro[3,2-*b*]pyridine-3-carboxylate. Compound **6a** (64 mg, Yield = 83%,  $R_f$  = 0.45 (PE/EA = 3:1)) was isolated as a yellow oil.  $^1\text{H}$  NMR (400 MHz,  $\text{CDCl}_3$ )  $\delta$  8.30 (dt,  $J$  = 7.6, 1.2 Hz, 1H), 7.62–7.41 (m, 8H), 6.72 (d,  $J$  = 1.4 Hz, 1H), 6.22 (d,  $J$  = 1.4 Hz, 1H), 3.79 (s, 3H), 3.56 (s, 3H);  $^{13}\text{C}$  NMR (100 MHz,  $\text{CDCl}_3$ )  $\delta$  168.1, 166.3, 158.7, 150.4, 146.6, 144.9, 140.9, 132.7, 132.6, 130.9, 130.2, 129.3, 129.1, 128.7, 125.9, 124.0, 122.9, 122.0, 112.5, 52.4, 52.3; HRMS (ESI)  $m/z$ :  $[\text{M} + \text{H}]^+$  calcd for  $\text{C}_{23}\text{H}_{18}\text{NO}_5$  388.1179, found 388.1178.

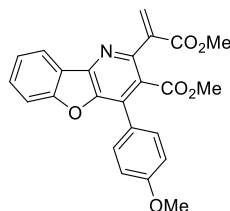

Methyl 2-(3-methoxy-3-oxoprop-1-en-2-yl)-4-(4-methoxyphenyl)benzofuro[3,2-*b*]pyridine-3-carboxylate. Compound **6b** (77 mg, Yield = 92%,  $R_f$  = 0.33 (PE/EA = 3:1)) was isolated as a yellow oil.  $^1\text{H}$  NMR (400 MHz,  $\text{CDCl}_3$ )  $\delta$  8.29 (dt,  $J$  = 8.0, 1.2 Hz, 1H), 7.60–7.52 (m, 4H), 7.48–7.40 (m, 1H), 7.09–7.03 (m, 2H), 6.70 (d,  $J$  = 1.2 Hz, 1H), 6.18 (d,  $J$  = 1.2 Hz, 1H), 3.89 (s, 3H), 3.78 (s, 3H), 3.61 (s, 3H);  $^{13}\text{C}$

NMR (100 MHz, CDCl<sub>3</sub>)  $\delta$  168.3, 166.3, 160.4, 158.6, 150.4, 146.7, 144.7, 140.9, 132.3, 130.8, 130.6, 130.1, 125.8, 124.7, 124.0, 123.0, 122.0, 114.2, 112.5, 55.4, 52.5, 52.4; HRMS (ESI)  $m/z$ : [M + H]<sup>+</sup> calcd for C<sub>24</sub>H<sub>20</sub>NO<sub>6</sub> 418.1285, found 418.1283.

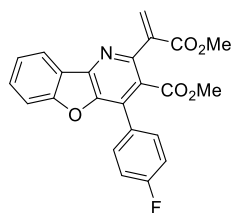

Methyl 4-(4-fluorophenyl)-2-(3-methoxy-3-oxoprop-1-en-2-yl)benzofuro[3,2-*b*]pyridine-3-carboxylate. Compound **6c** (75 mg, Yield = 92%, R<sub>f</sub> = 0.49 (PE/EA = 3:1)) was isolated as a yellow oil. <sup>1</sup>H NMR (400 MHz, CDCl<sub>3</sub>)  $\delta$  8.28 (d, *J* = 8.0, 1H), 7.60–7.53 (m, 4H), 7.48–7.39 (m, 1H), 7.25–7.19 (m, 2H), 6.71 (s, 1H), 6.21 (s, 1H), 3.78 (s, 3H), 3.59 (s, 3H); <sup>13</sup>C{<sup>1</sup>H} NMR (100 MHz, CDCl<sub>3</sub>)  $\delta$  167.9, 166.2, 163.2 (d, <sup>1</sup>*J*<sub>C-F</sub> = 248.2 Hz), 158.7, 150.5, 146.5, 144.9, 140.8, 131.5, 131.1 (d, <sup>3</sup>*J*<sub>C-F</sub> = 8.4 Hz), 130.8, 130.3, 128.6 (d, <sup>4</sup>*J*<sub>C-F</sub> = 3.5 Hz), 125.7, 124.1, 122.8, 122.1, 115.9 (d, <sup>2</sup>*J*<sub>C-F</sub> = 21.8 Hz), 112.4, 52.4, 52.3; <sup>19</sup>F{<sup>1</sup>H} NMR (376 MHz, CDCl<sub>3</sub>):  $\delta$  -111.7 (s, 1F); HRMS (ESI)  $m/z$ : [M + H]<sup>+</sup> calcd for C<sub>23</sub>H<sub>17</sub>FNO<sub>5</sub> 406.1085, found 406.1086.

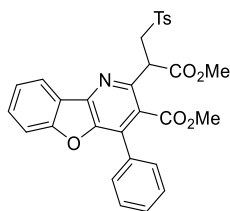

Methyl 2-(1-methoxy-1-oxo-3-tosylpropan-2-yl)-4-phenylbenzofuro[3,2-*b*]pyridine-3-carboxylate. Compound **7a** (15 mg, Yield = 14%, R<sub>f</sub> = 0.35 (PE/EA = 3:1)) was isolated as a yellow solid; mp 163–164 °C. <sup>1</sup>H NMR (400 MHz, CDCl<sub>3</sub>)  $\delta$  8.05 (d, *J* = 7.6 Hz, 1H), 7.61–7.50 (m, 9H), 7.48–7.42 (m, 1H), 6.86 (d, *J* = 7.6 Hz, 2H), 5.01 (dd, *J* = 8.8, 4.4 Hz, 1H), 4.55 (dd, *J* = 14.8, 8.8 Hz, 1H), 4.11 (dd, *J* = 14.8, 4.4 Hz, 1H), 3.67 (s, 3H), 3.65 (s, 3H), 1.86 (s, 3H); <sup>13</sup>C NMR (100 MHz, CDCl<sub>3</sub>)  $\delta$  170.4, 168.1, 158.6, 147.6, 145.9, 144.5, 144.1, 136.4, 132.6, 132.2, 130.2, 129.5, 129.1, 129.0, 128.9, 128.1, 126.9, 124.0, 122.6, 122.2, 112.4, 56.6, 53.1, 52.8, 45.3, 21.1; HRMS (ESI)  $m/z$ : [M + Na]<sup>+</sup> calcd for C<sub>30</sub>H<sub>25</sub>NO<sub>7</sub>SNa 566.1244, found 566.1245.

## 7. NMR Spectra

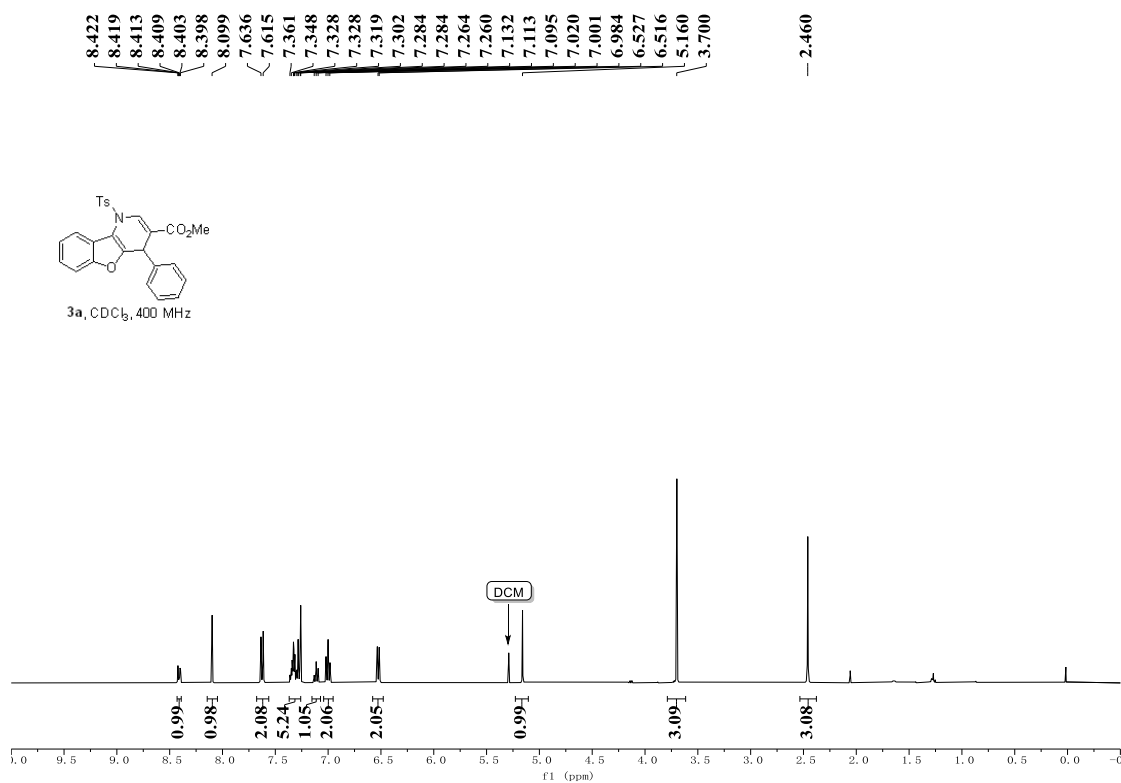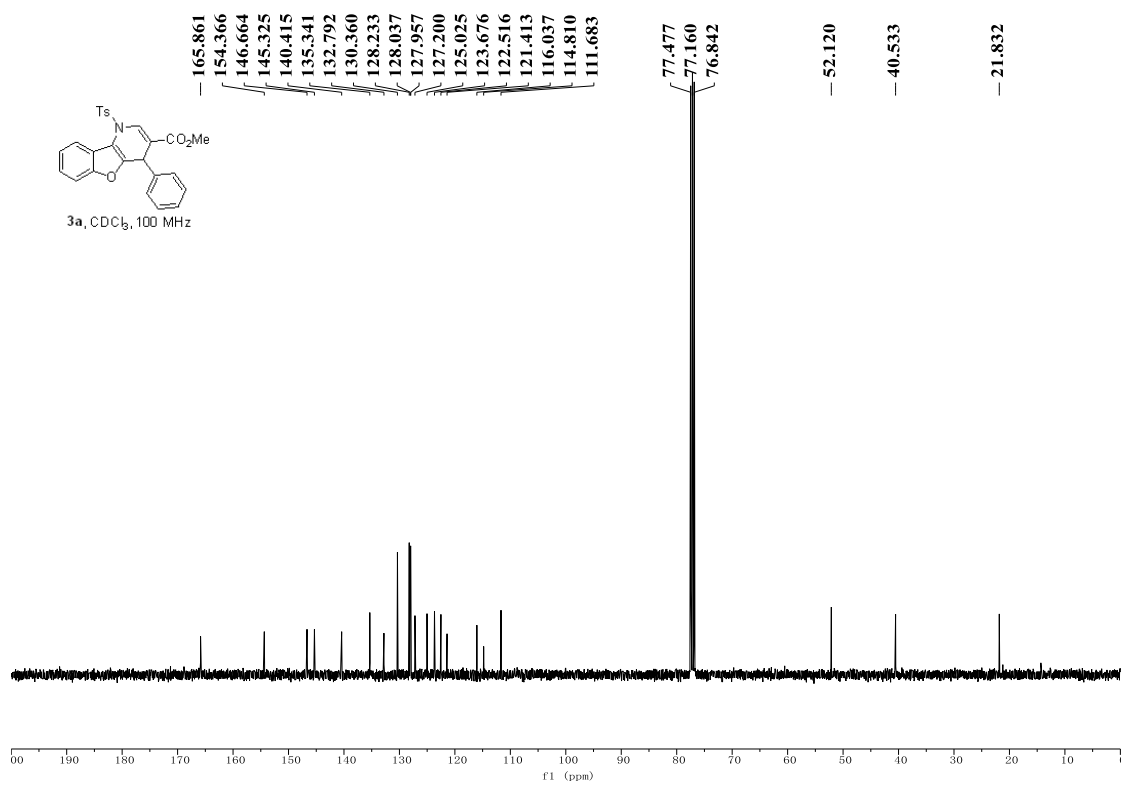



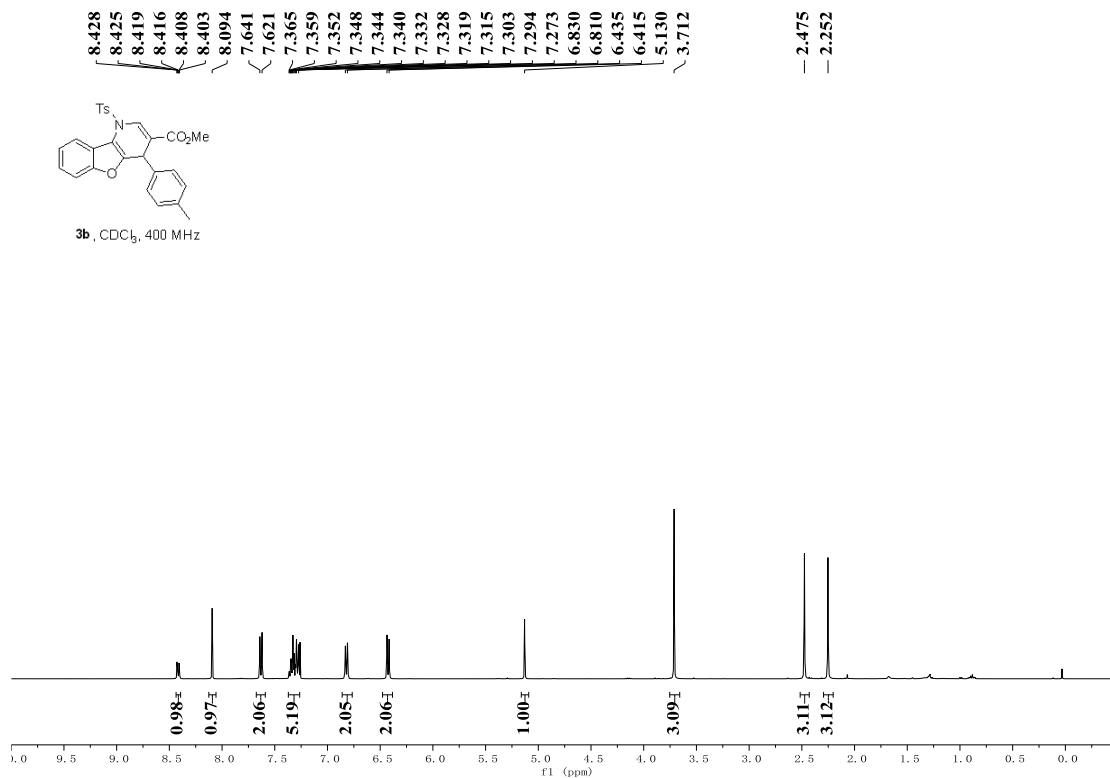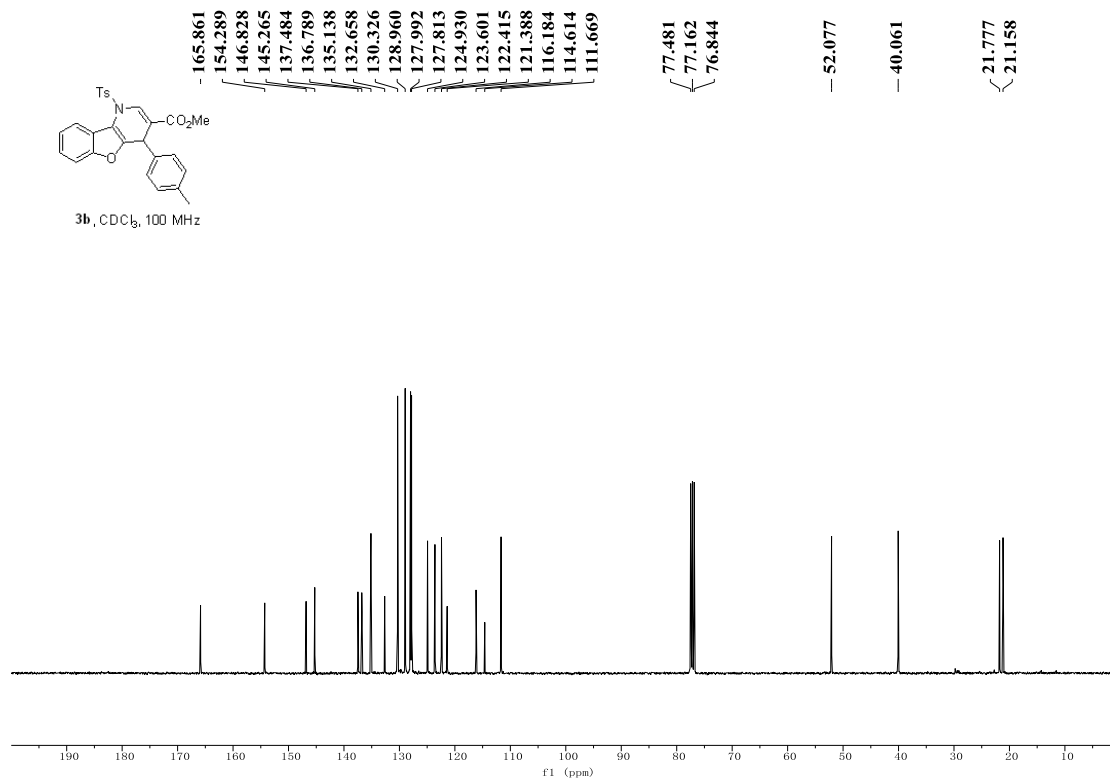

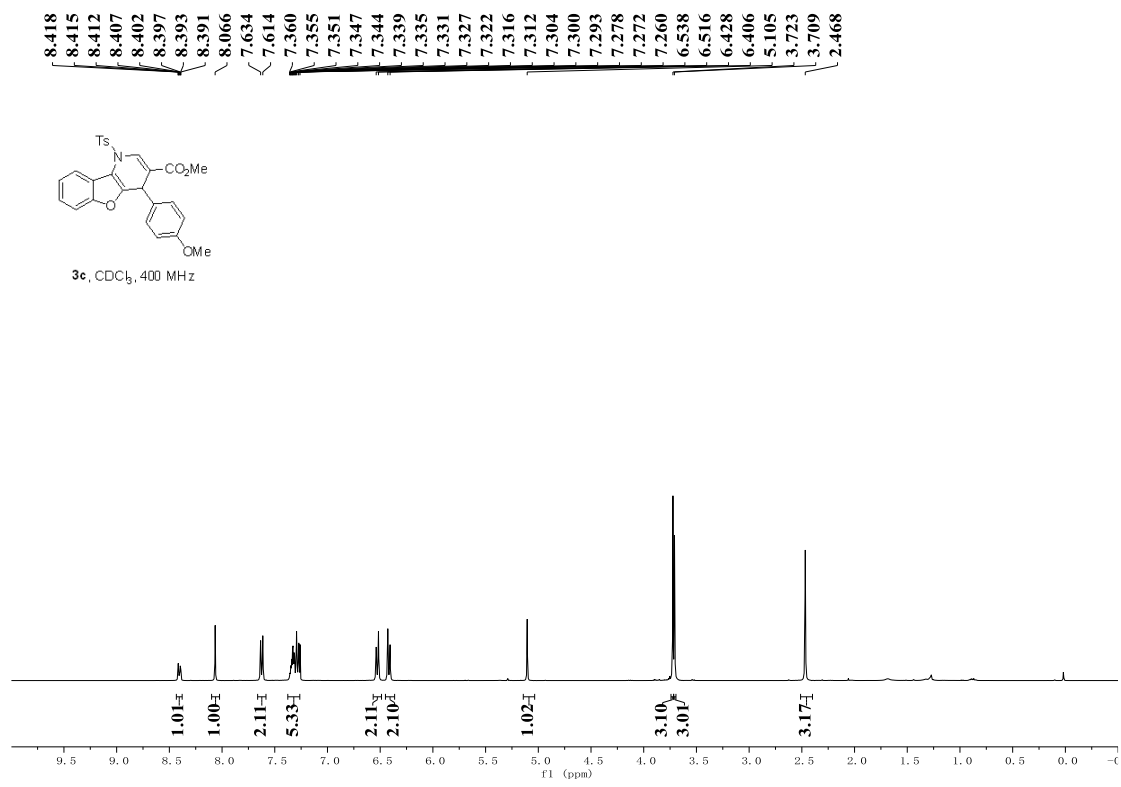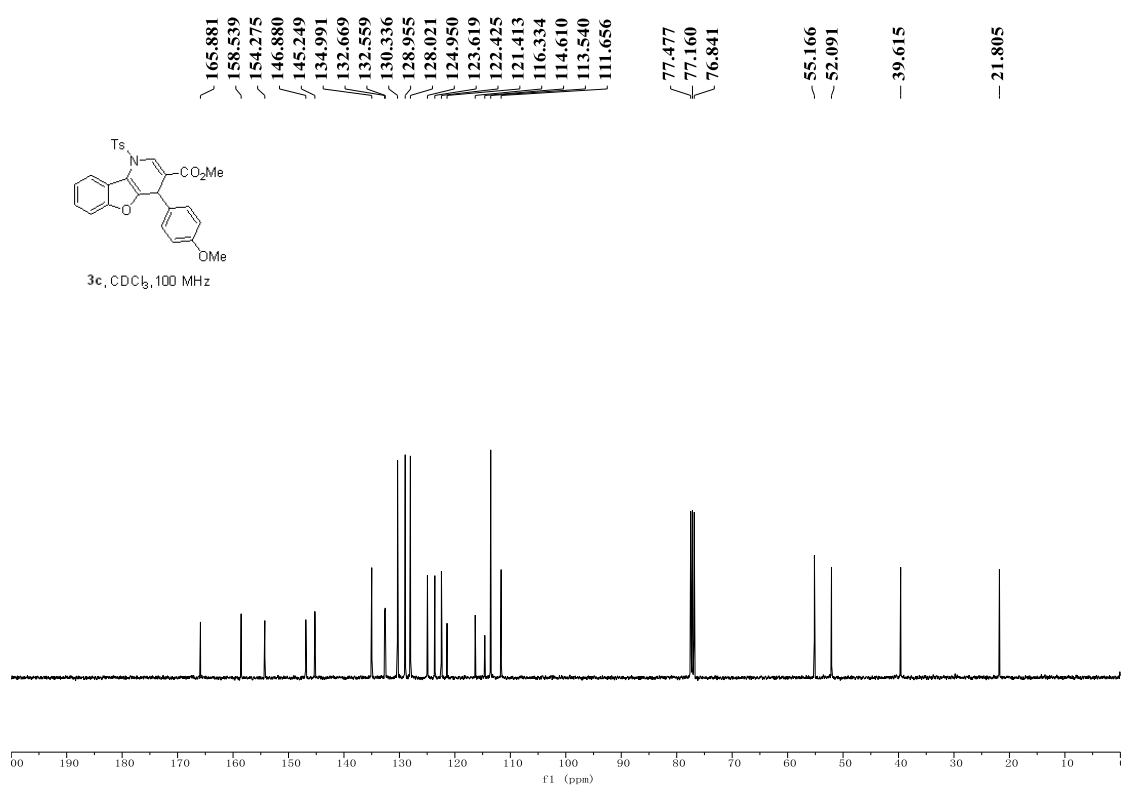

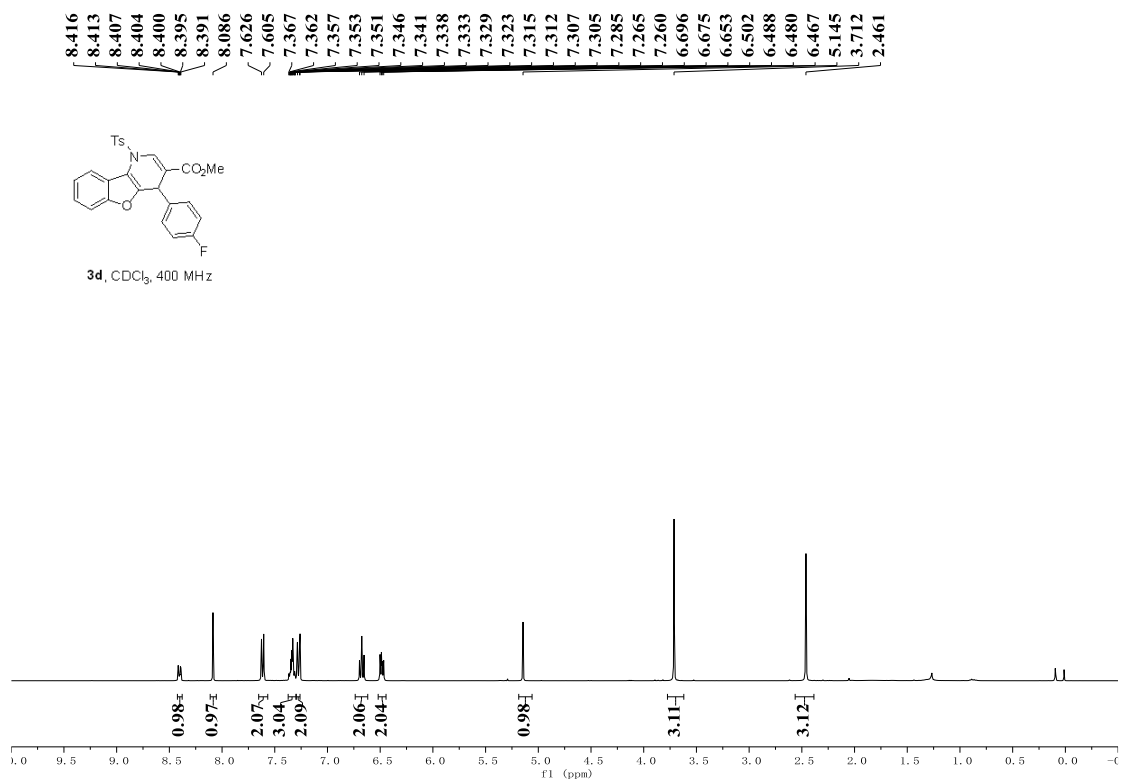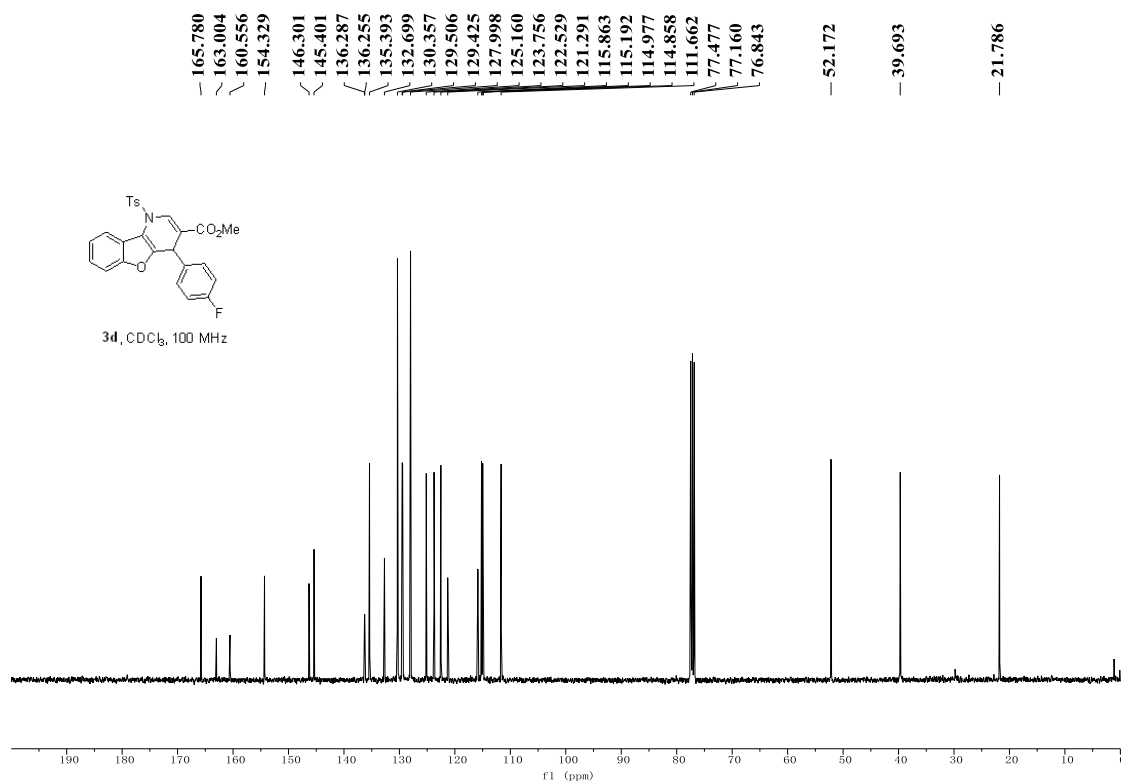

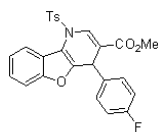

3d, CDCl<sub>3</sub>, 376 MHz

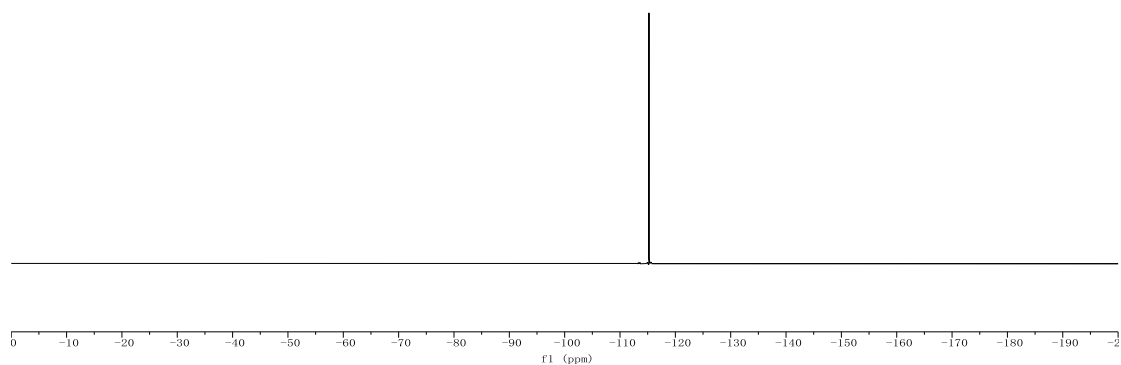

-115.229

8.414  
8.410  
8.405  
8.402  
8.394  
8.389  
8.094  
7.616  
7.596  
7.356  
7.347  
7.331  
7.331  
7.325  
7.281  
7.261  
6.946  
6.471  
6.450  
5.135

-3.715

-2.465

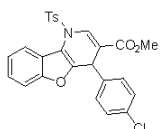

3e, CDCl<sub>3</sub>, 400 MHz

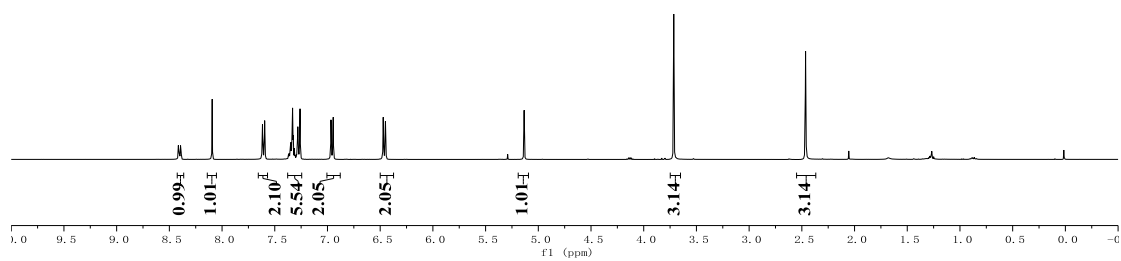

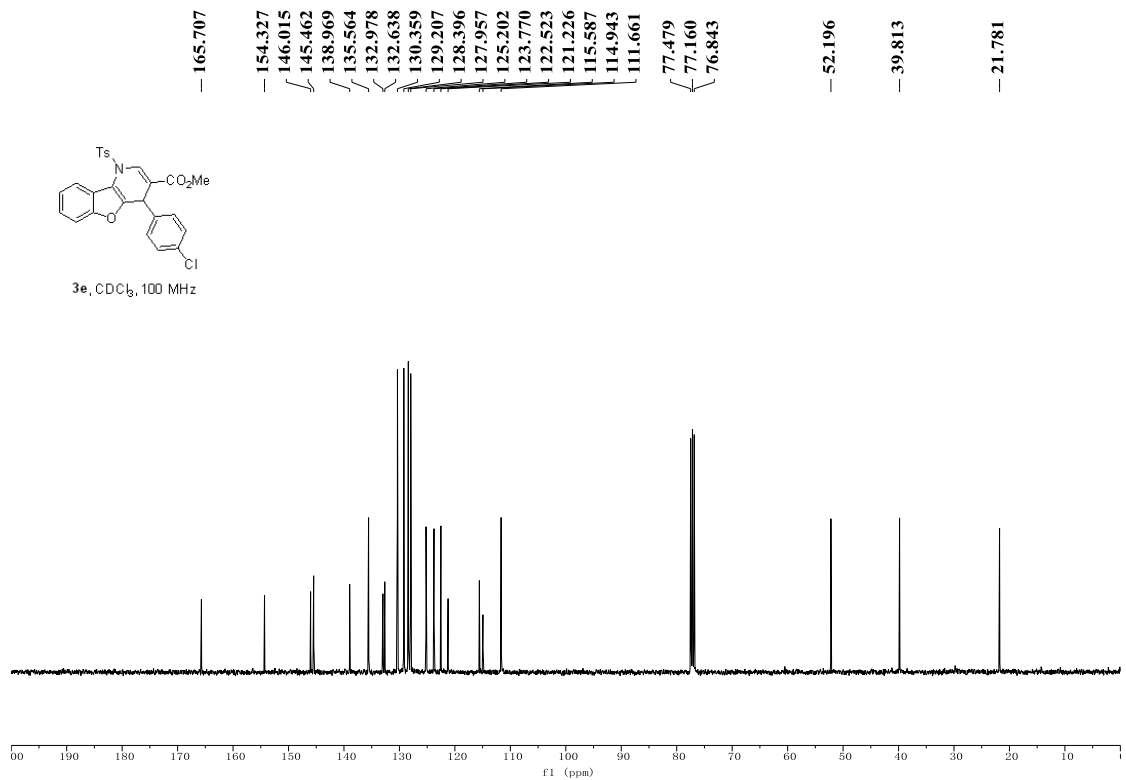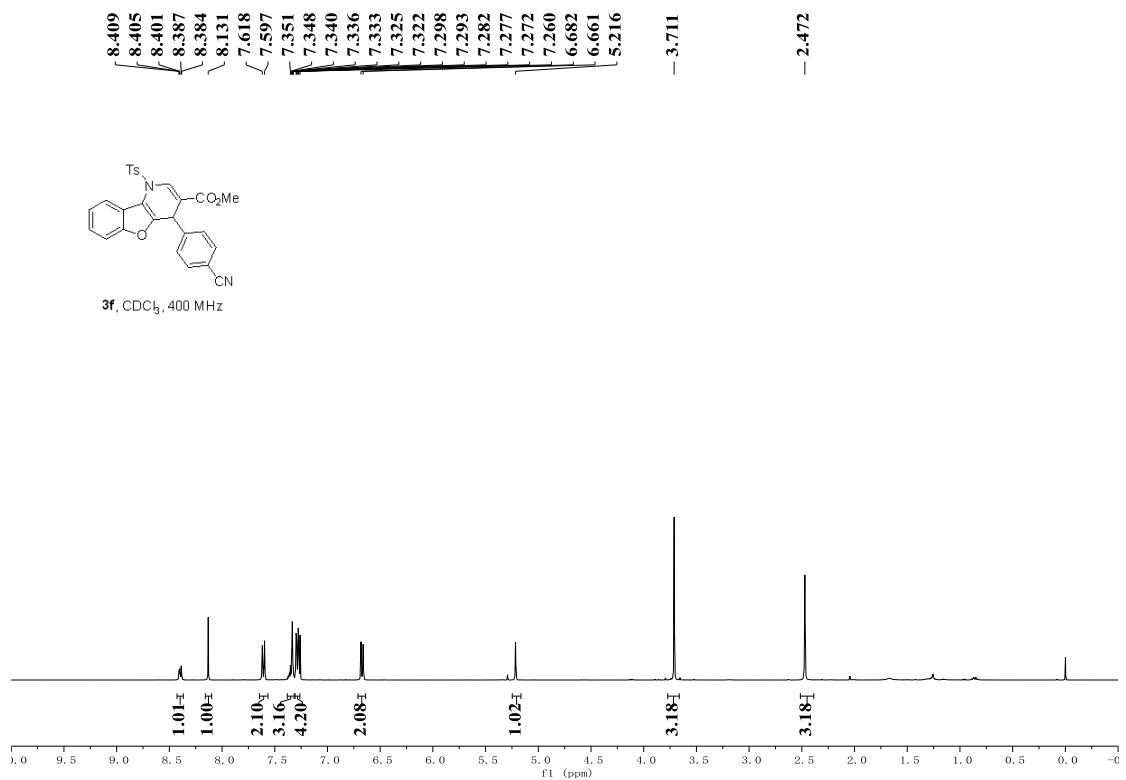

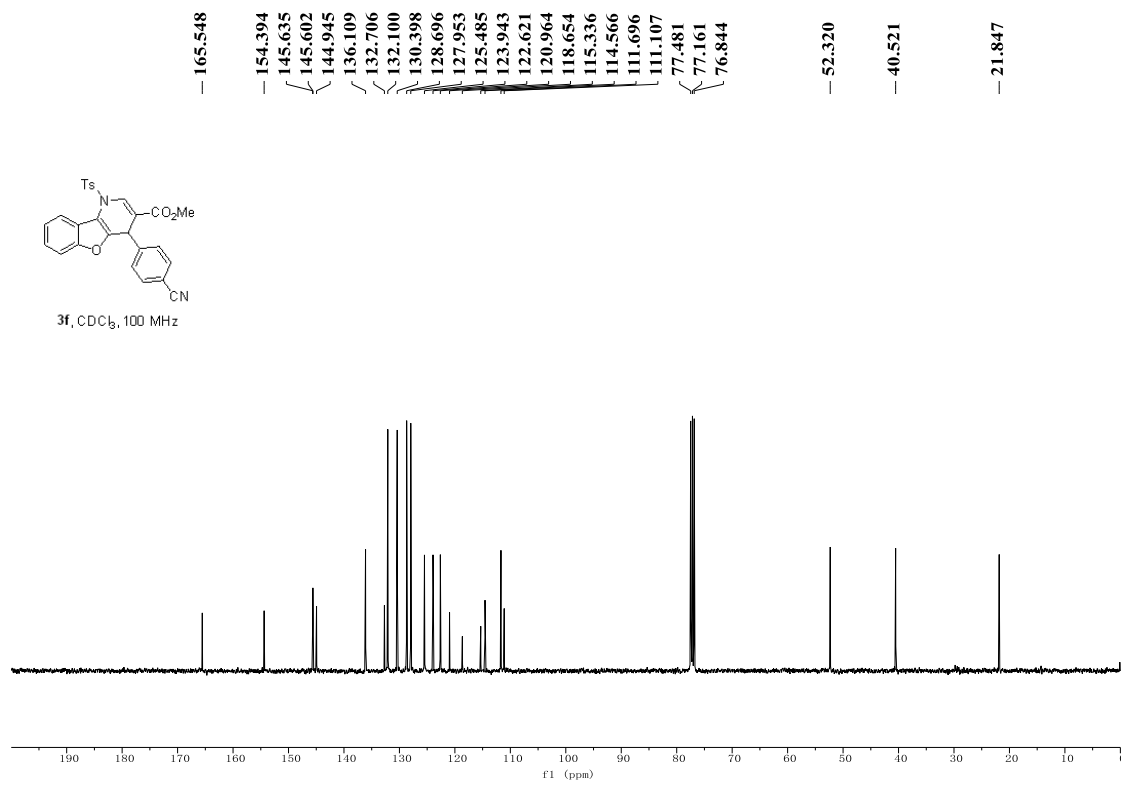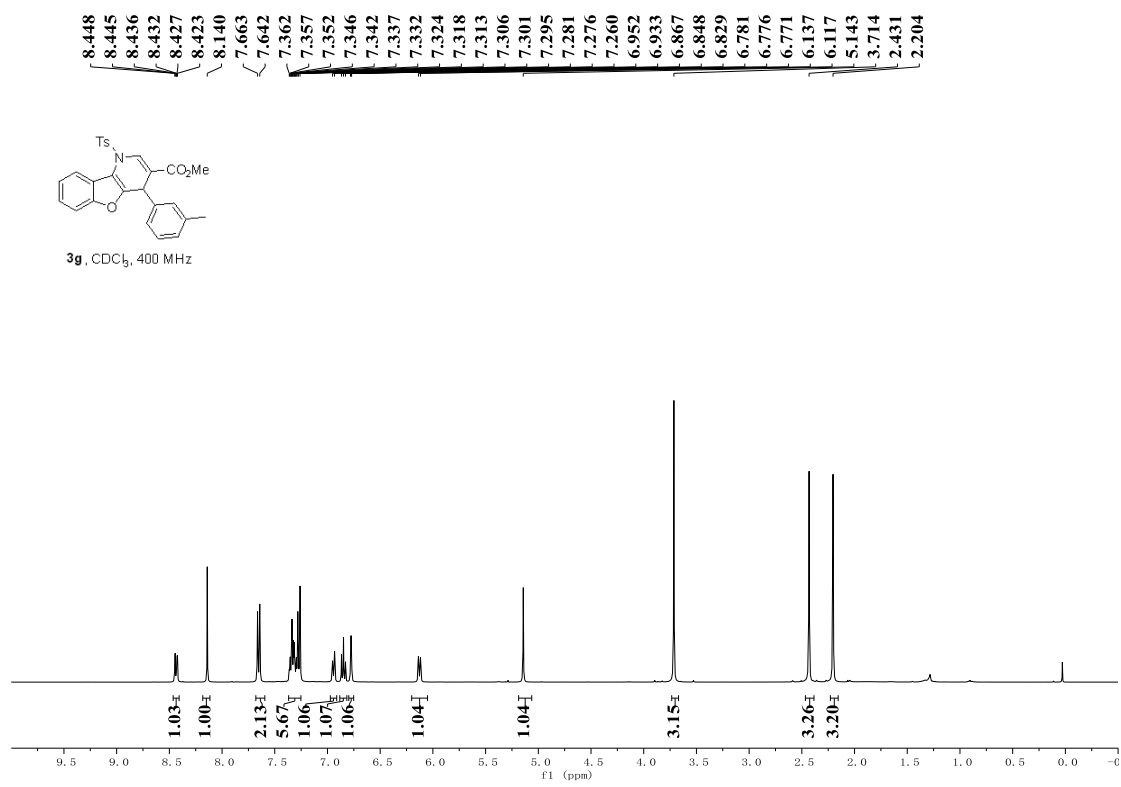

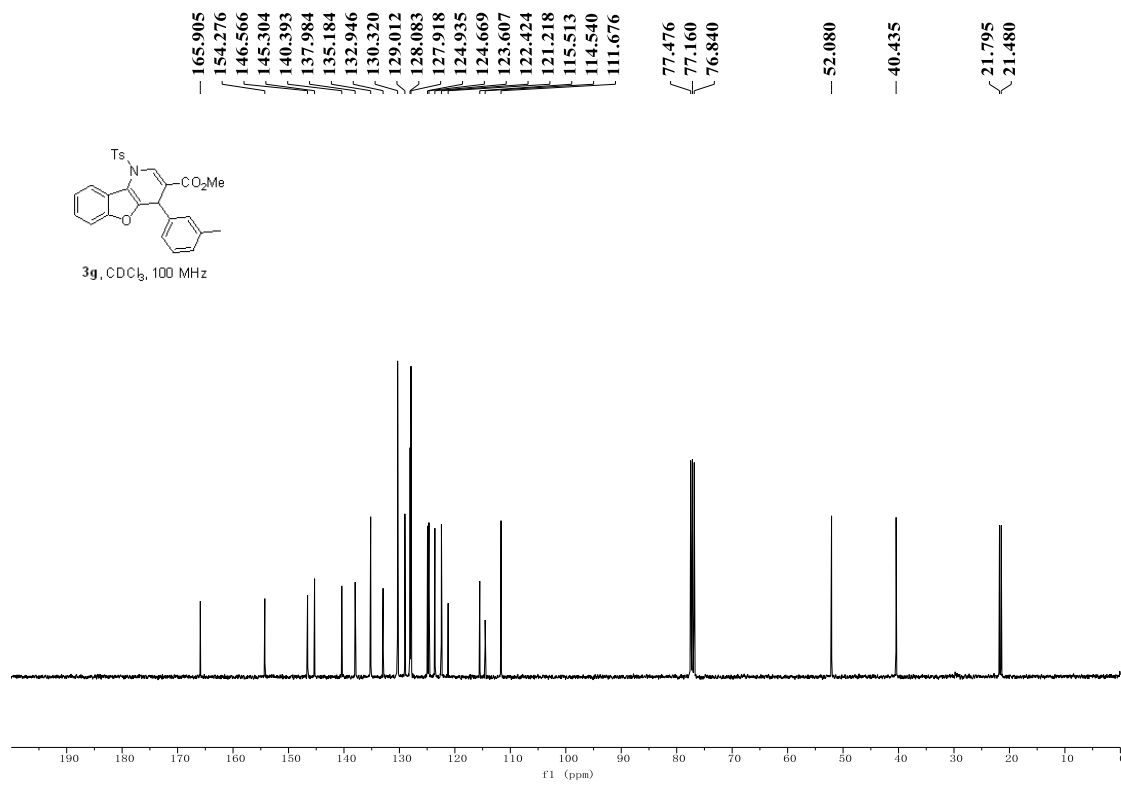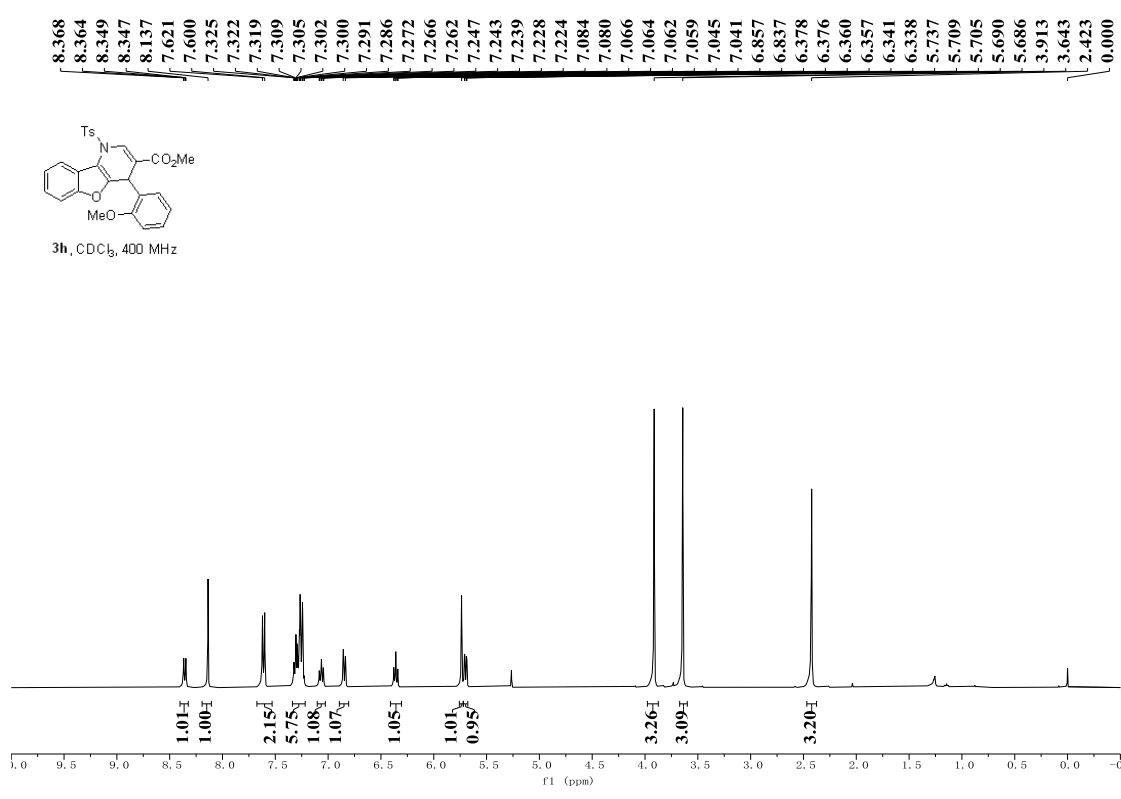

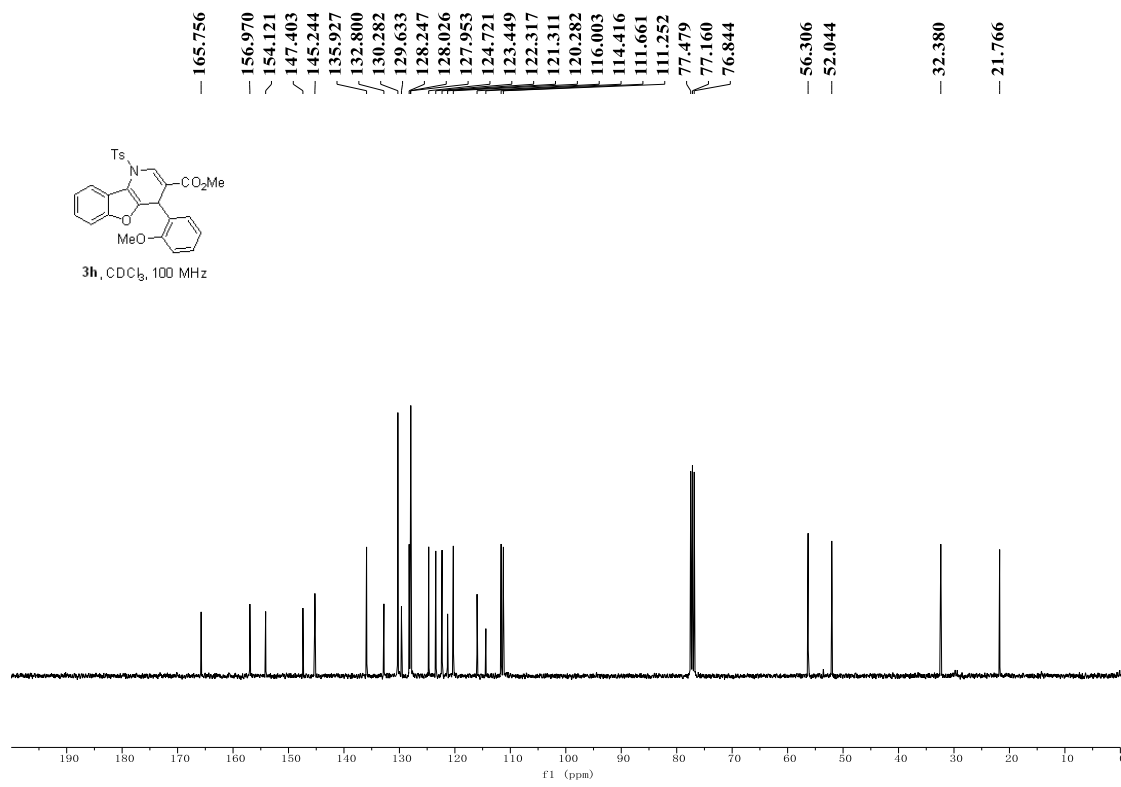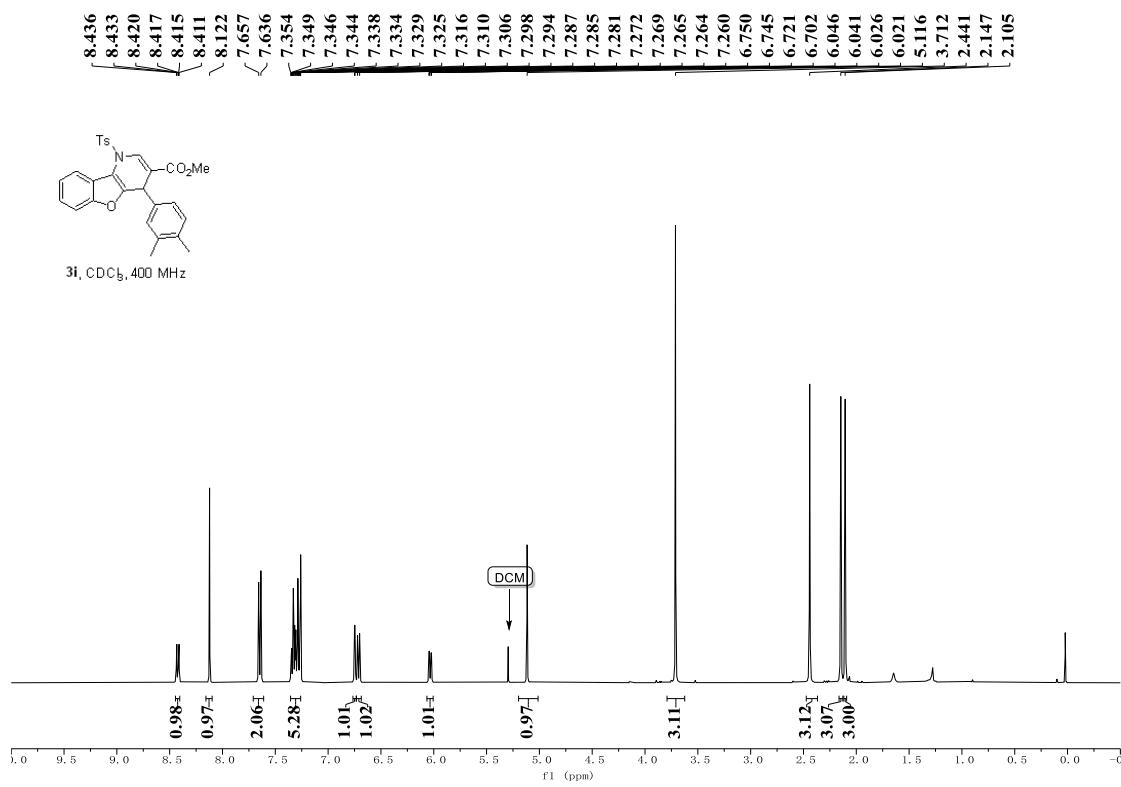



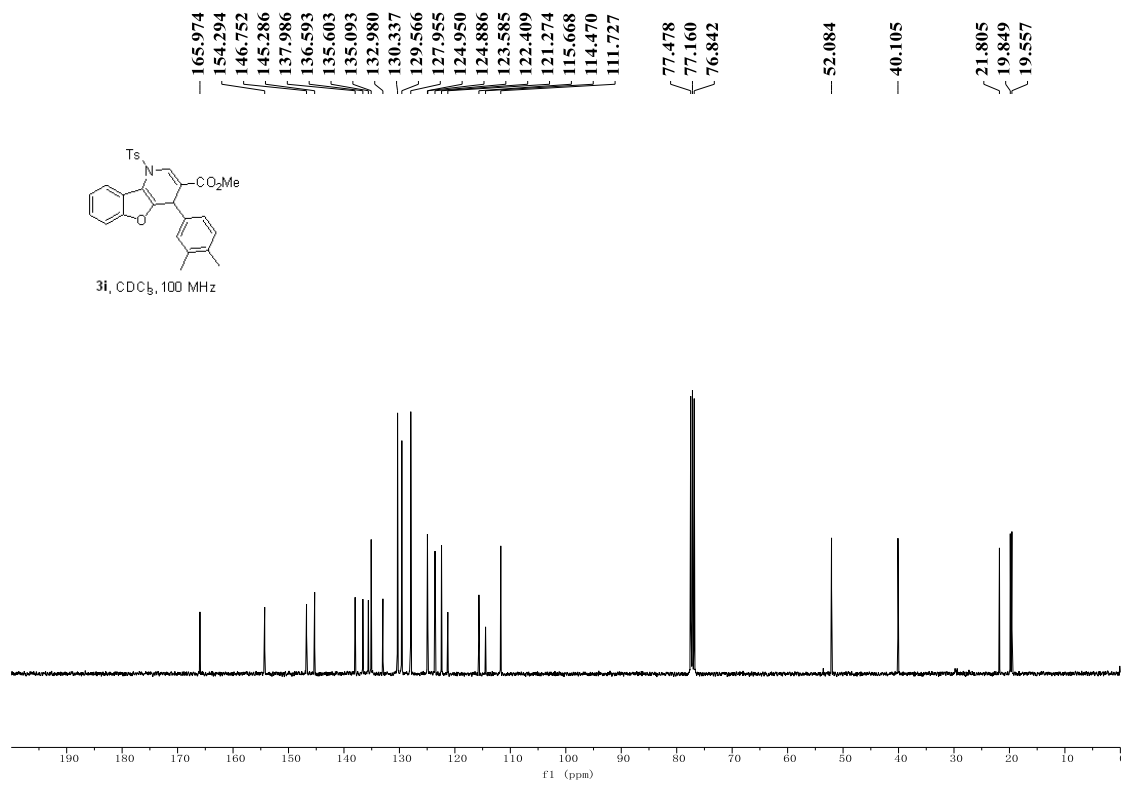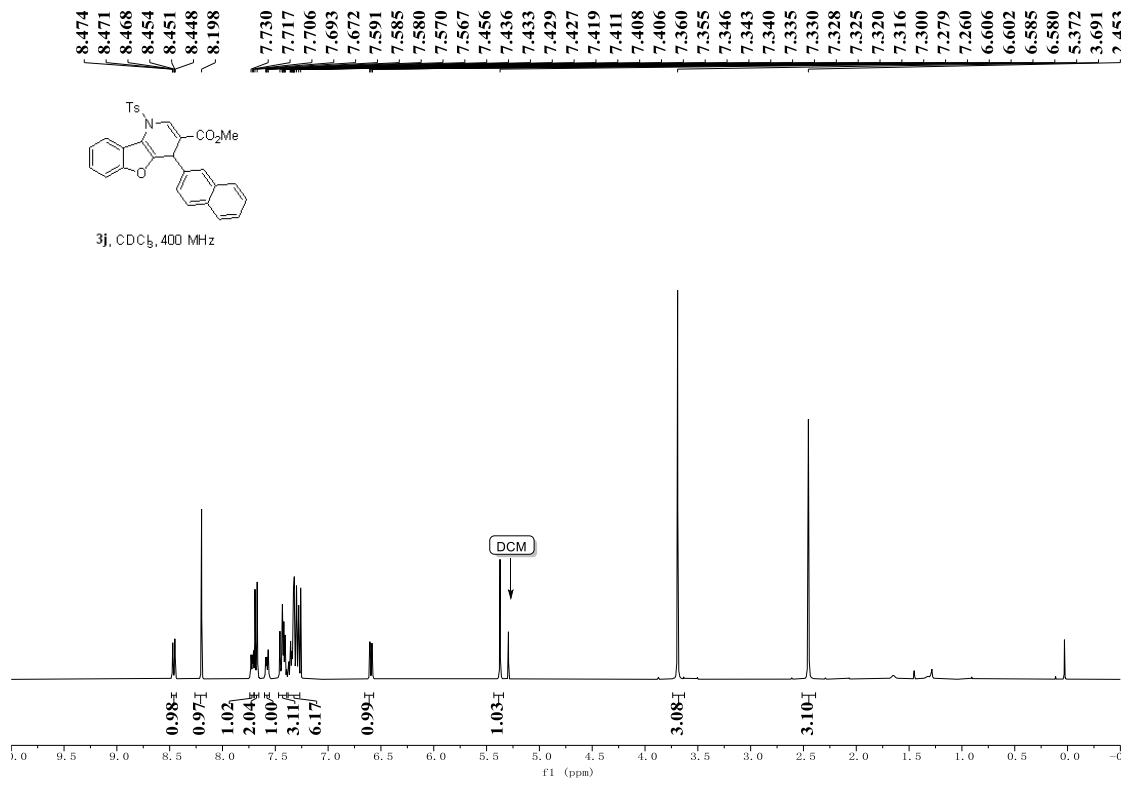

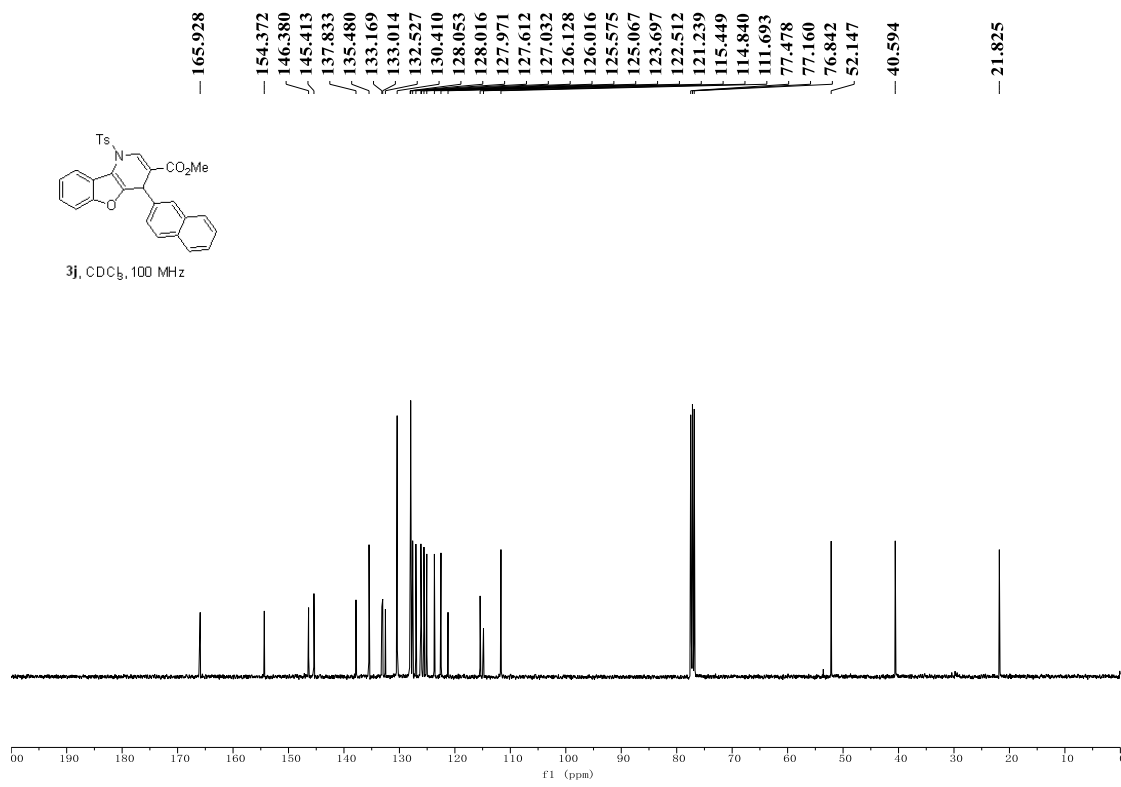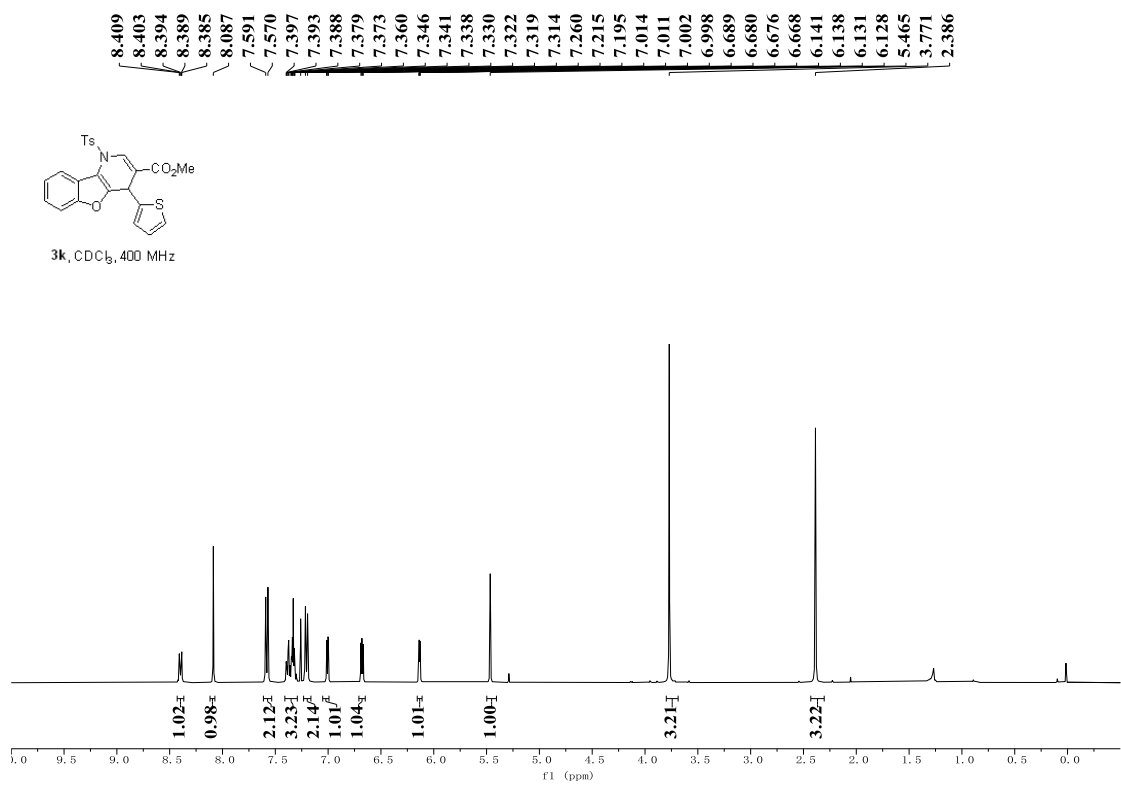

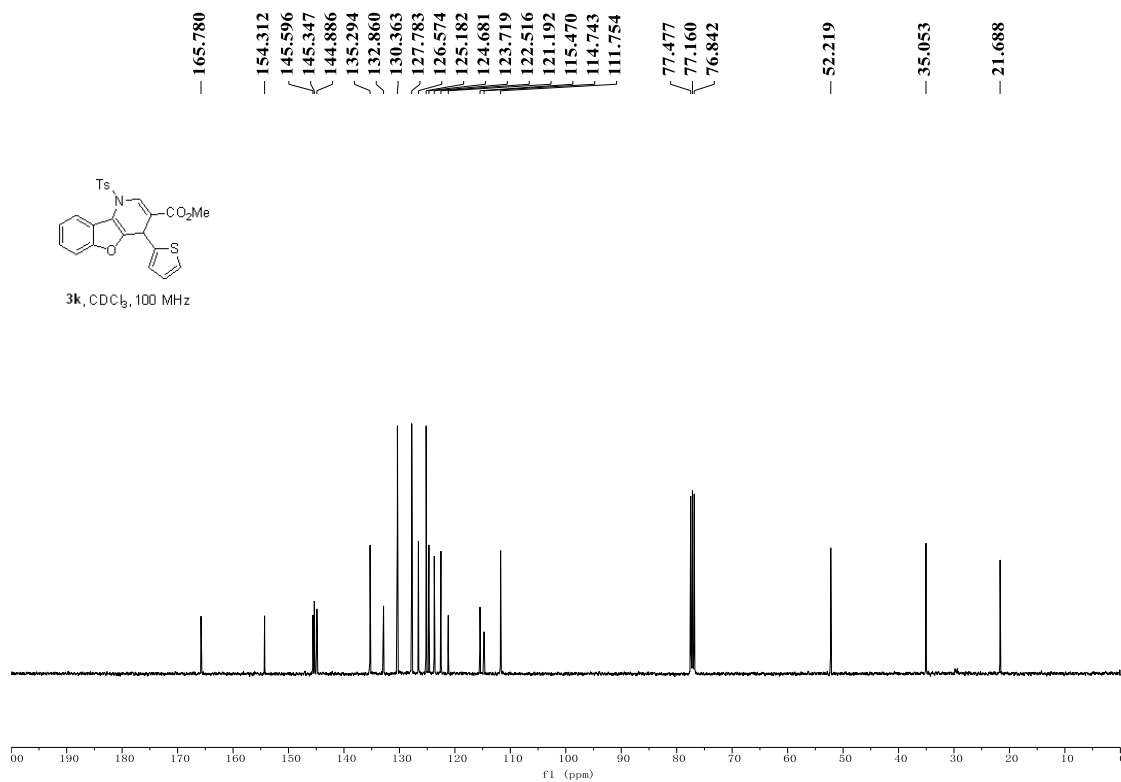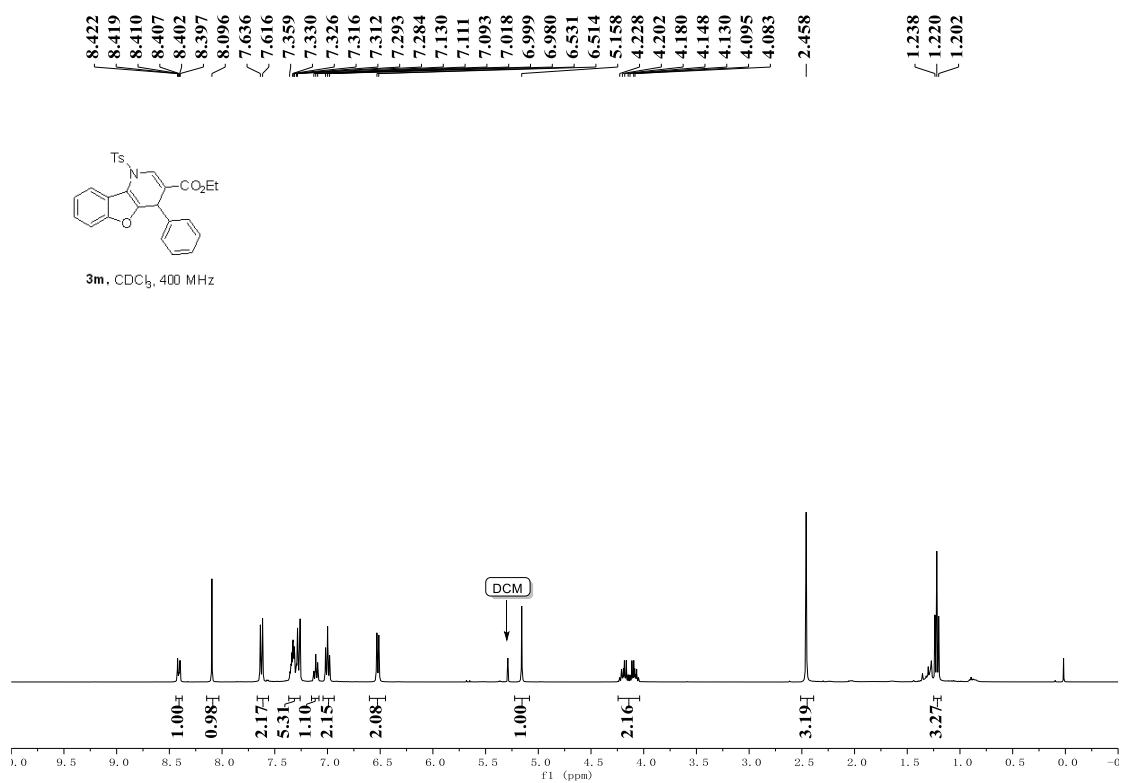

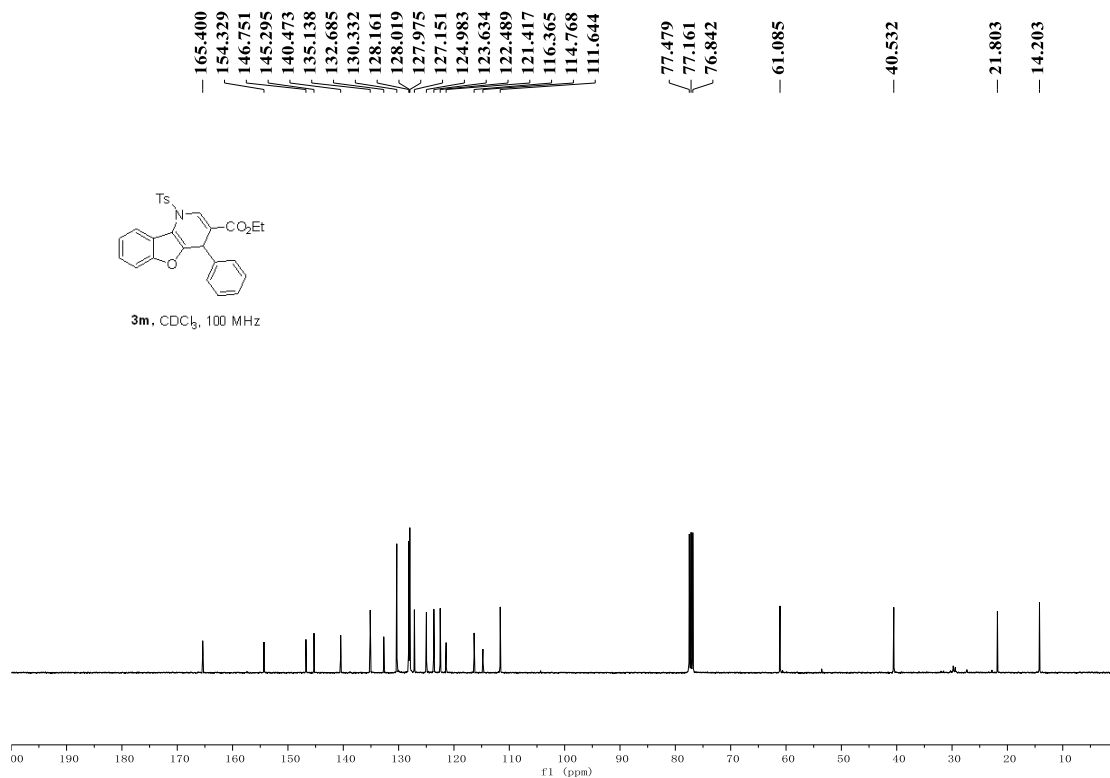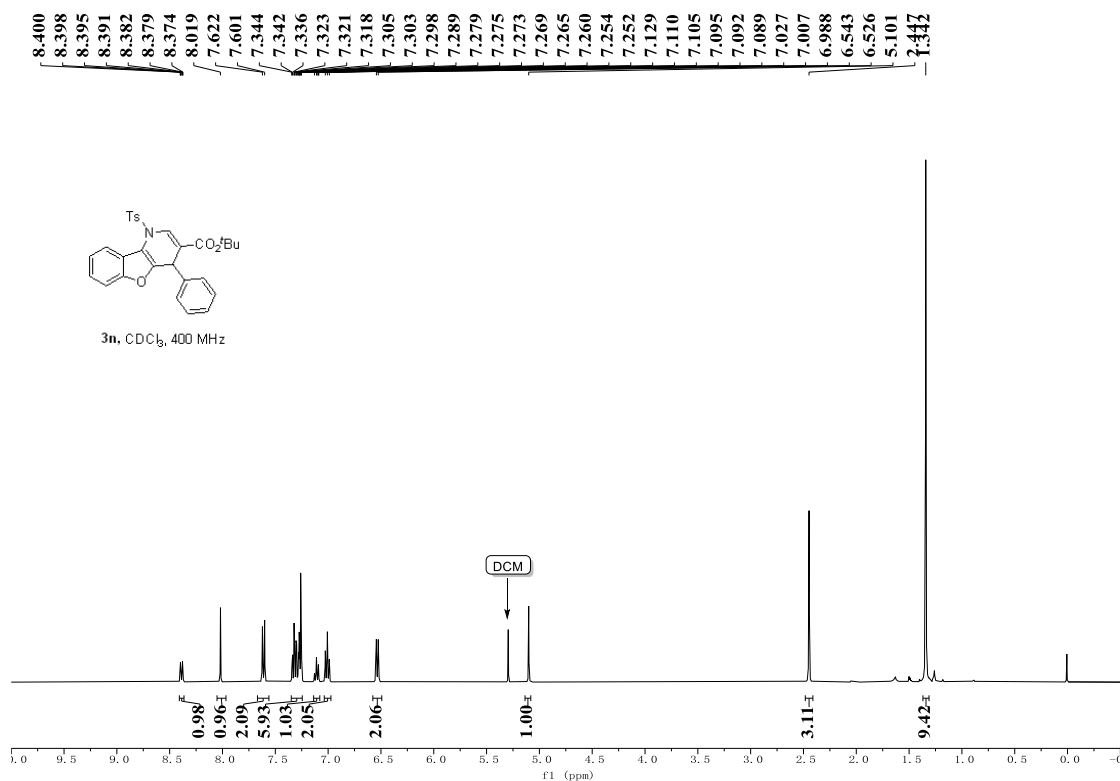

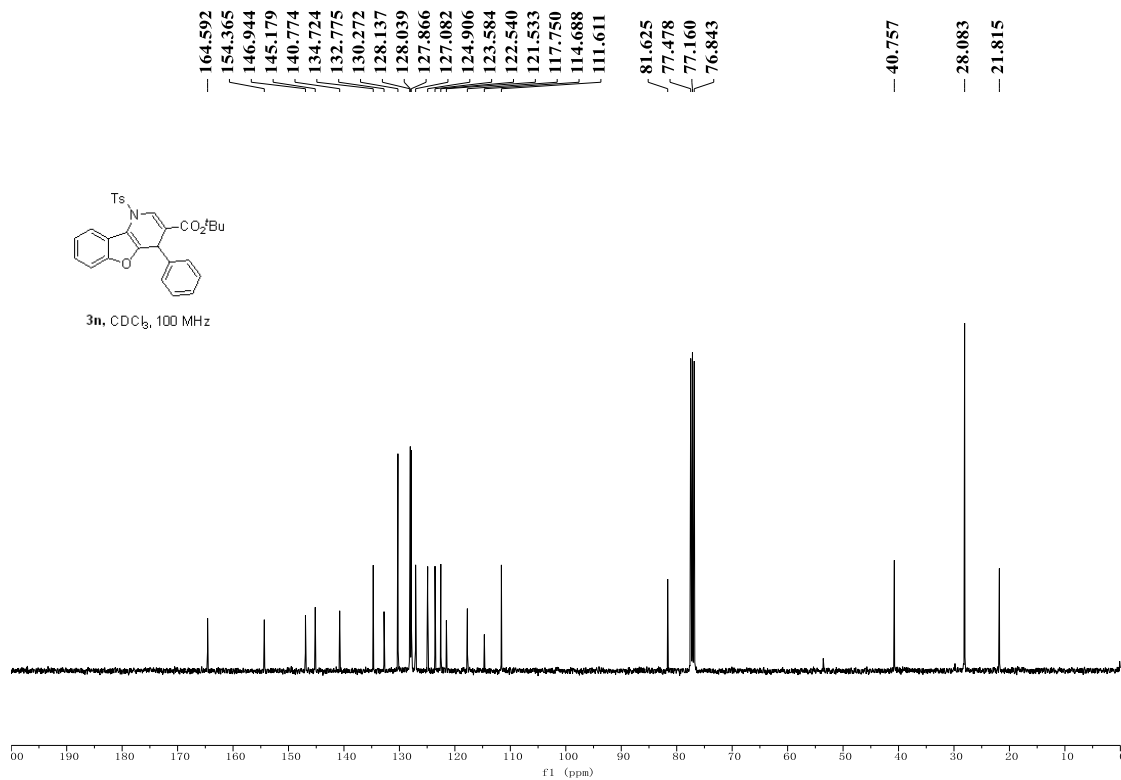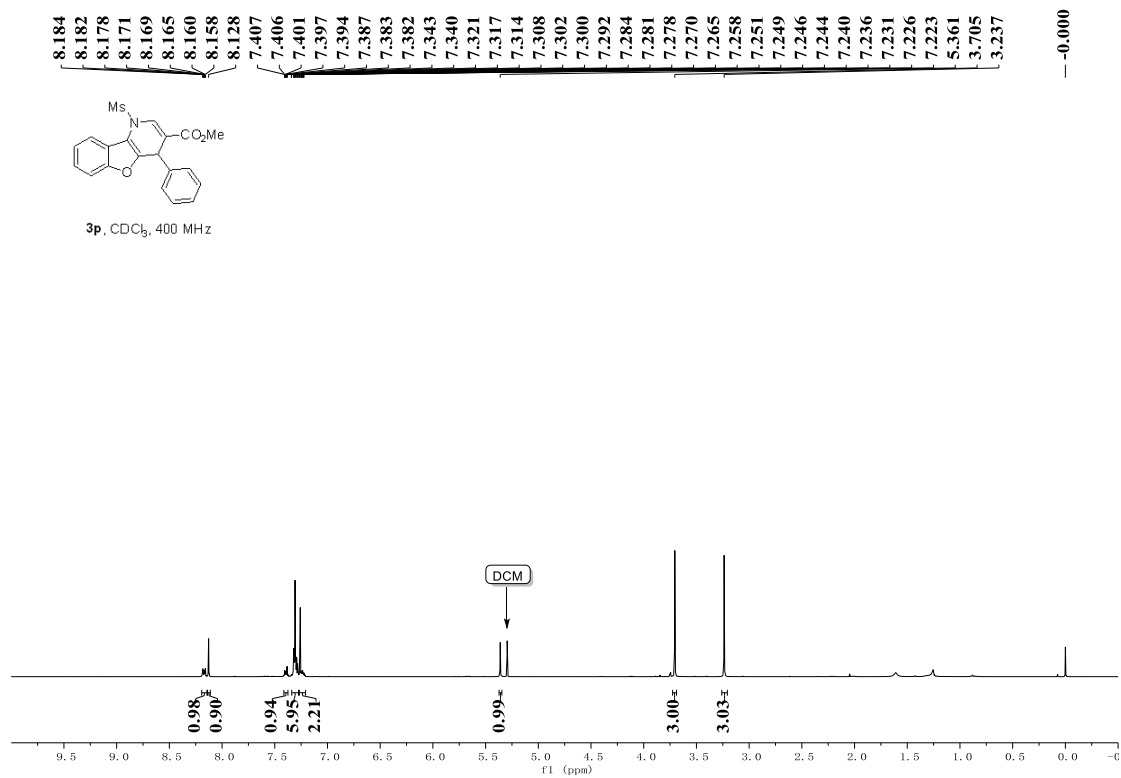

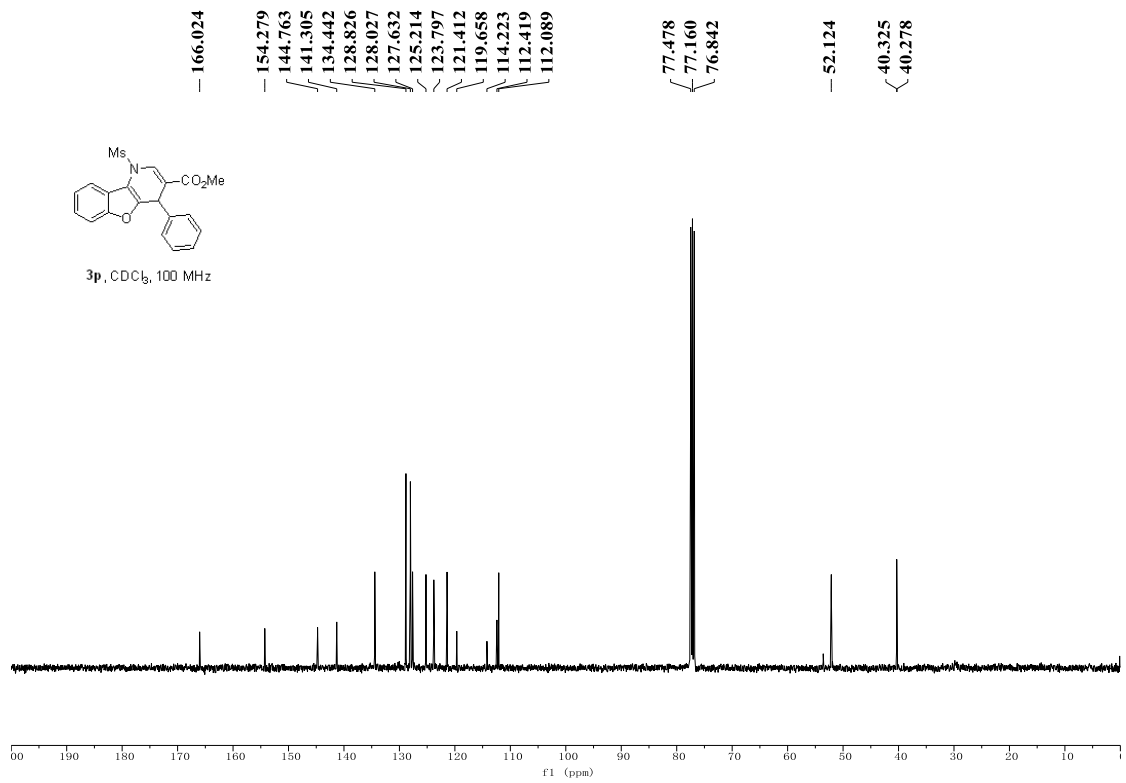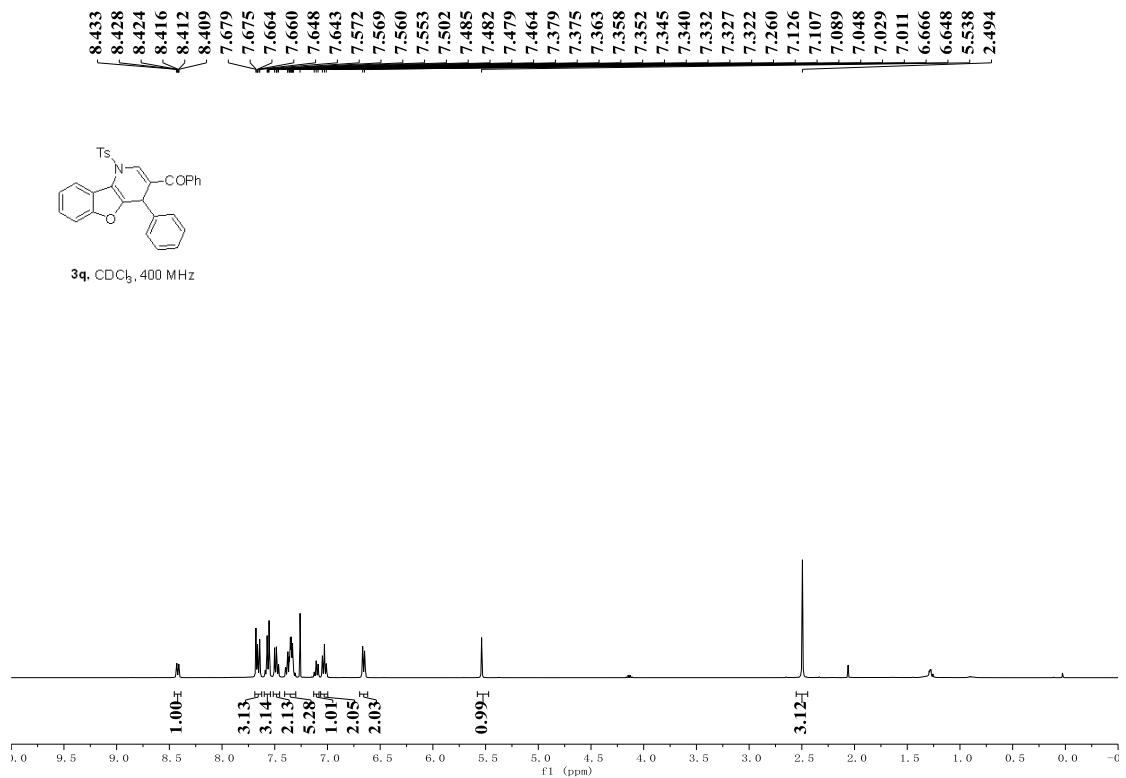

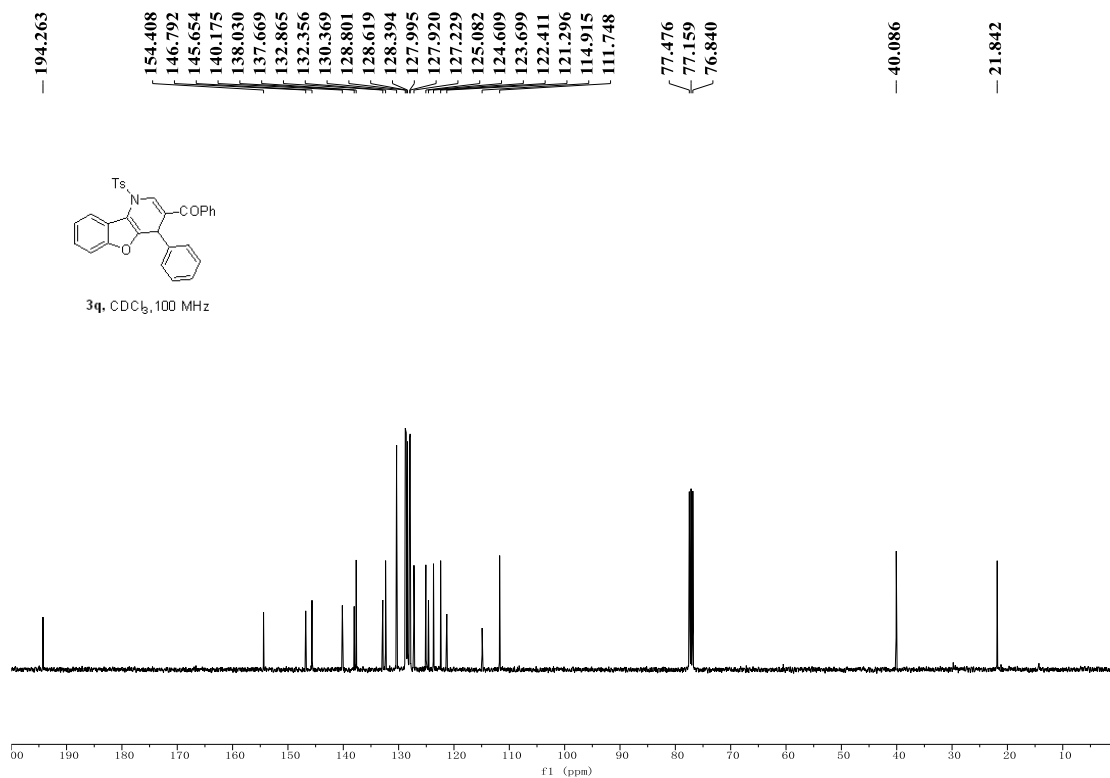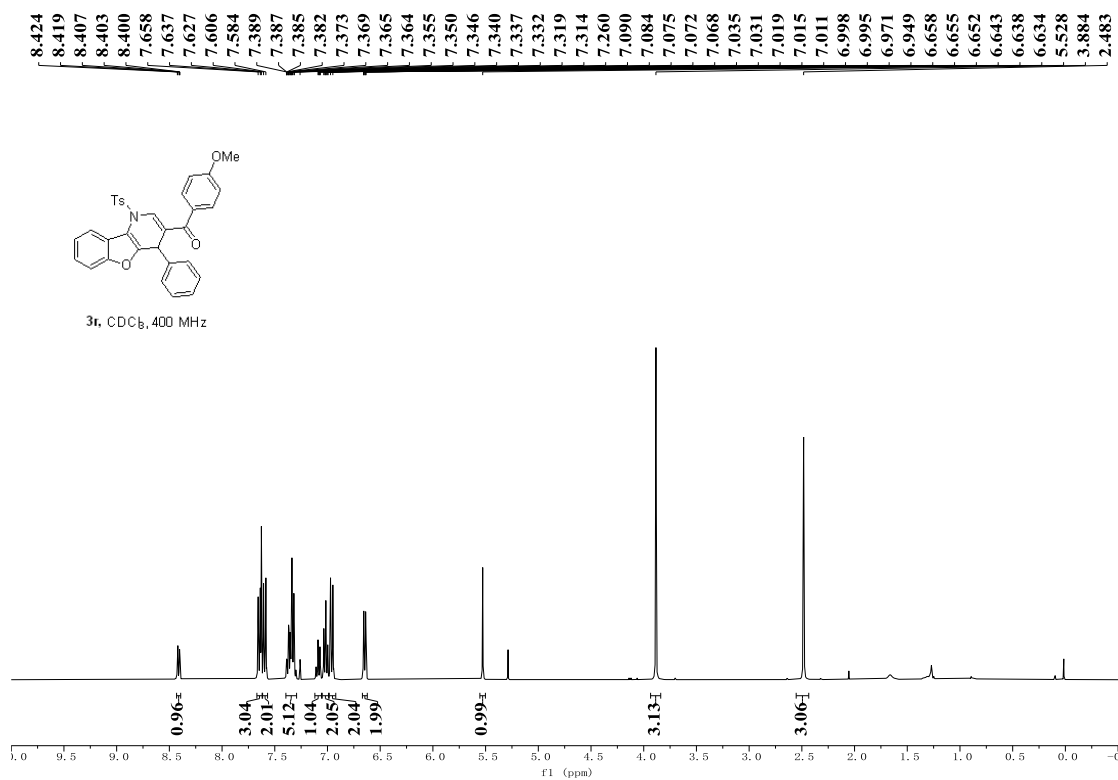

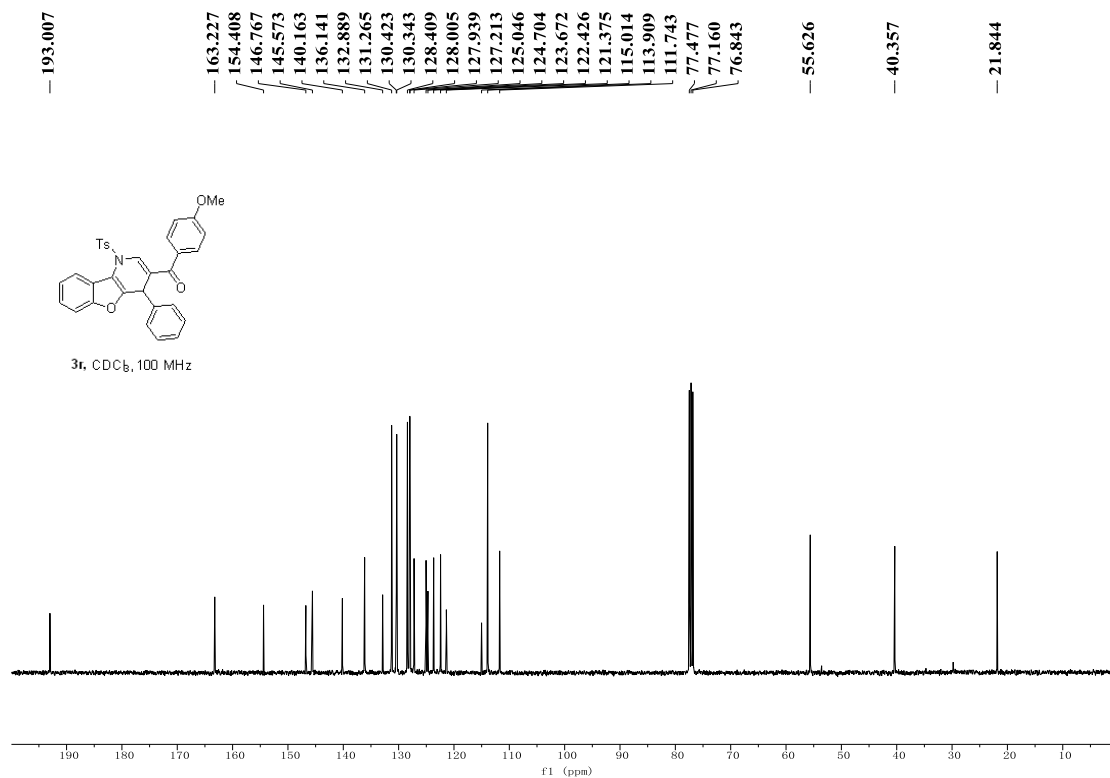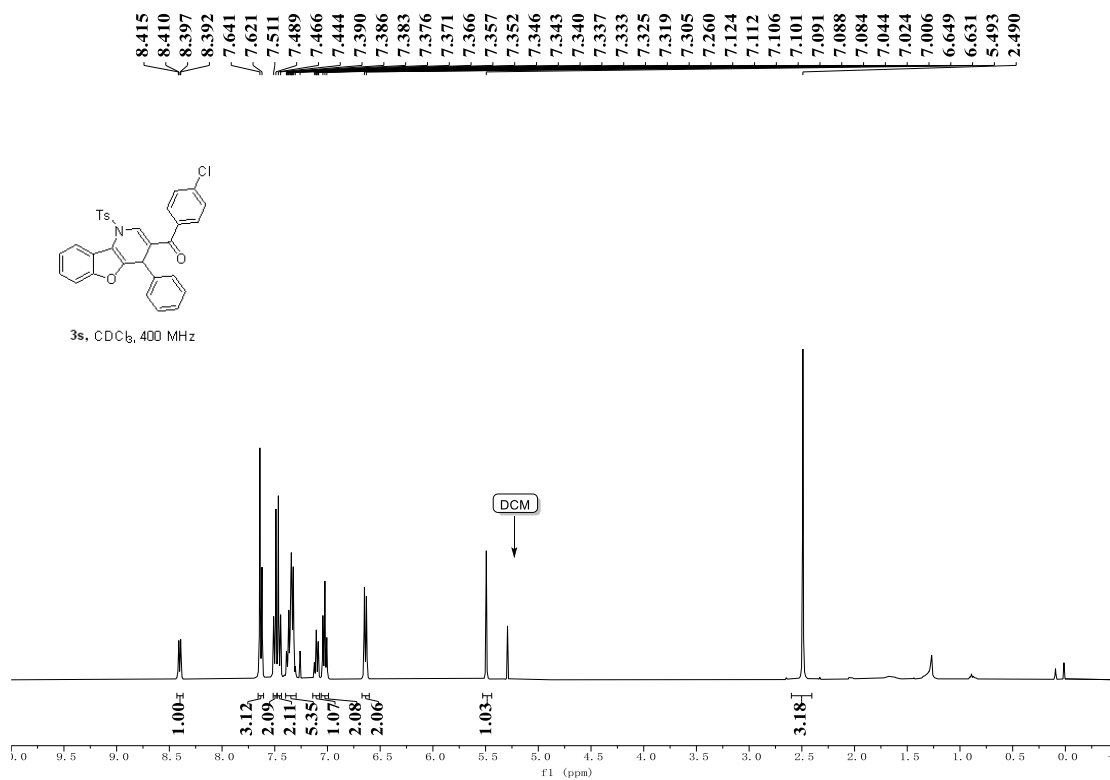



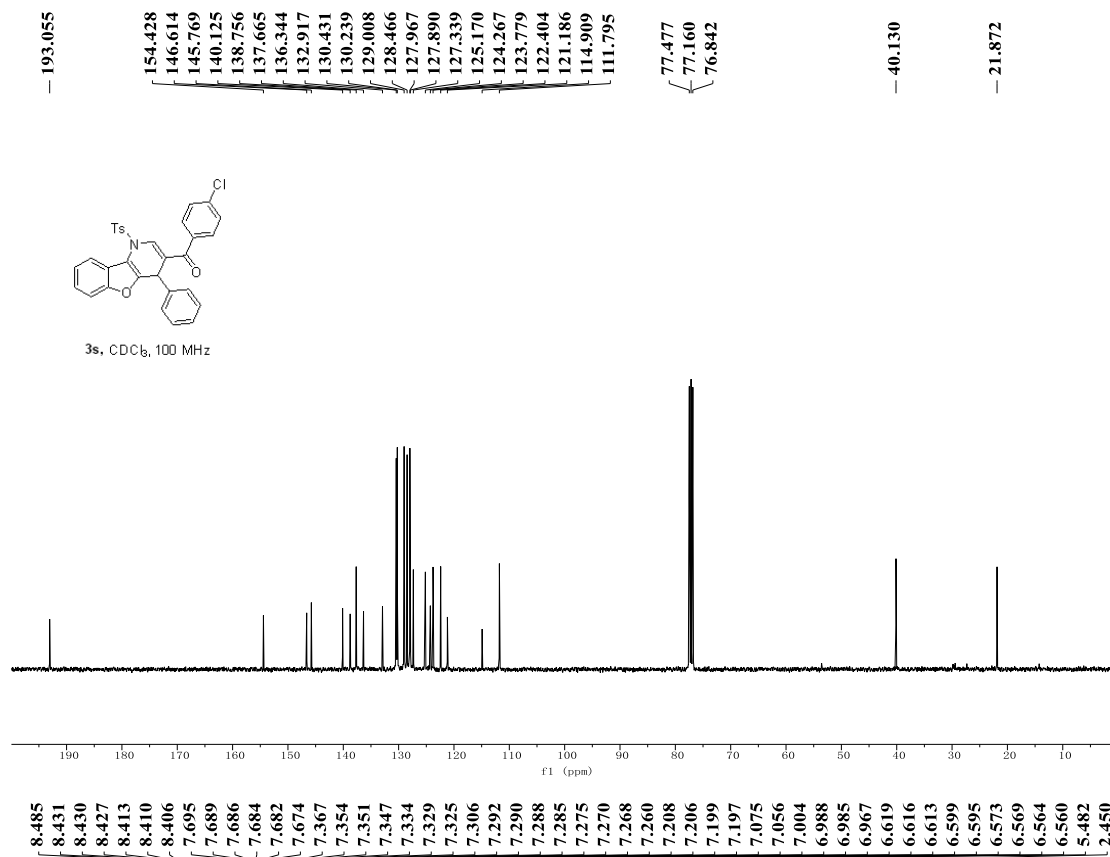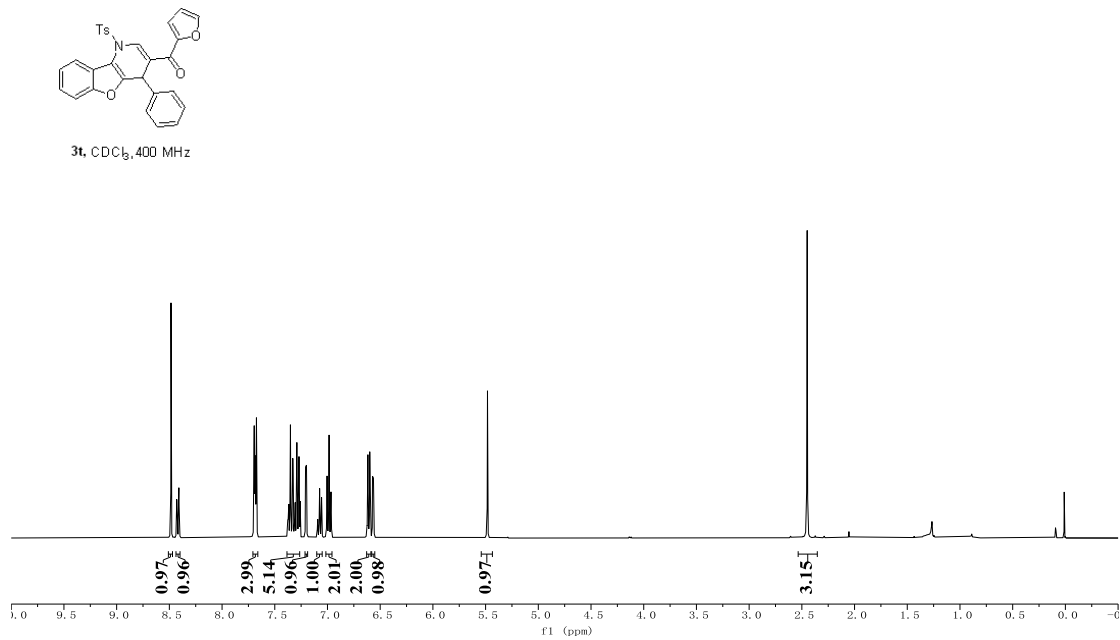

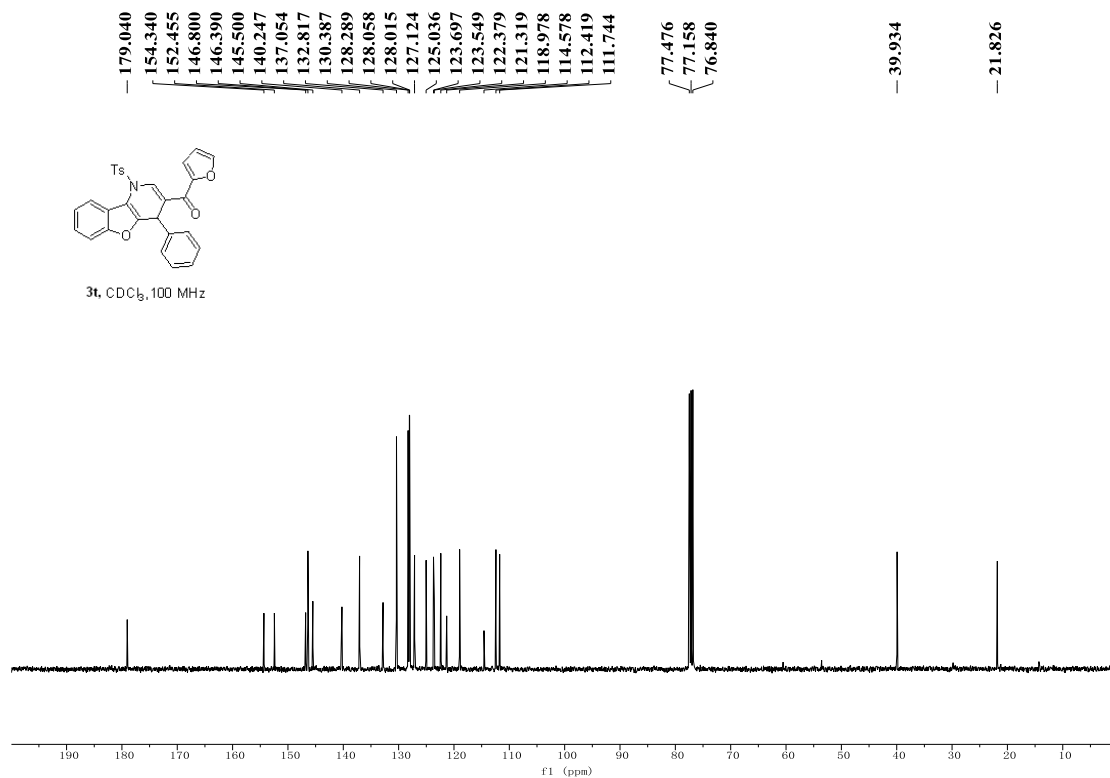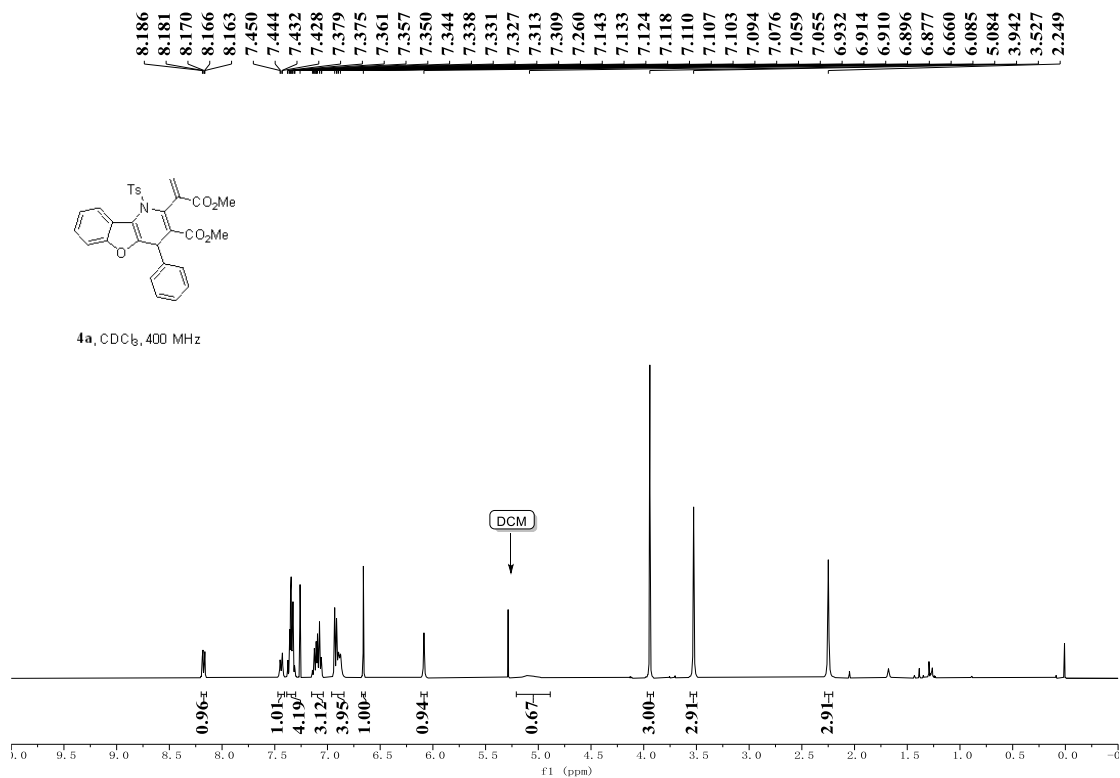

165.874  
 165.565  
 154.824  
 149.381  
 144.862  
 140.032  
 139.493  
 131.866  
 129.325  
 129.103  
 128.684  
 128.428  
 127.181  
 126.342  
 124.783  
 123.640  
 123.381  
 122.107  
 117.410  
 111.622

77.478  
 77.160  
 76.842

52.349  
 52.176

41.017

21.734

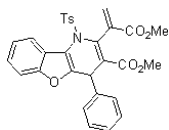

4a, CDCl<sub>3</sub>, 100 MHz

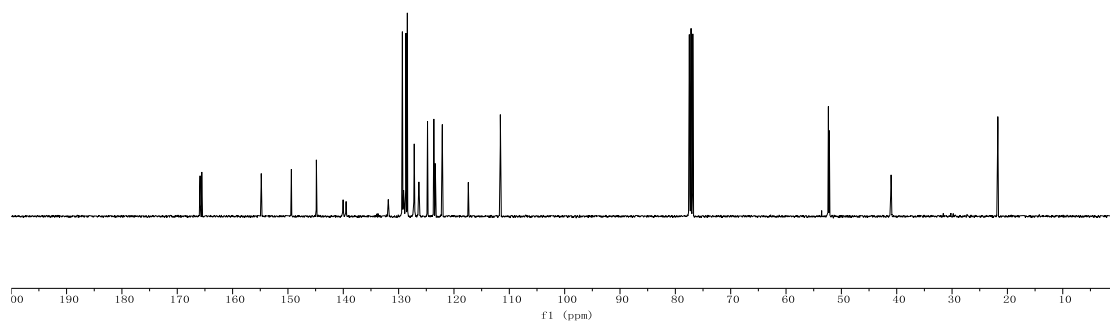

8.176  
 8.171  
 8.160  
 8.156  
 8.153  
 7.432  
 7.429  
 7.426  
 7.413  
 7.408  
 7.372  
 7.369  
 7.355  
 7.350  
 7.340  
 7.337  
 7.334  
 7.331  
 7.321  
 7.316  
 7.302  
 7.298  
 7.260  
 6.955  
 6.935  
 6.828  
 6.807  
 6.645  
 6.643  
 6.633  
 6.611  
 6.082  
 4.953  
 3.929  
 3.754  
 3.524  
 2.282

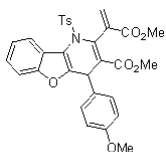

4b, CDCl<sub>3</sub>, 400 MHz

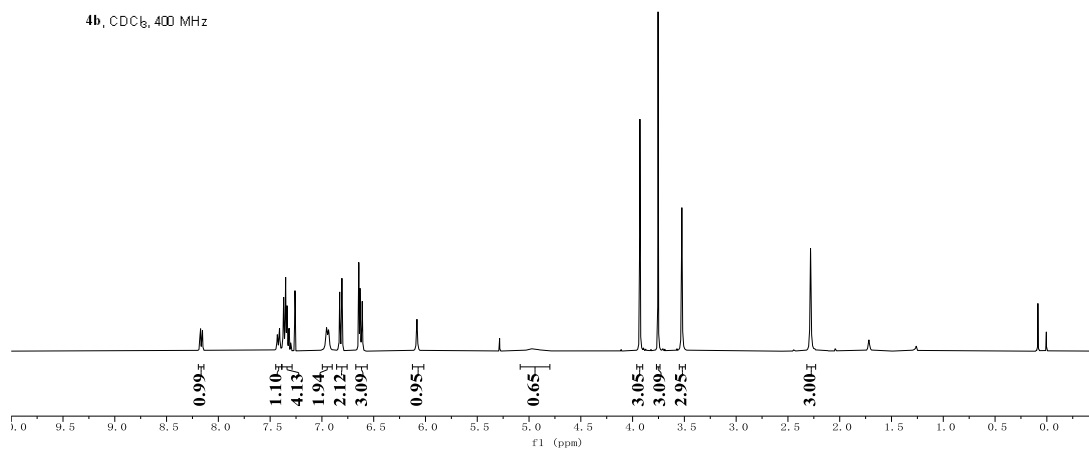

165.941  
165.562  
158.229  
154.727  
149.587  
144.956  
139.432  
132.318  
131.815  
129.297  
129.082  
128.728  
128.393  
124.723  
123.600  
123.376  
122.053  
117.243  
113.768  
111.601

77.478  
77.160  
76.840

55.186  
52.340  
52.137

40.359

21.617

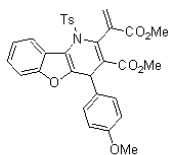

4b, CDCl<sub>3</sub>, 100 MHz

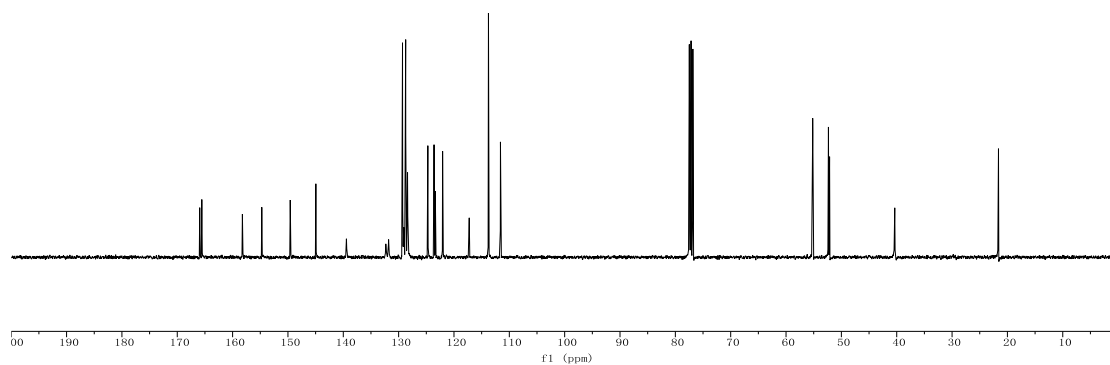

8.182  
8.177  
8.174  
8.169  
8.163  
8.159  
7.464  
7.460  
7.454  
7.447  
7.441  
7.379  
7.365  
7.360  
7.351  
7.342  
7.336  
7.323  
7.318  
7.298  
7.260  
6.923  
6.918  
6.909  
6.901  
6.888  
6.880  
6.775  
6.770  
6.759  
6.754  
6.748  
6.737  
6.732  
6.656  
6.077  
5.103  
3.944  
3.551  
2.264

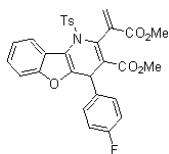

4c, CDCl<sub>3</sub>, 400 MHz

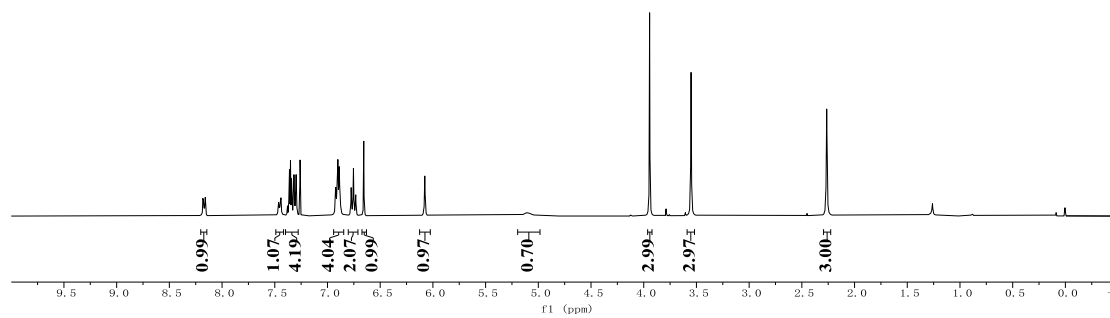

165.764  
165.567  
162.635  
160.198  
154.852  
149.199  
145.138  
139.409  
136.312  
132.047  
129.249  
129.158  
128.661  
124.901  
123.730  
123.336  
122.160  
117.497  
115.316  
115.103  
111.620

77.477  
77.160  
76.841

52.377  
52.239

40.158

21.548

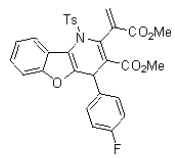

4c, CDCl<sub>3</sub>, 100 MHz

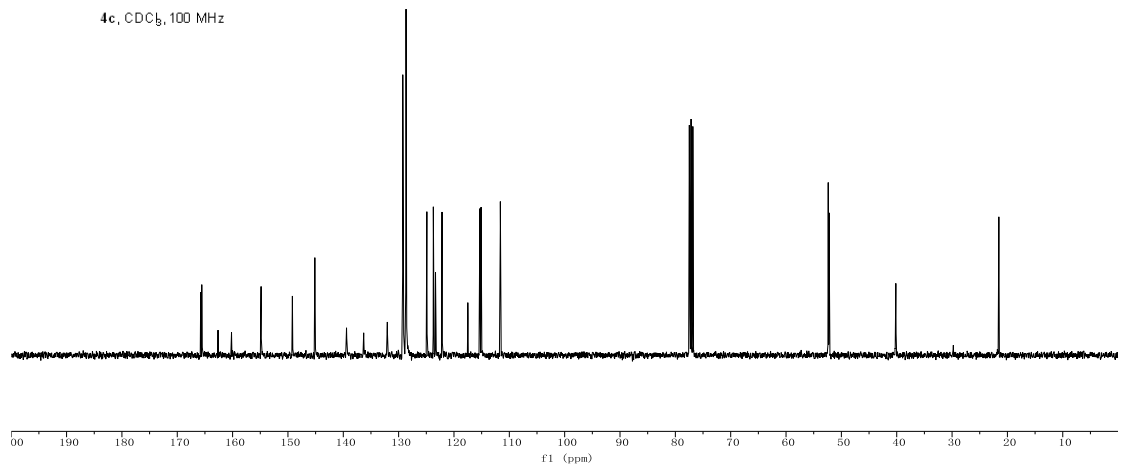

-116.410

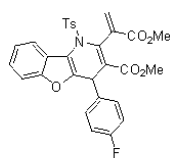

4c, CDCl<sub>3</sub>, 376 MHz

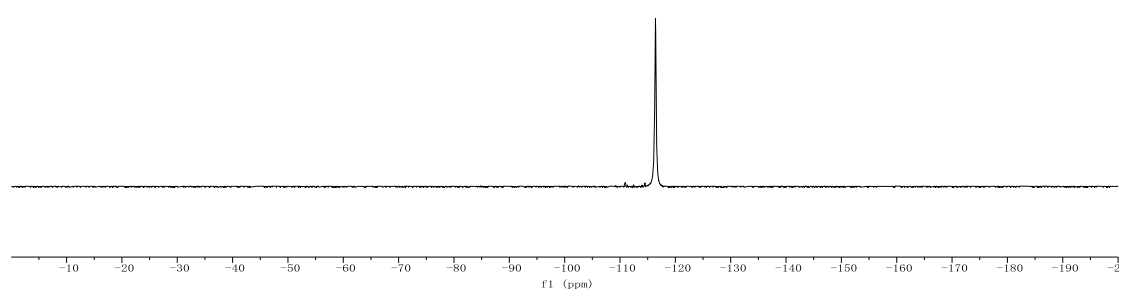

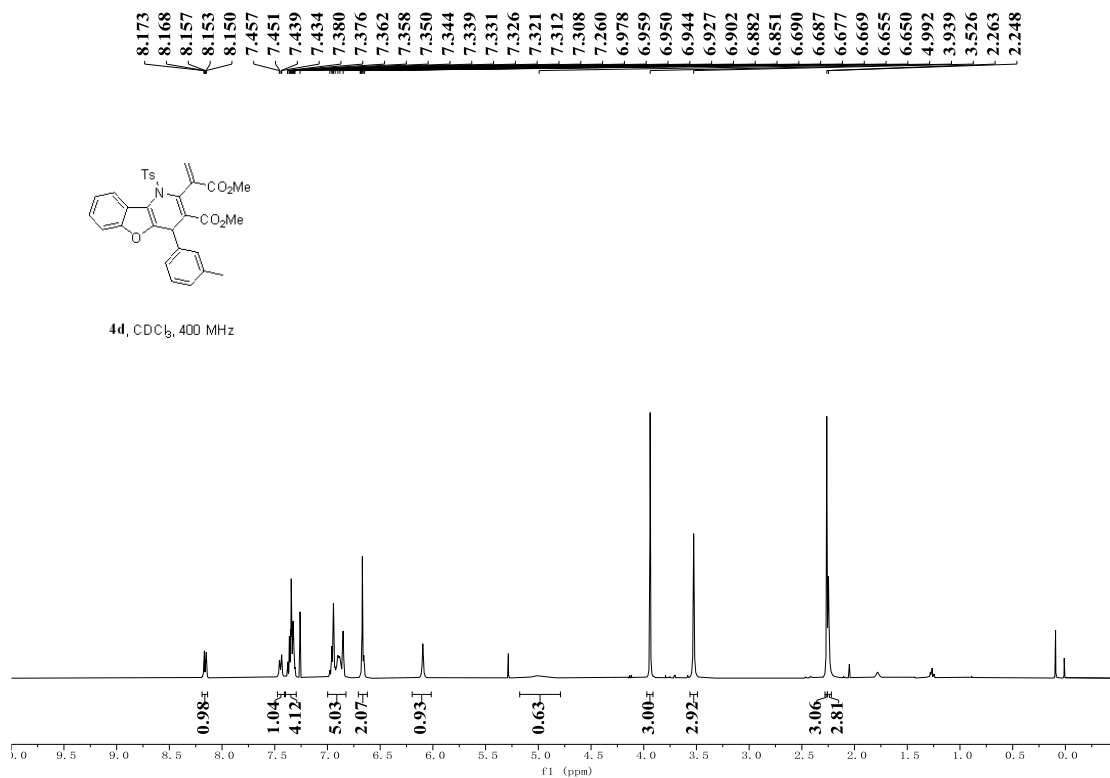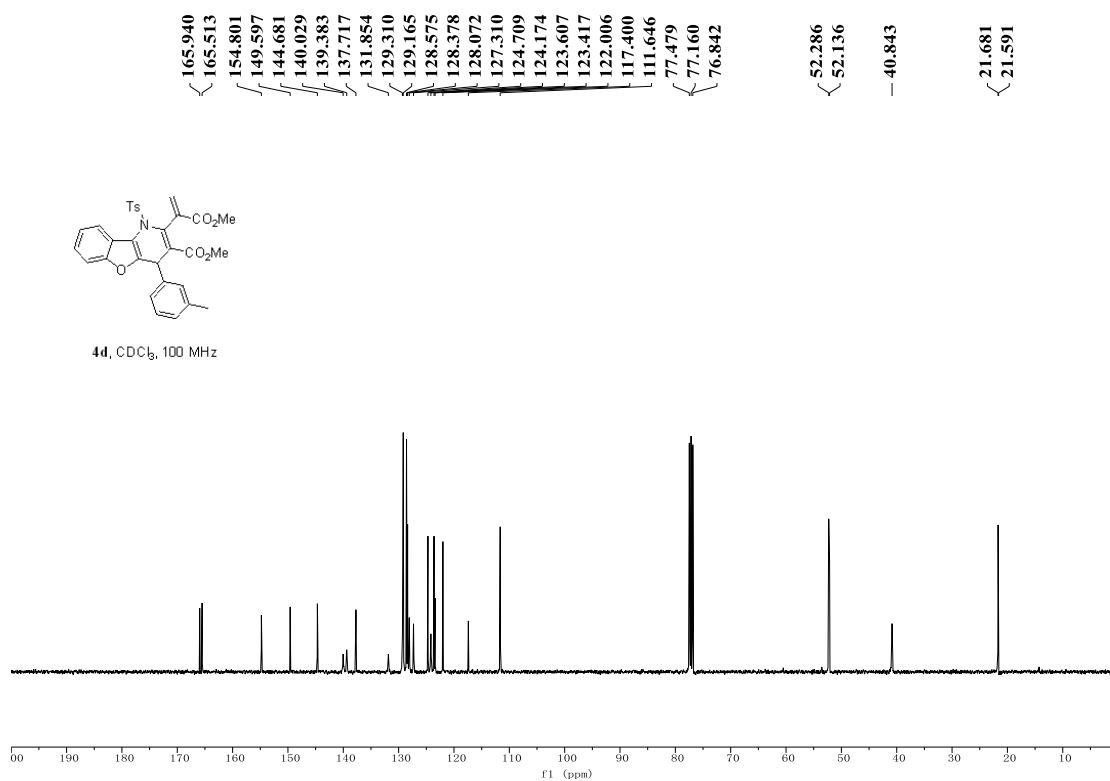

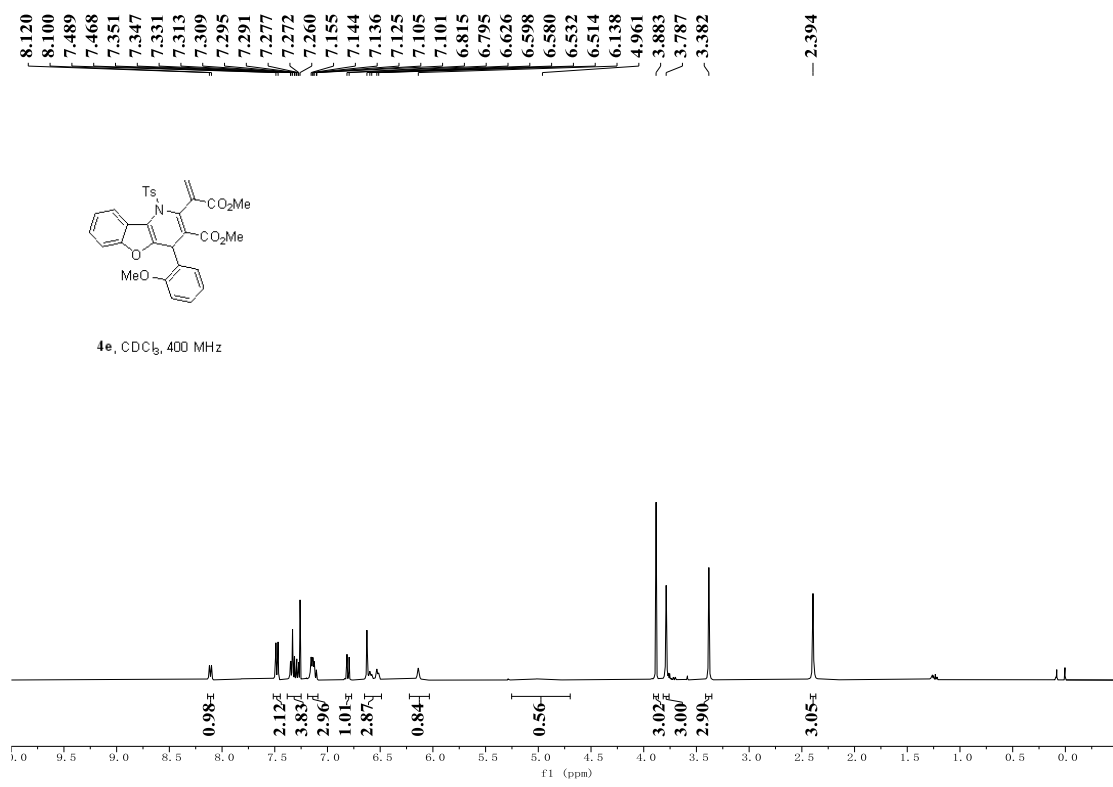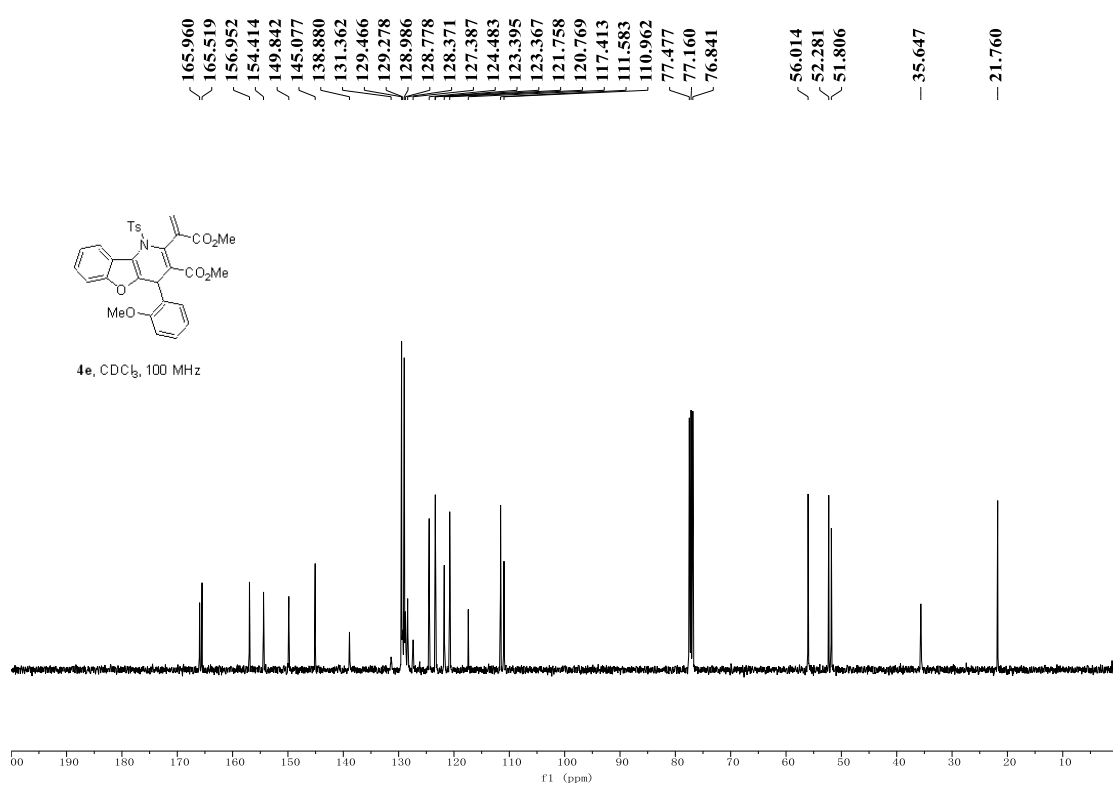

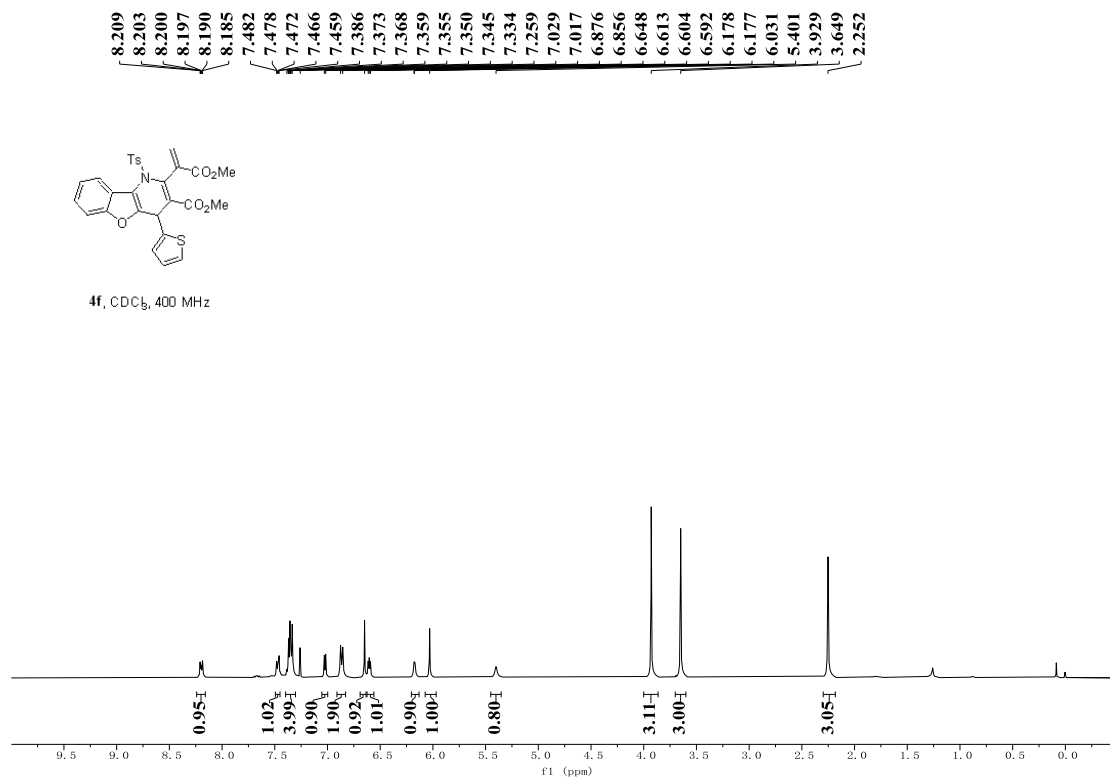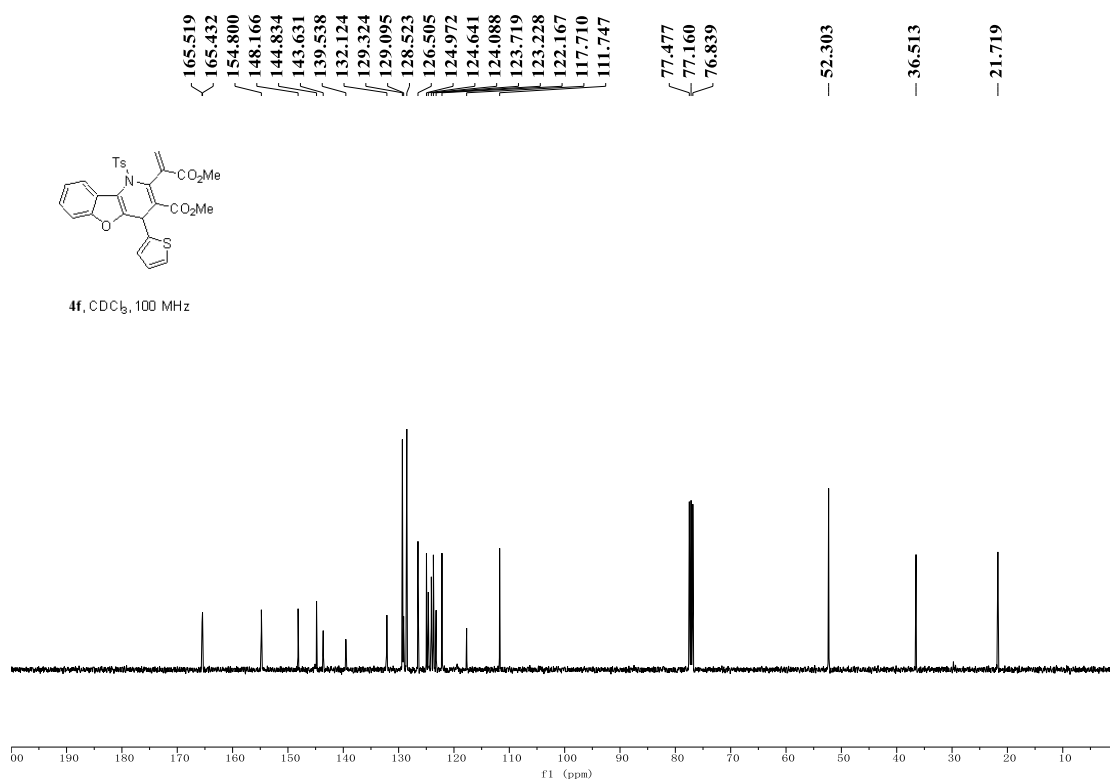



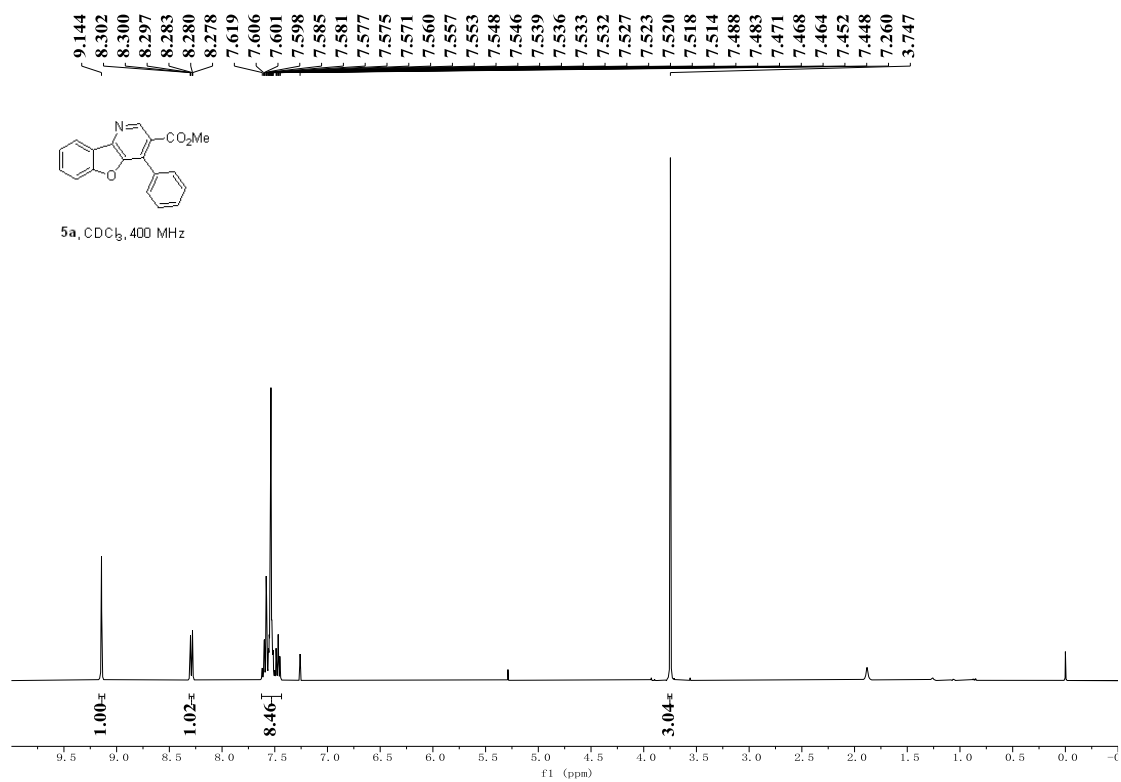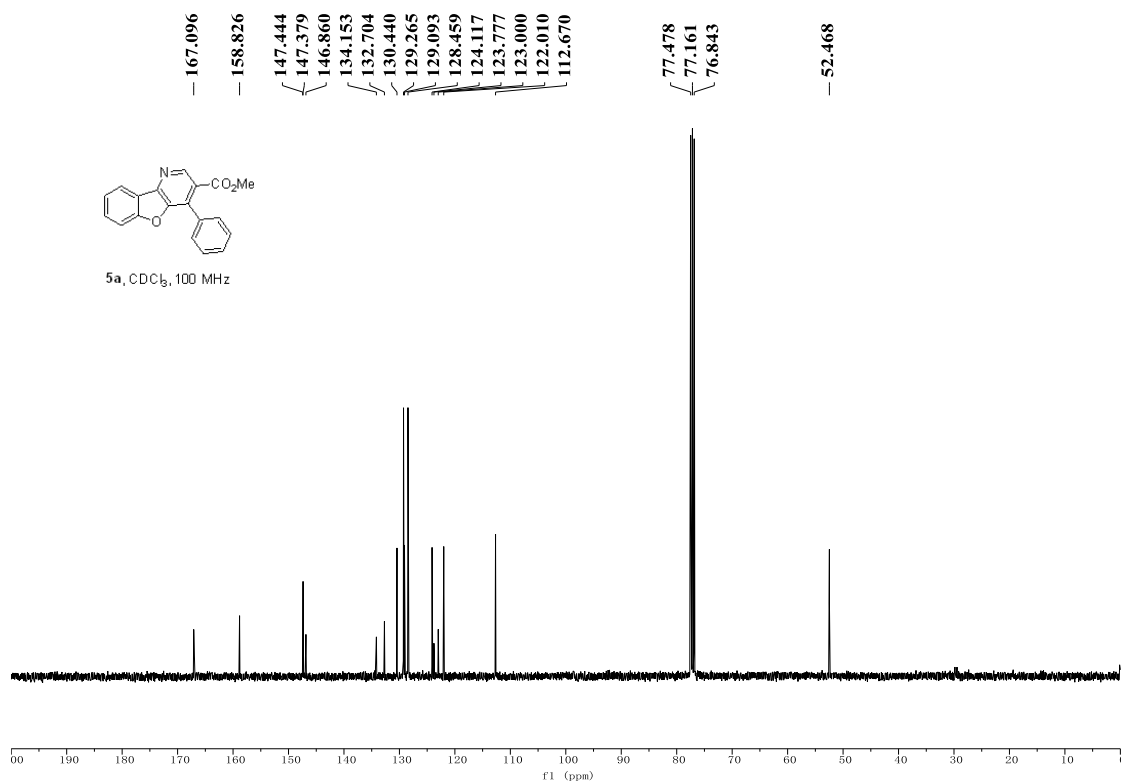

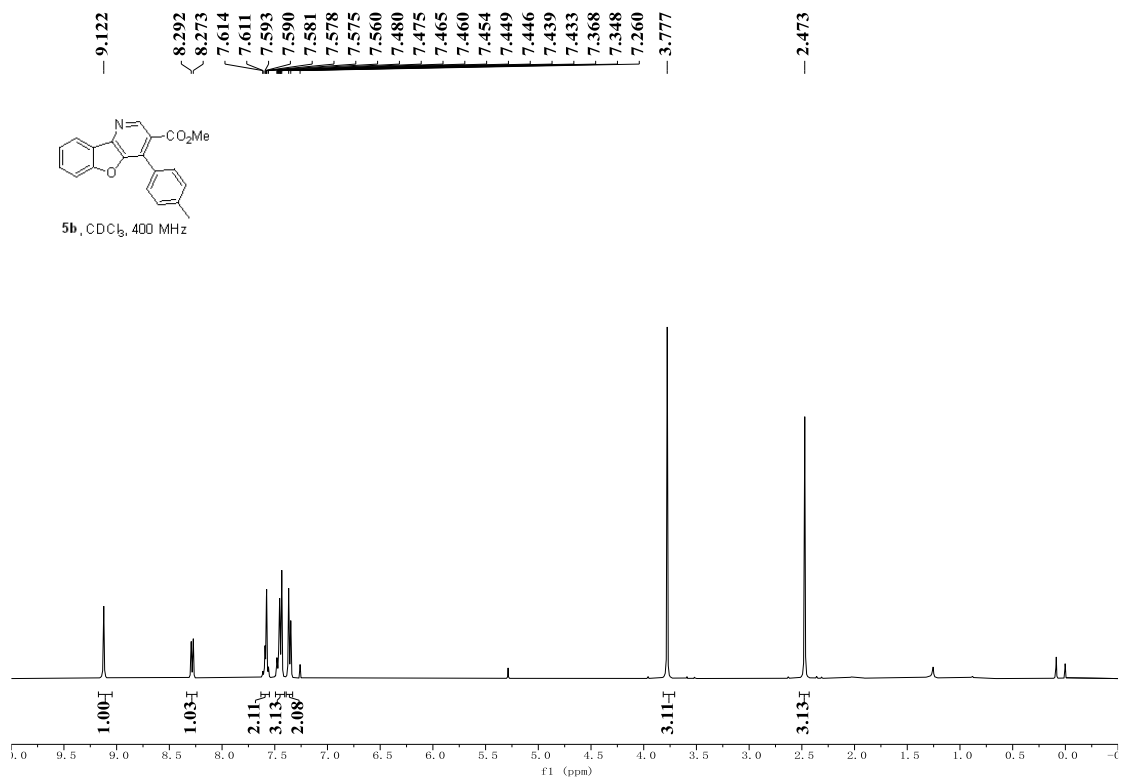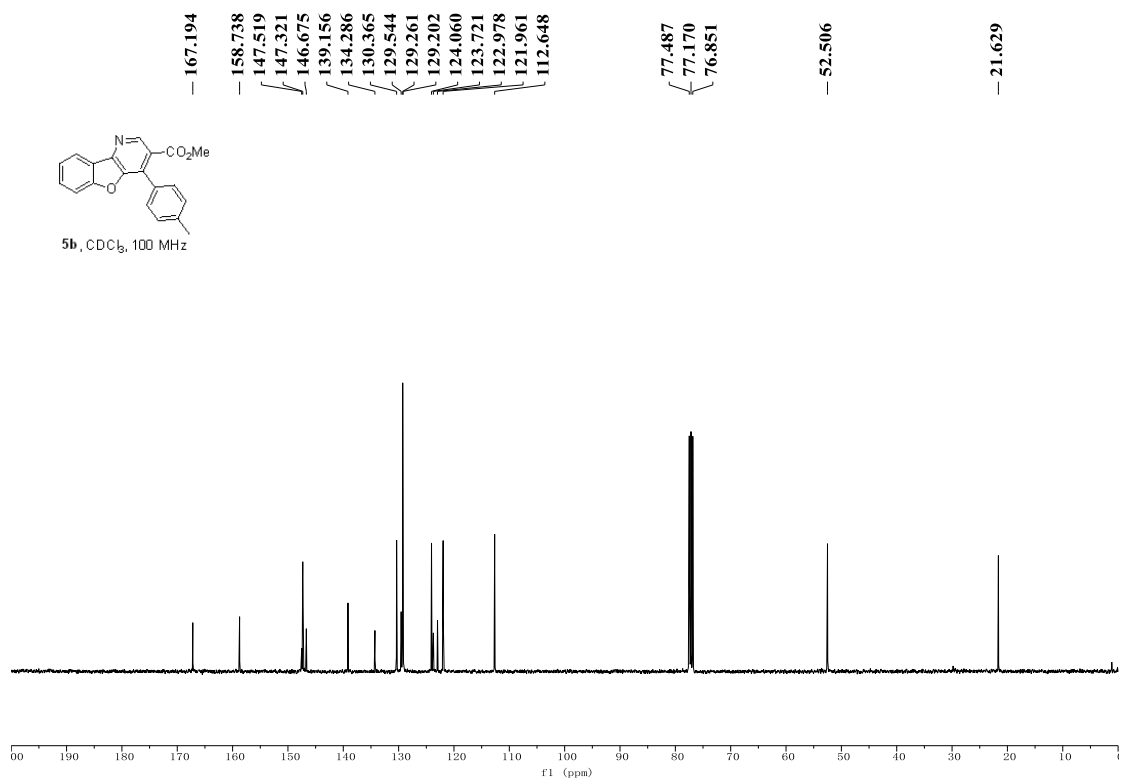

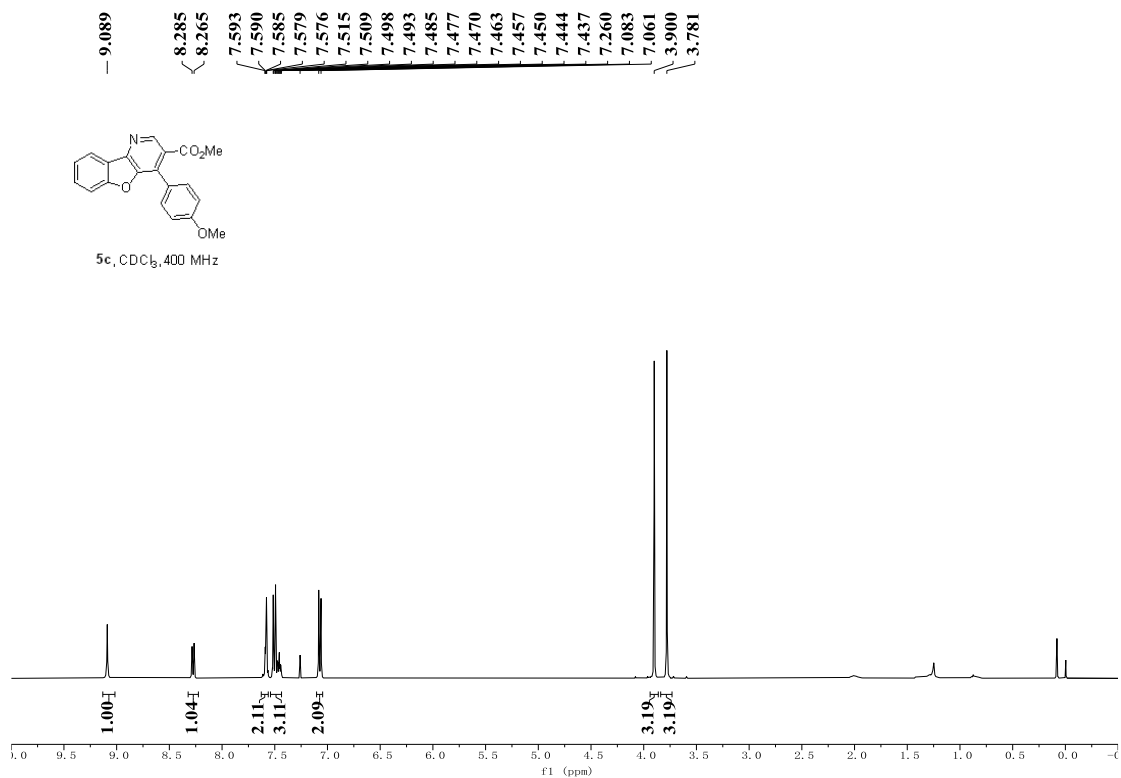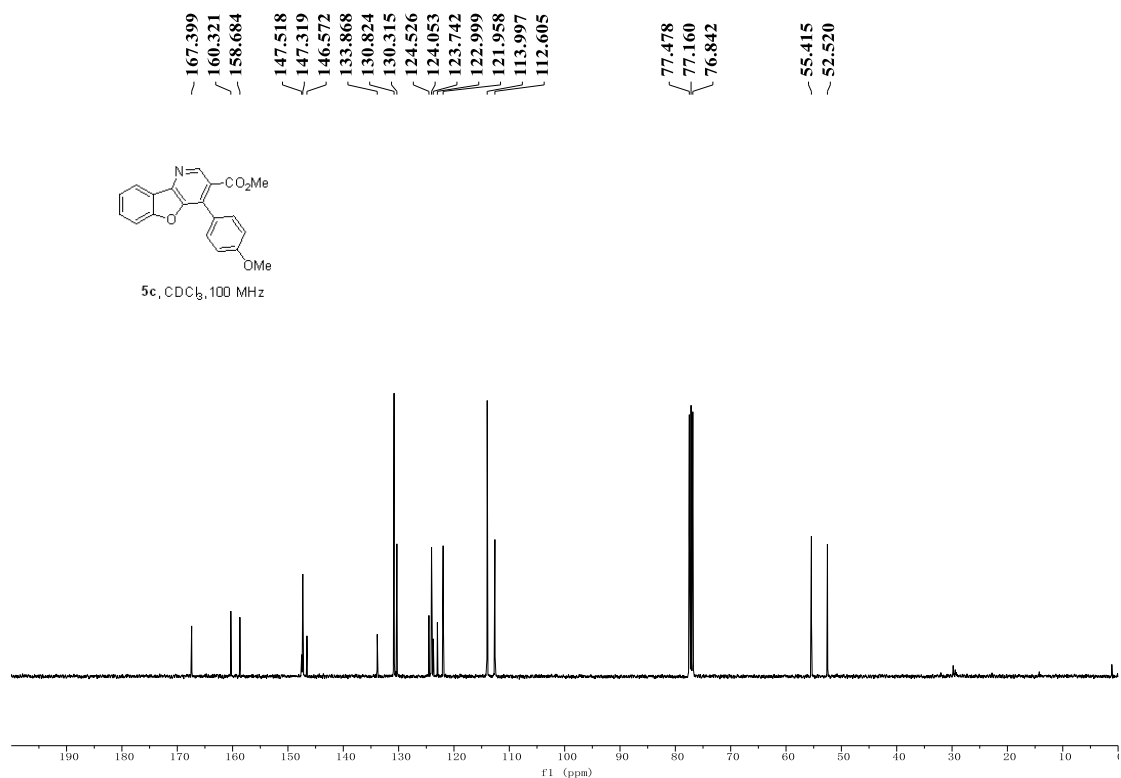

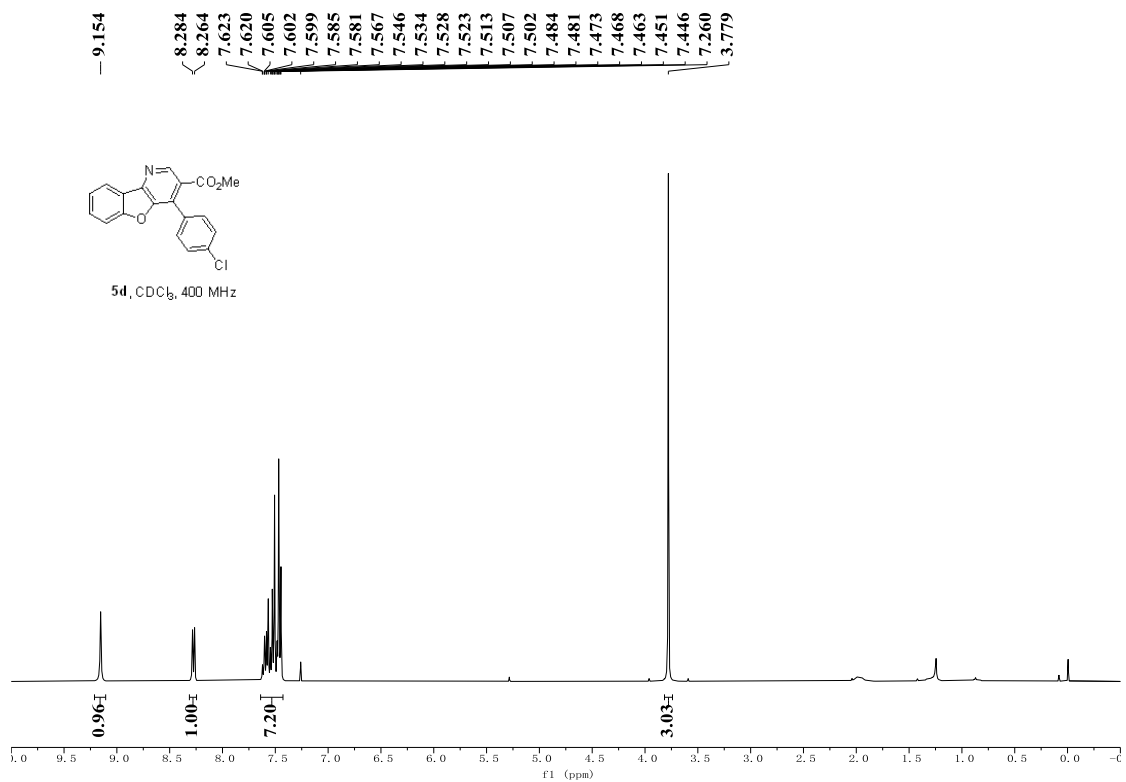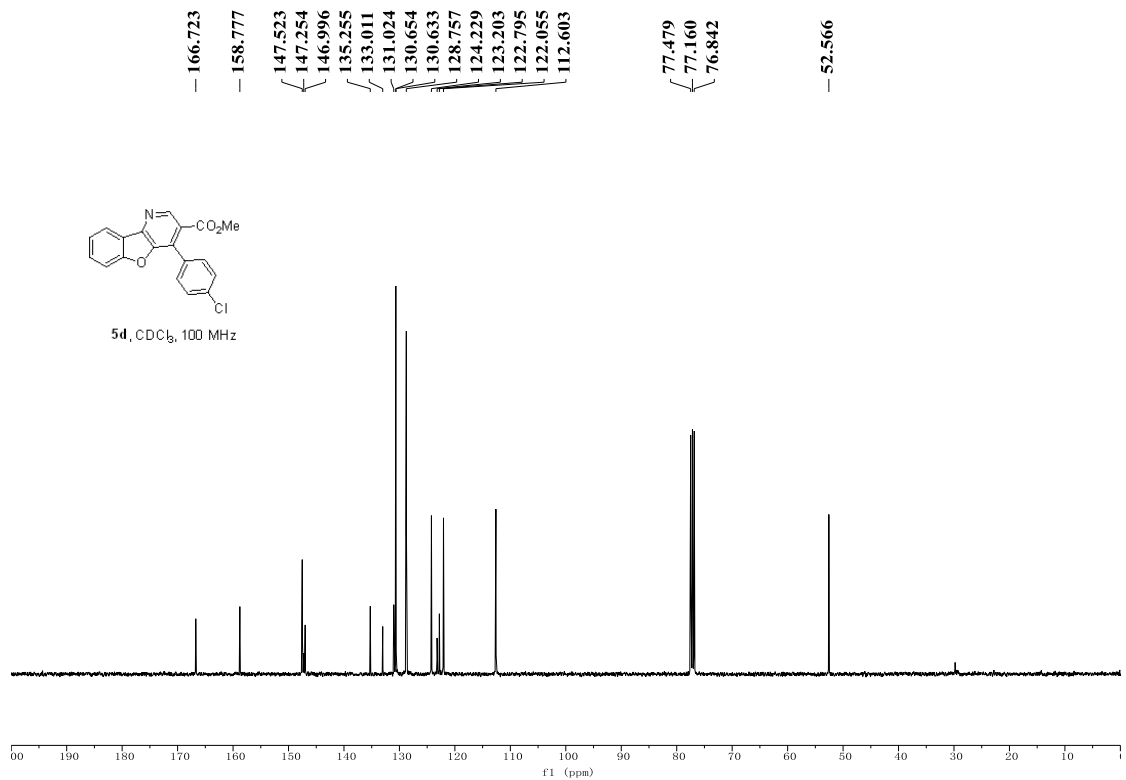

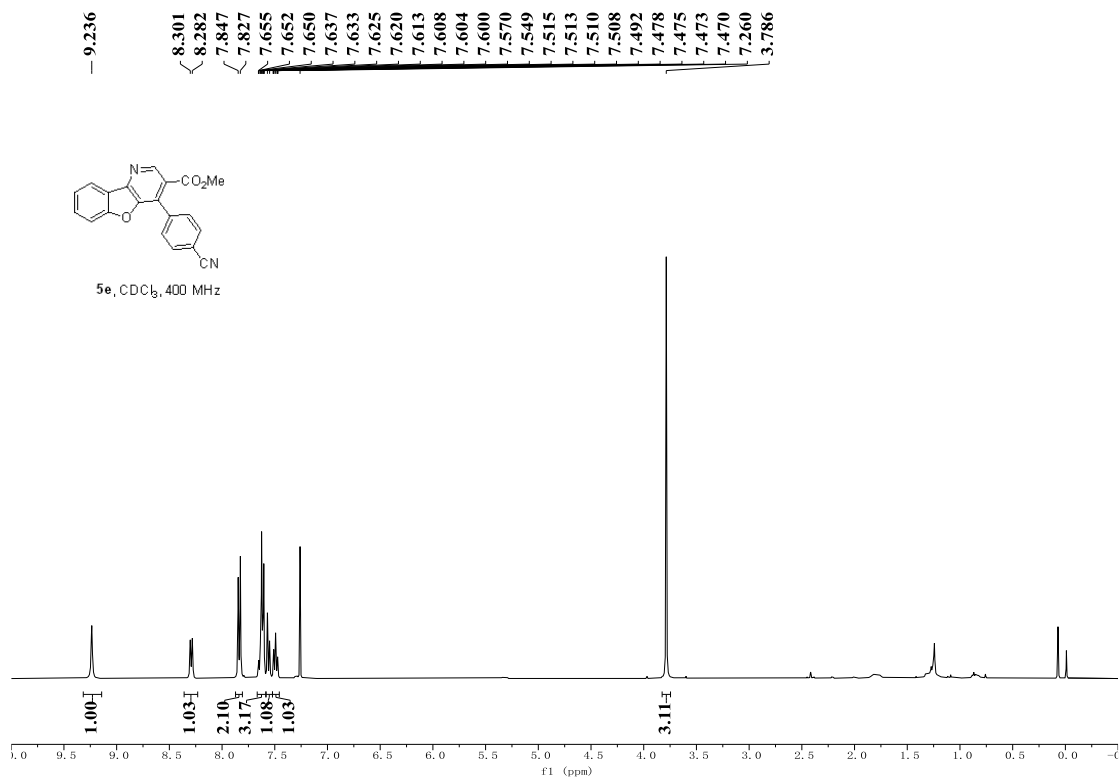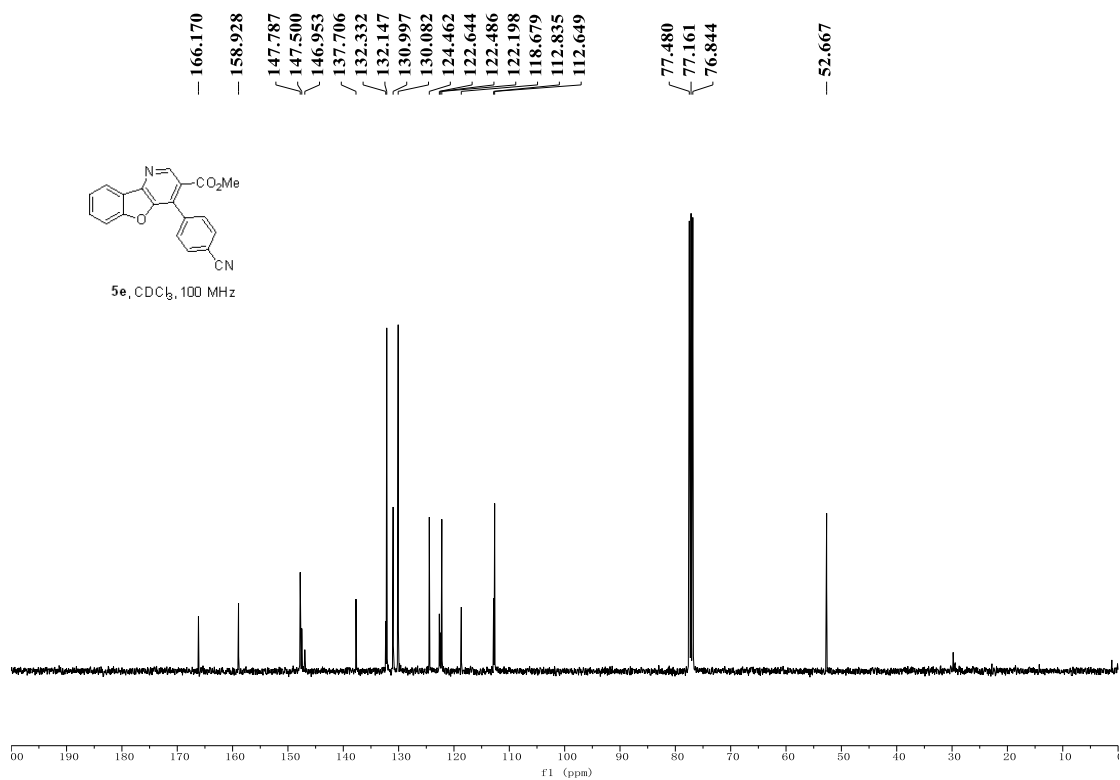

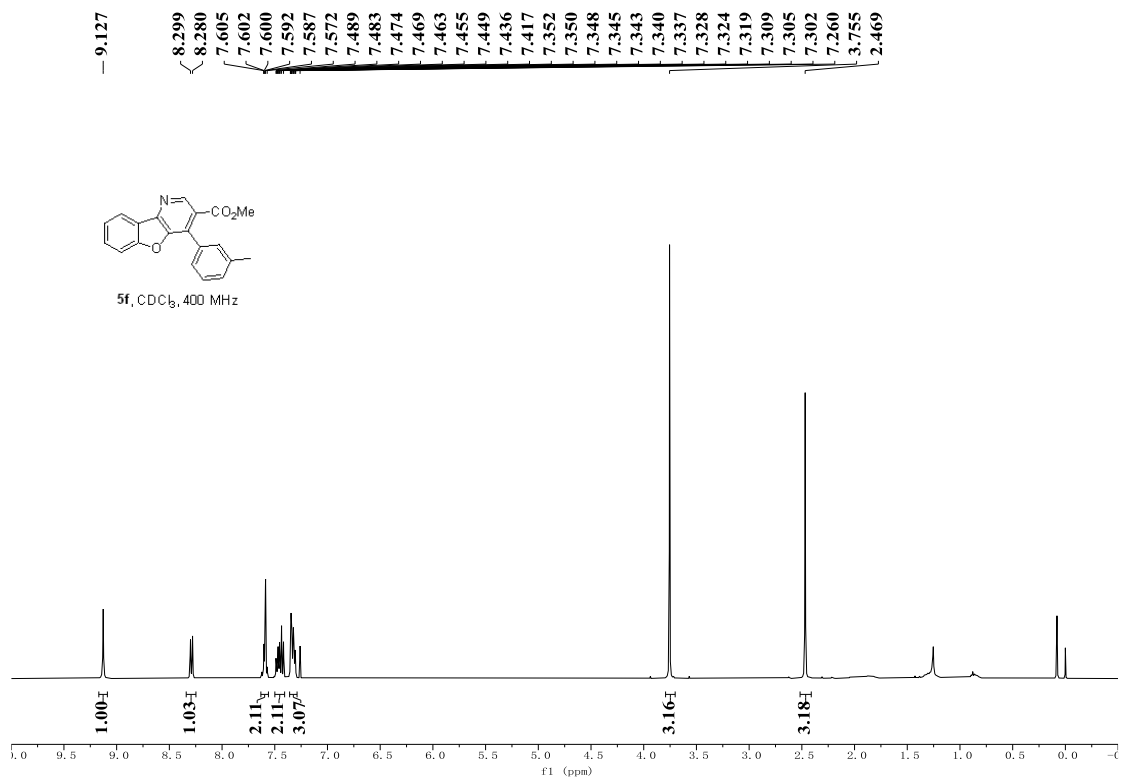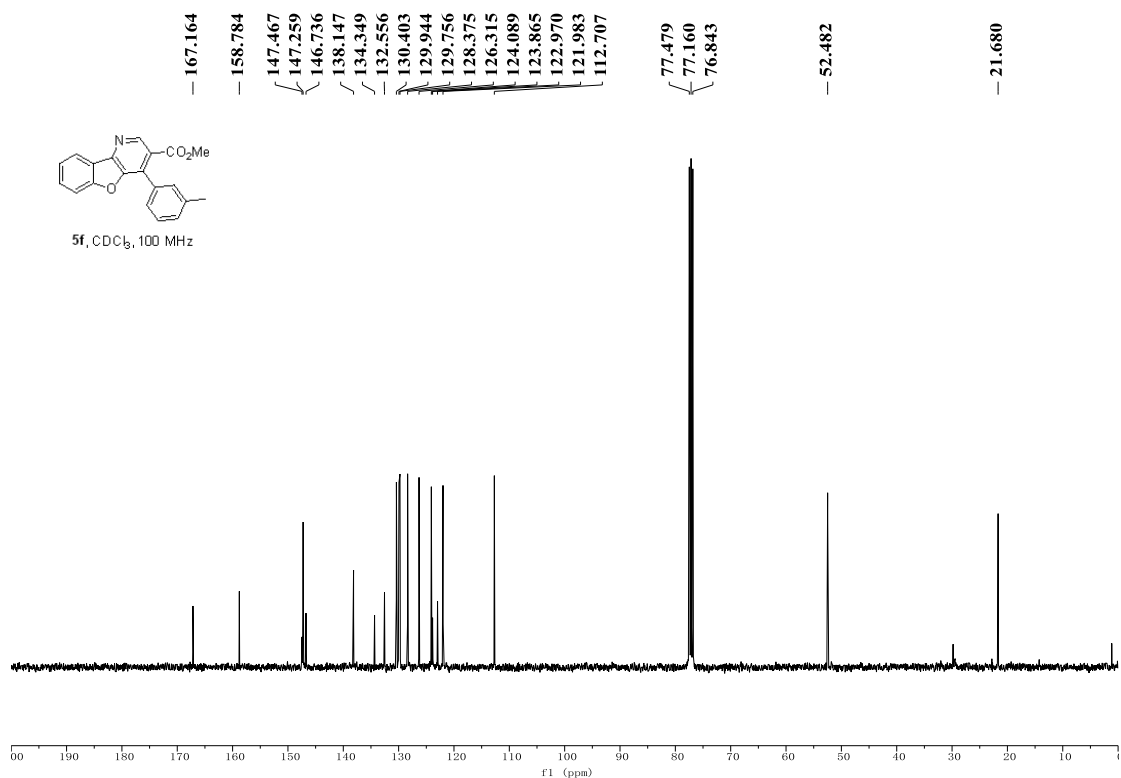

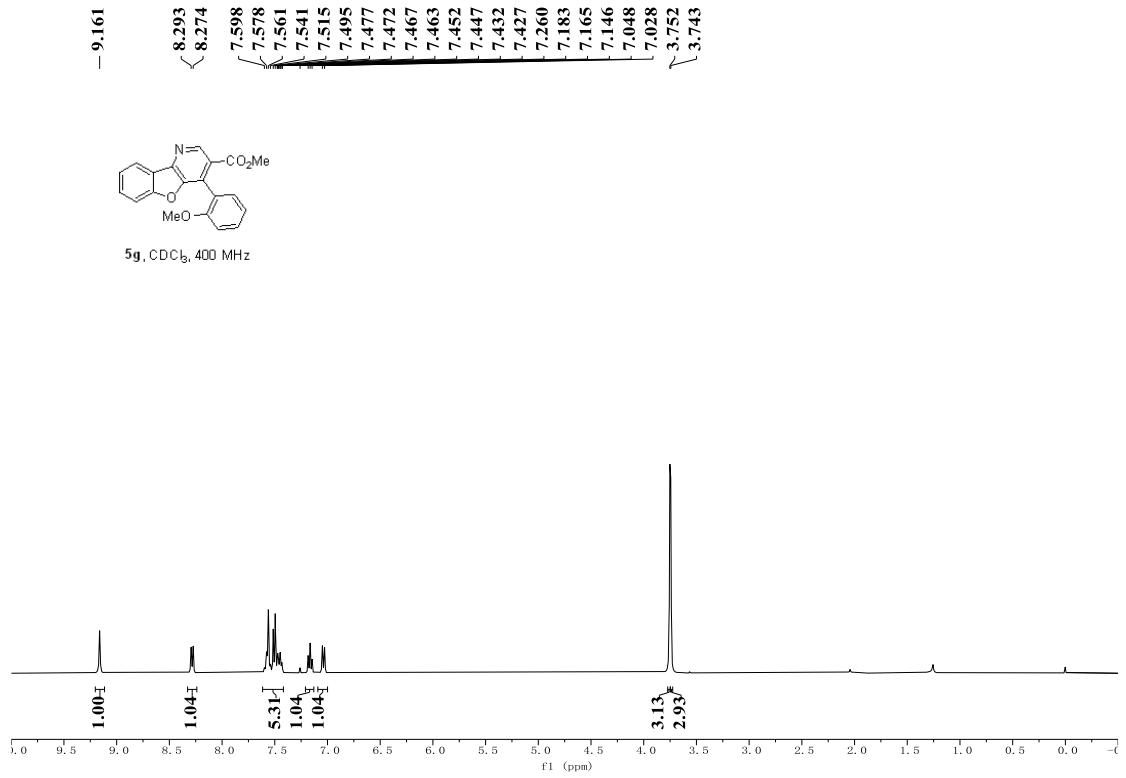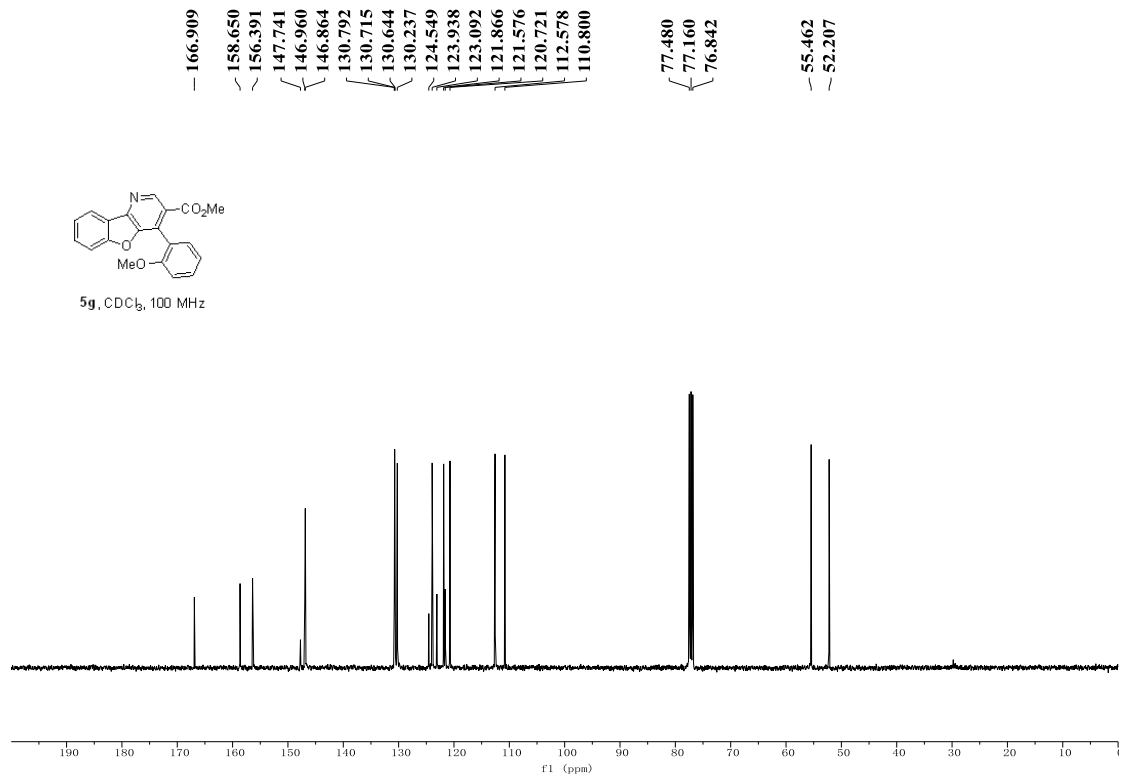

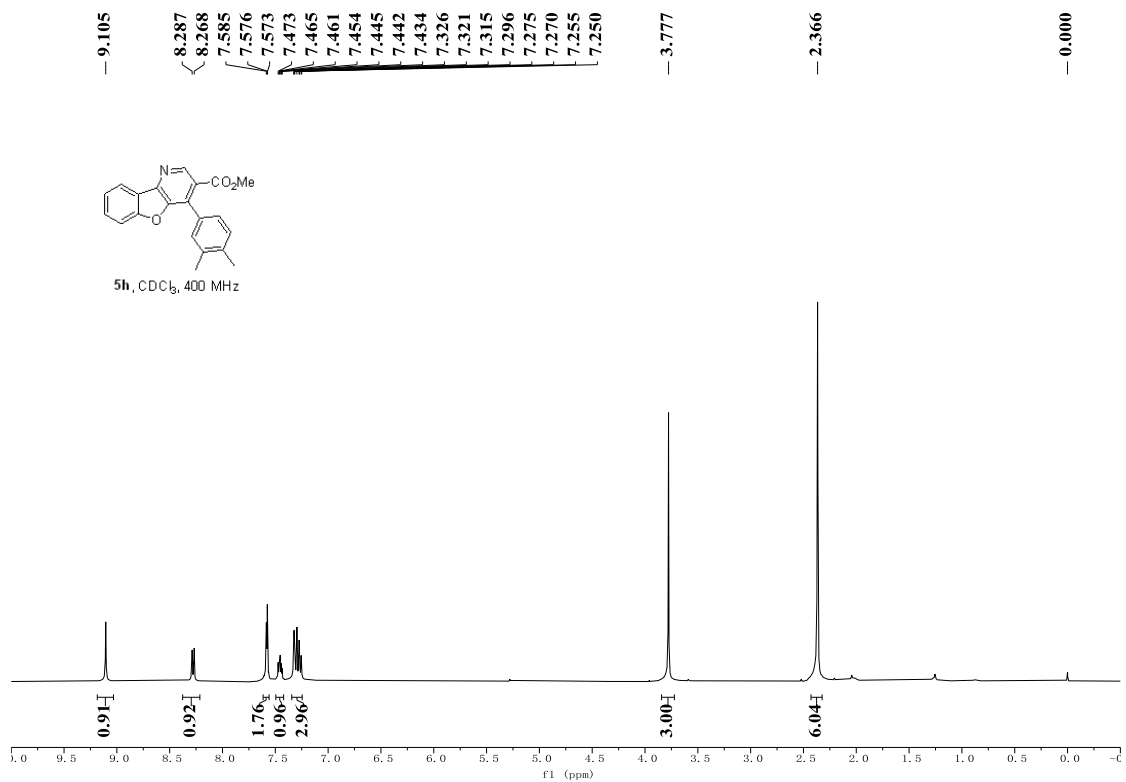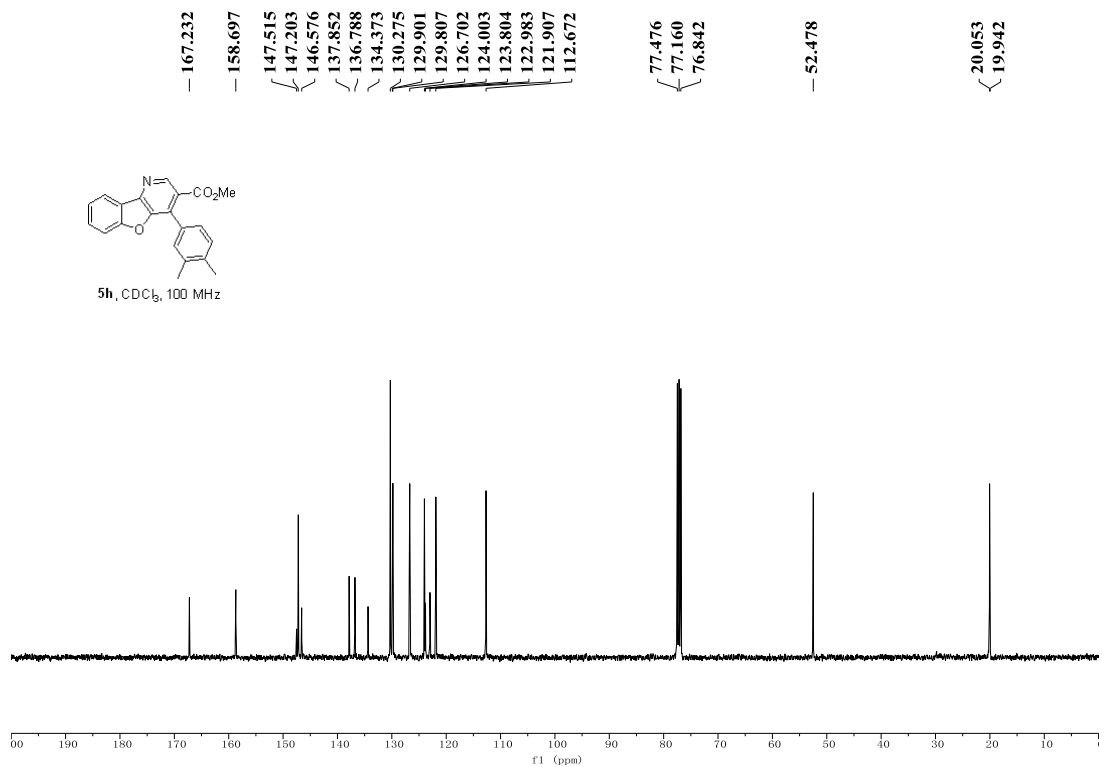



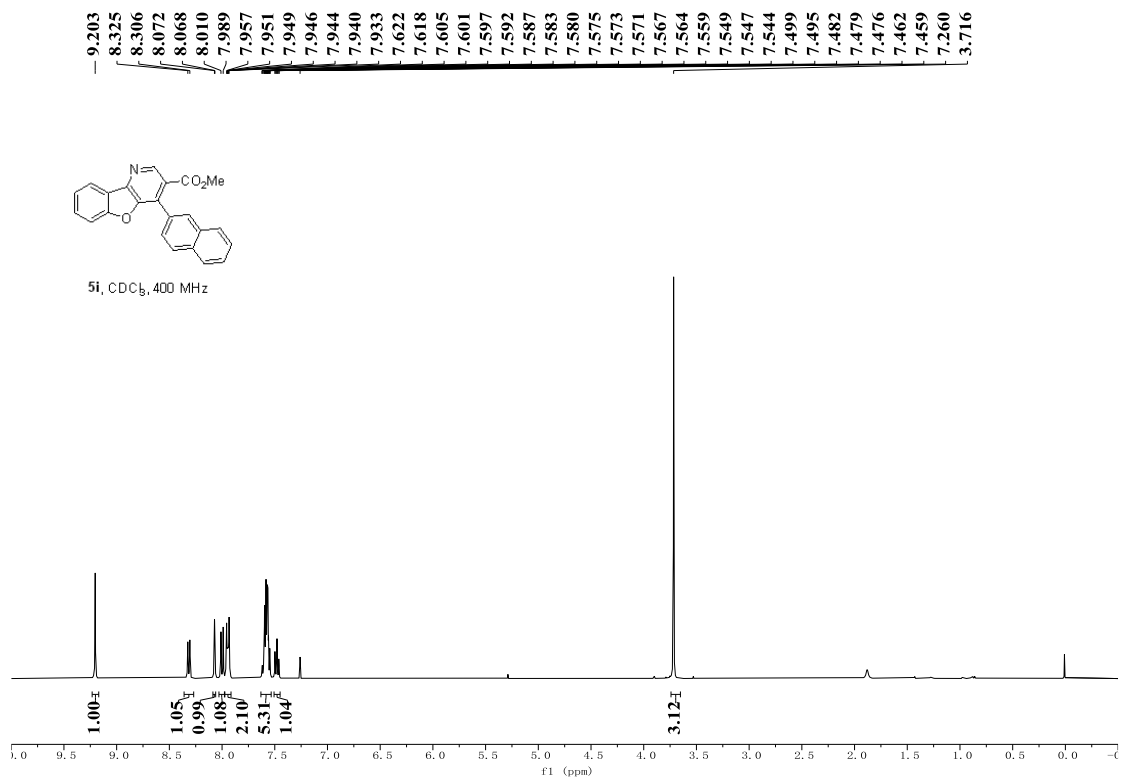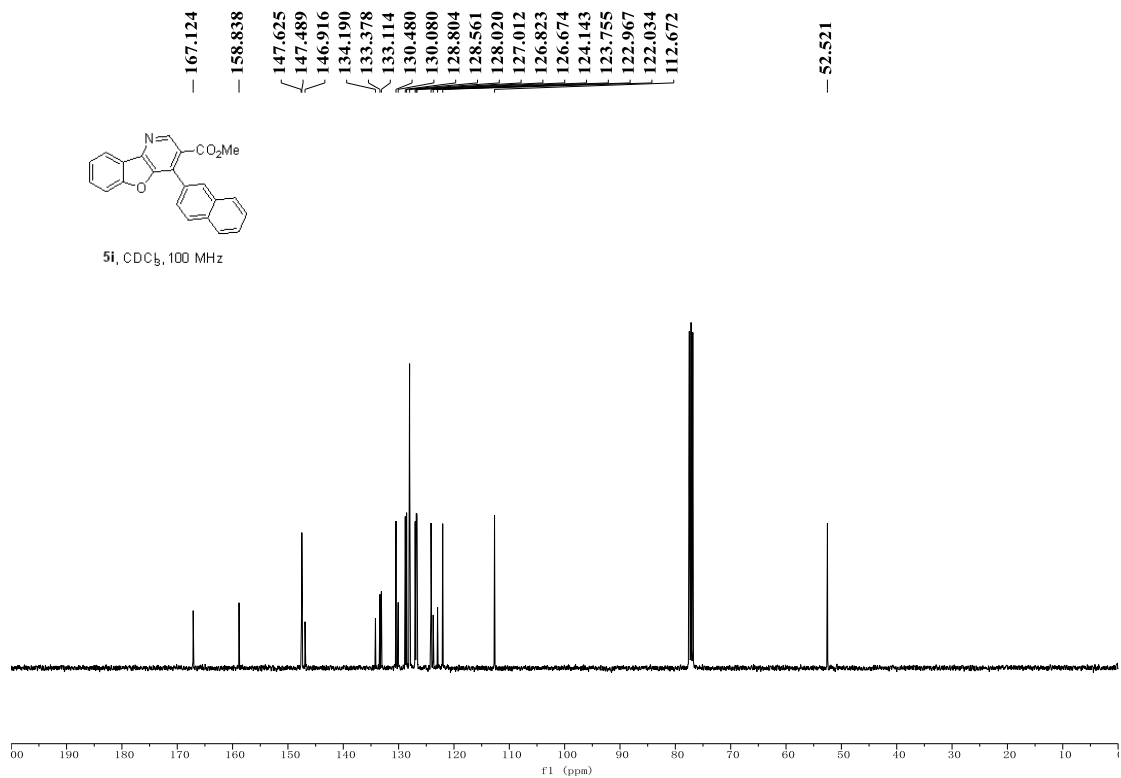

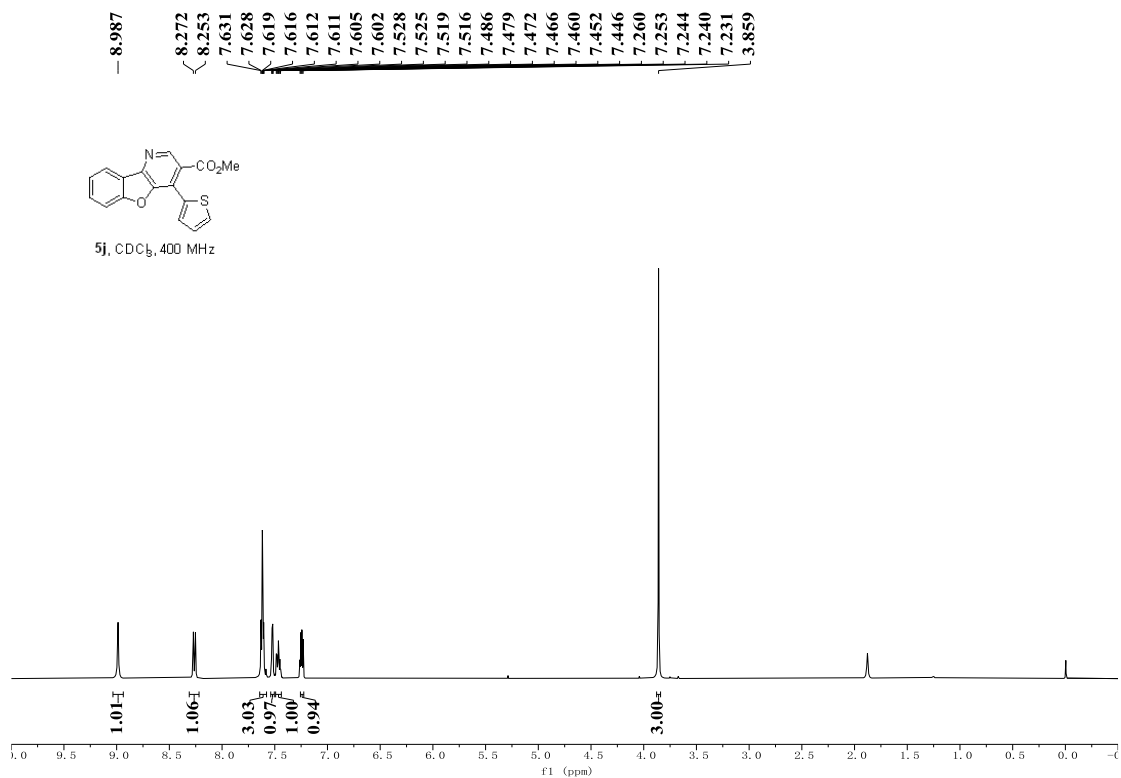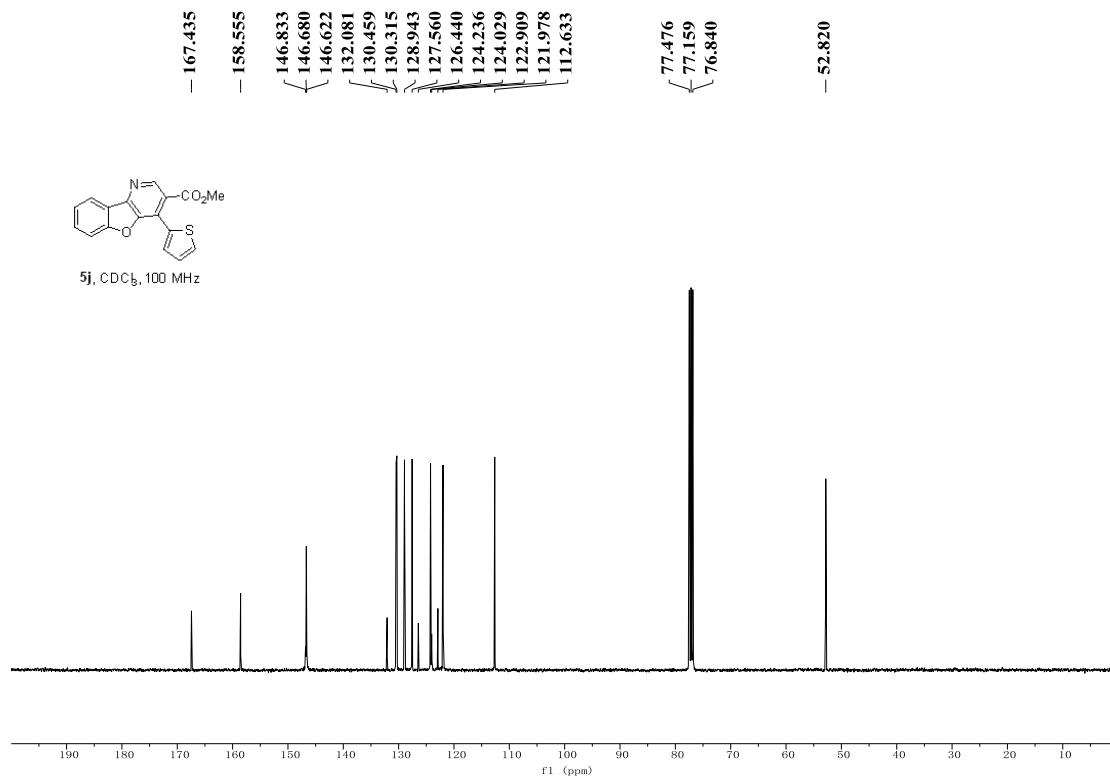

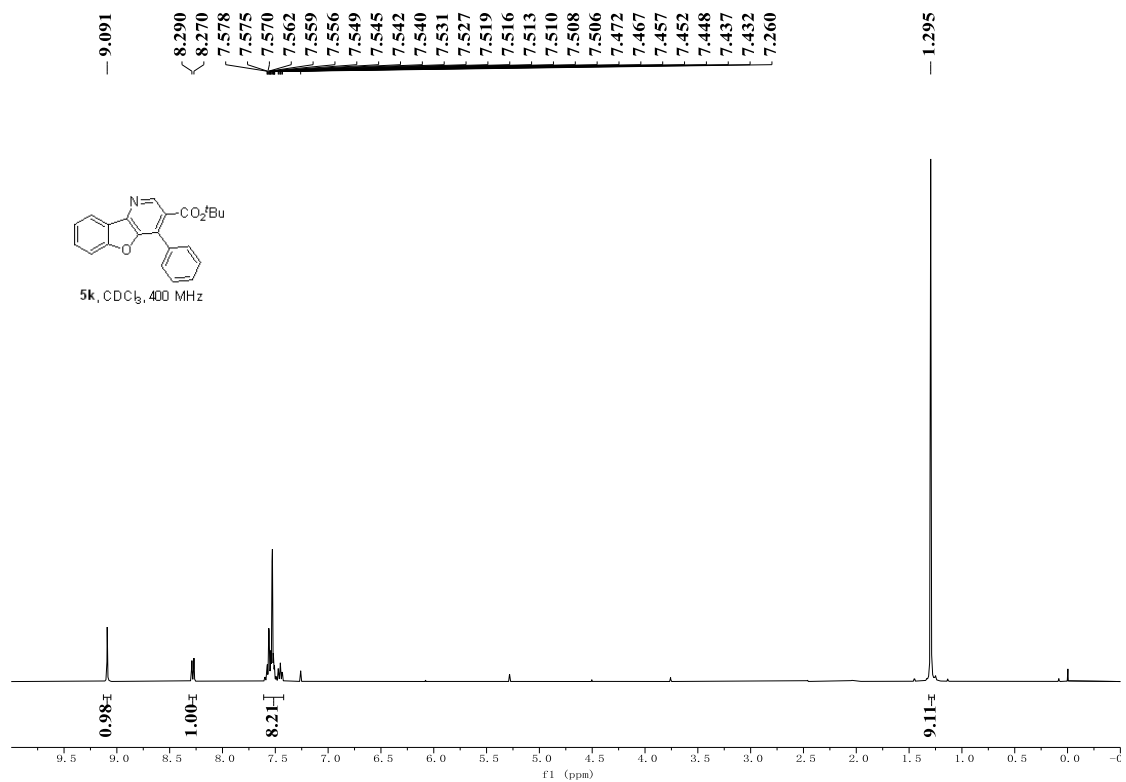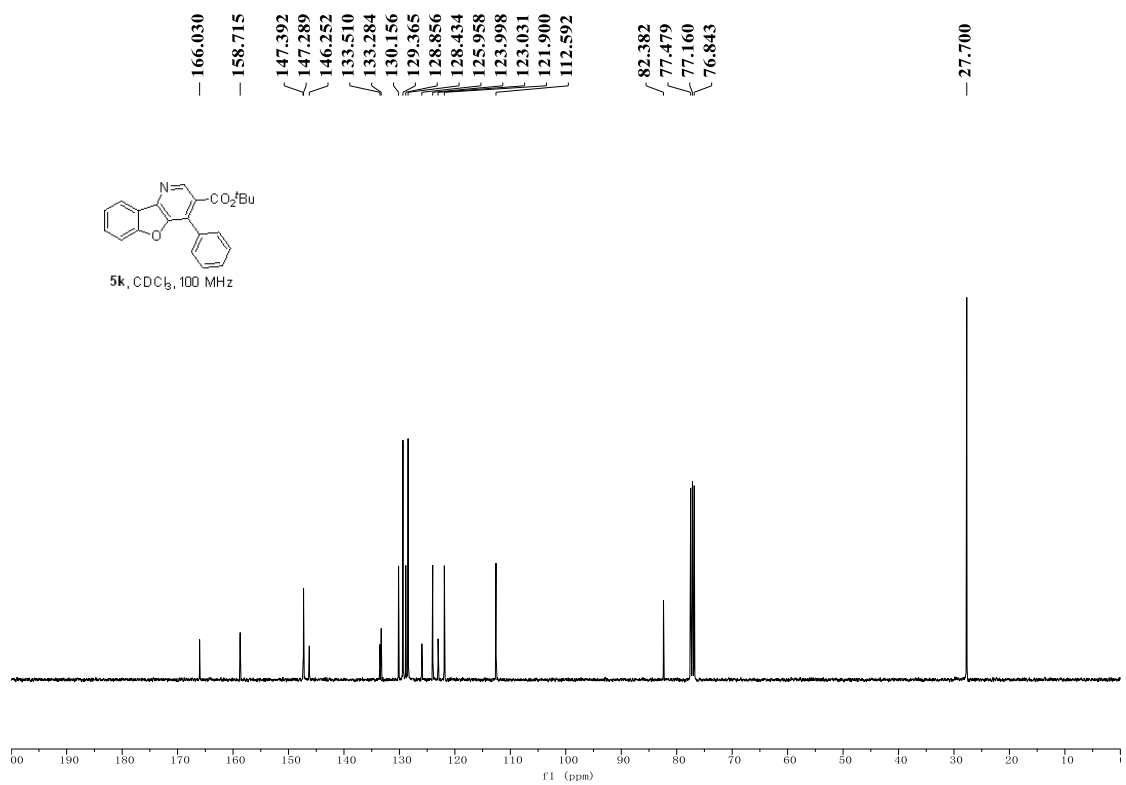

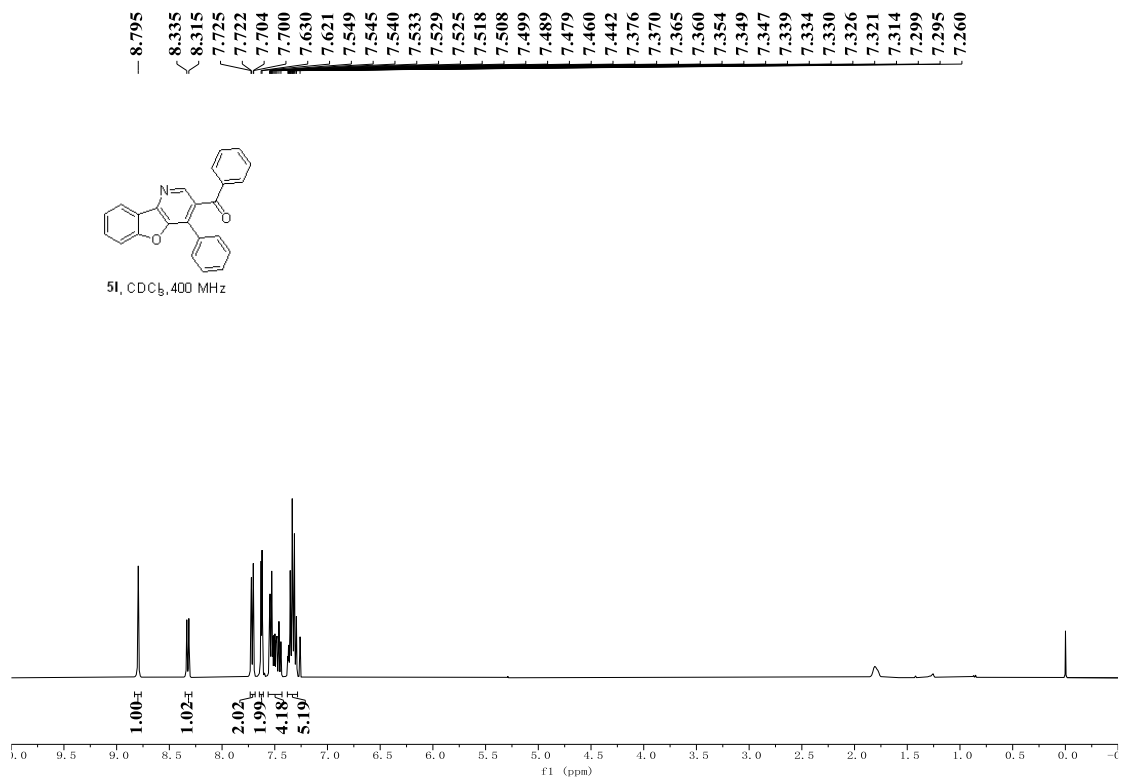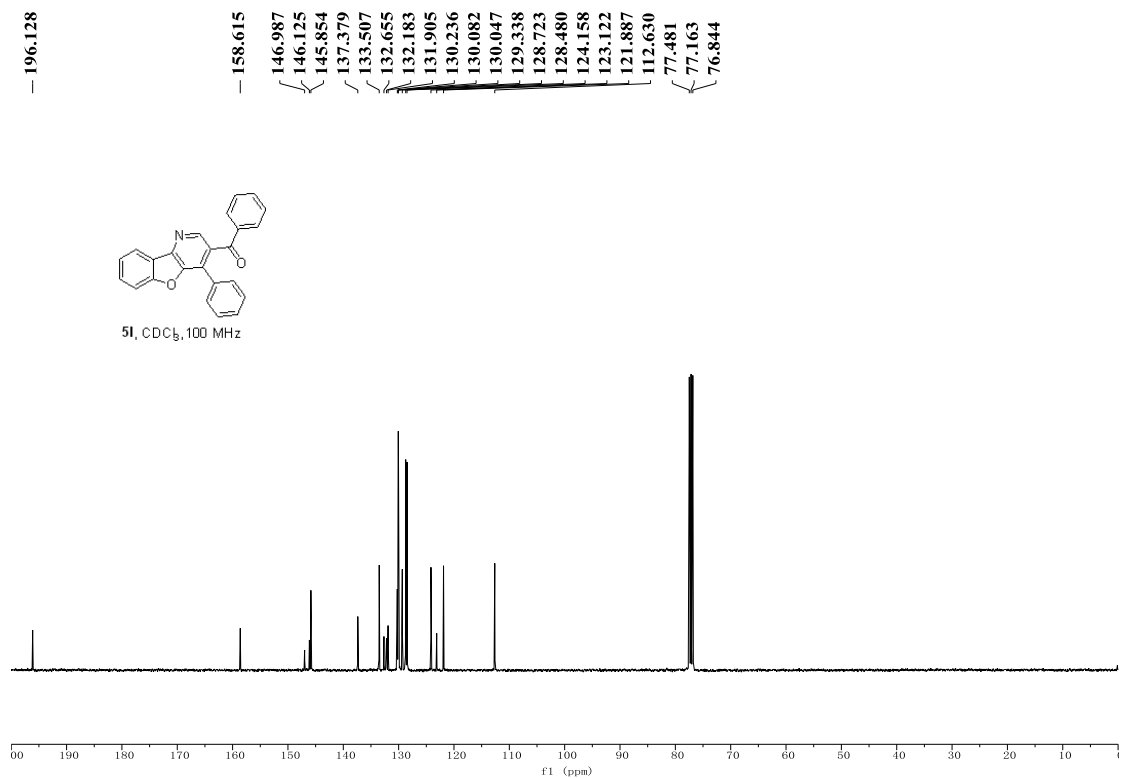

8.313  
8.310  
8.308  
8.293  
8.291  
8.288  
7.606  
7.602  
7.596  
7.591  
7.585  
7.582  
7.580  
7.578  
7.575  
7.572  
7.569  
7.566  
7.559  
7.554  
7.550  
7.548  
7.544  
7.540  
7.537  
7.533  
7.530  
7.524  
7.521  
7.518  
7.514  
7.510  
7.505  
7.499  
7.497  
7.480  
7.466  
7.458  
7.454  
7.447  
7.438  
7.435  
7.426  
7.260  
6.720  
6.717  
6.218  
6.214  
3.786  
3.558

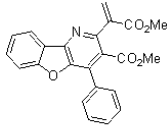

6a, CDCl<sub>3</sub>, 400 MHz

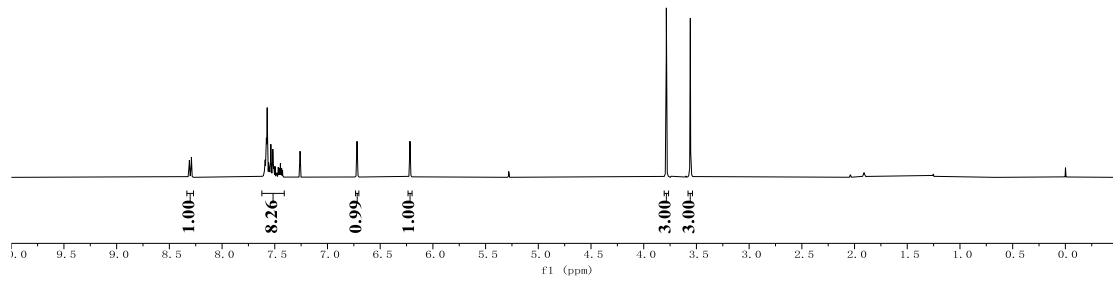

168.054  
166.287  
158.721  
150.440  
146.594  
144.881  
140.864  
132.691  
132.599  
130.860  
130.197  
129.256  
129.141  
128.682  
125.863  
124.031  
122.927  
122.049  
112.528  
77.479  
77.160  
76.843  
52.377  
52.352

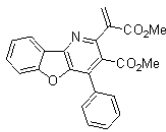

6a, CDCl<sub>3</sub>, 100 MHz

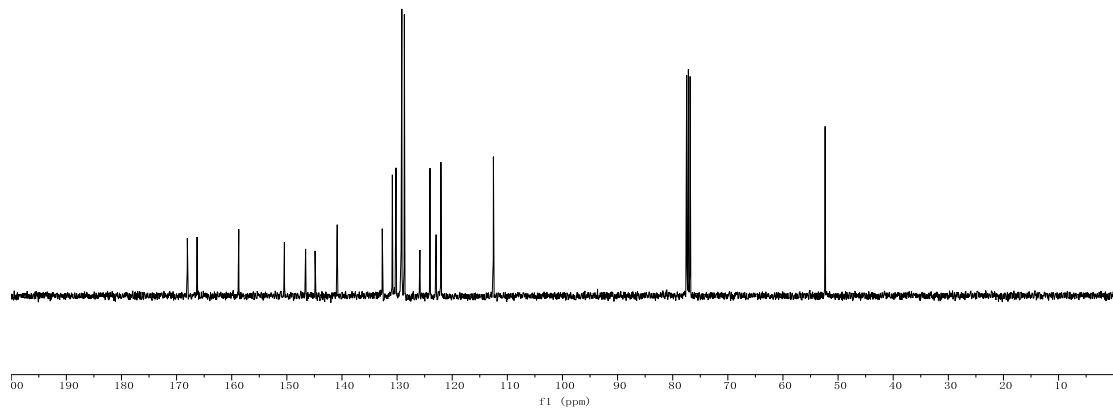

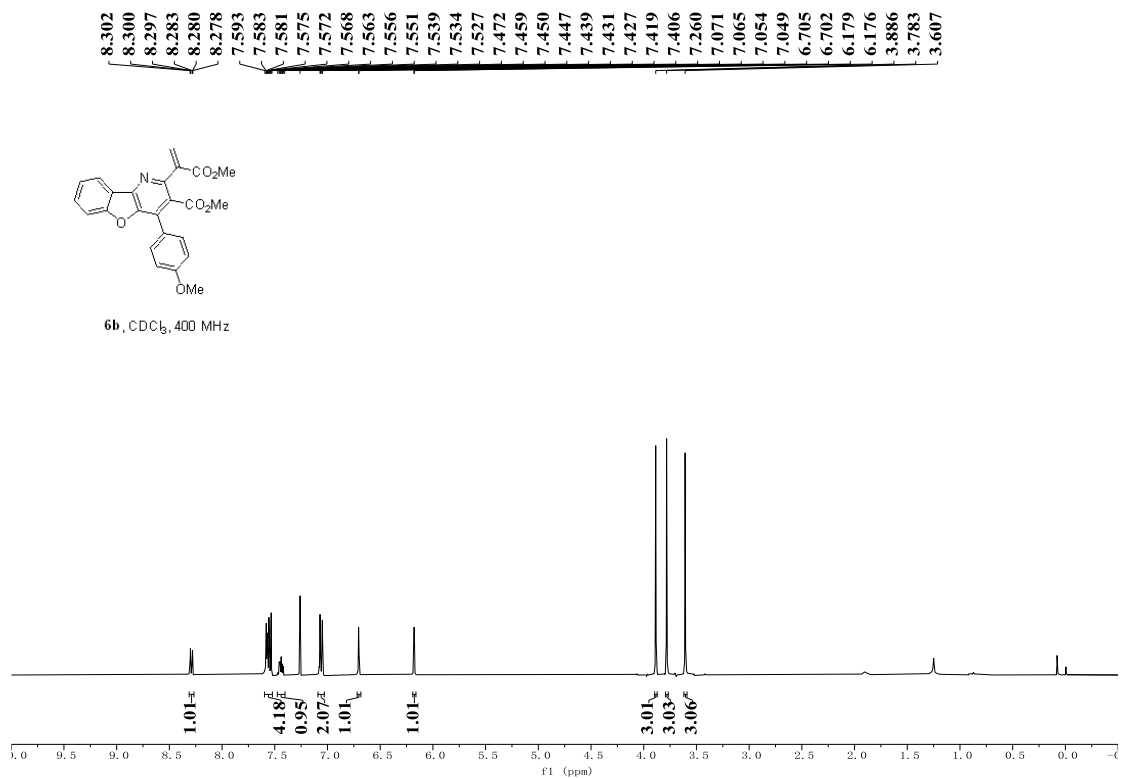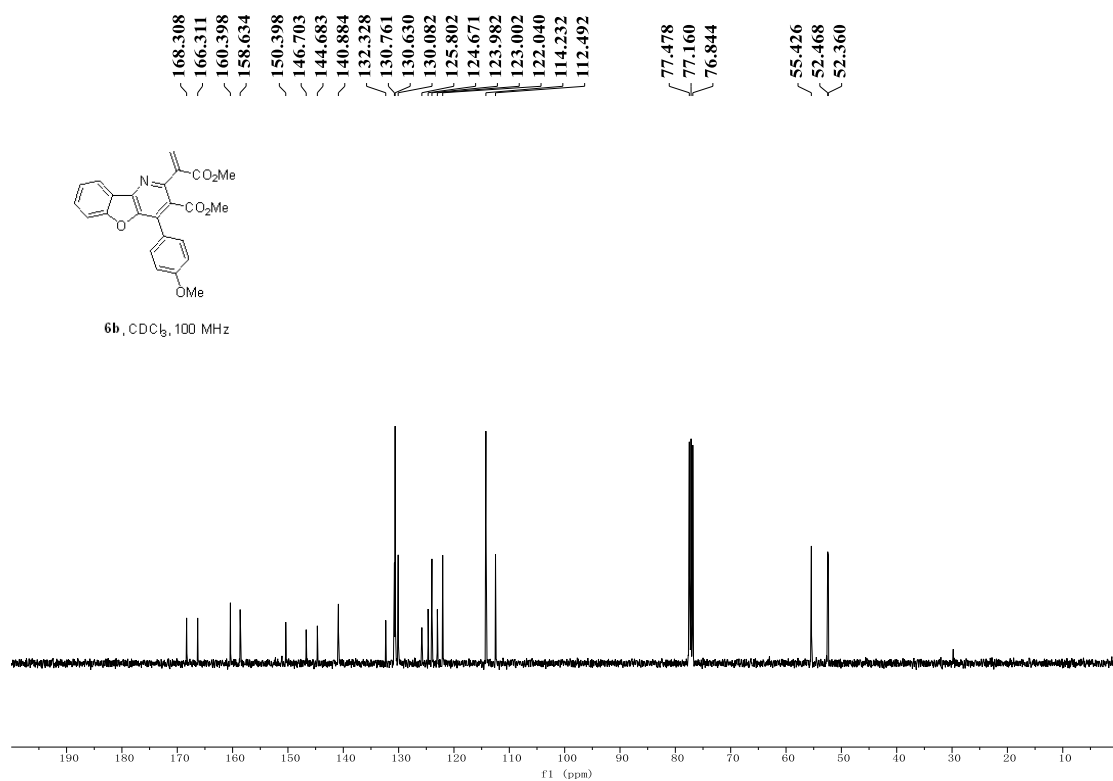

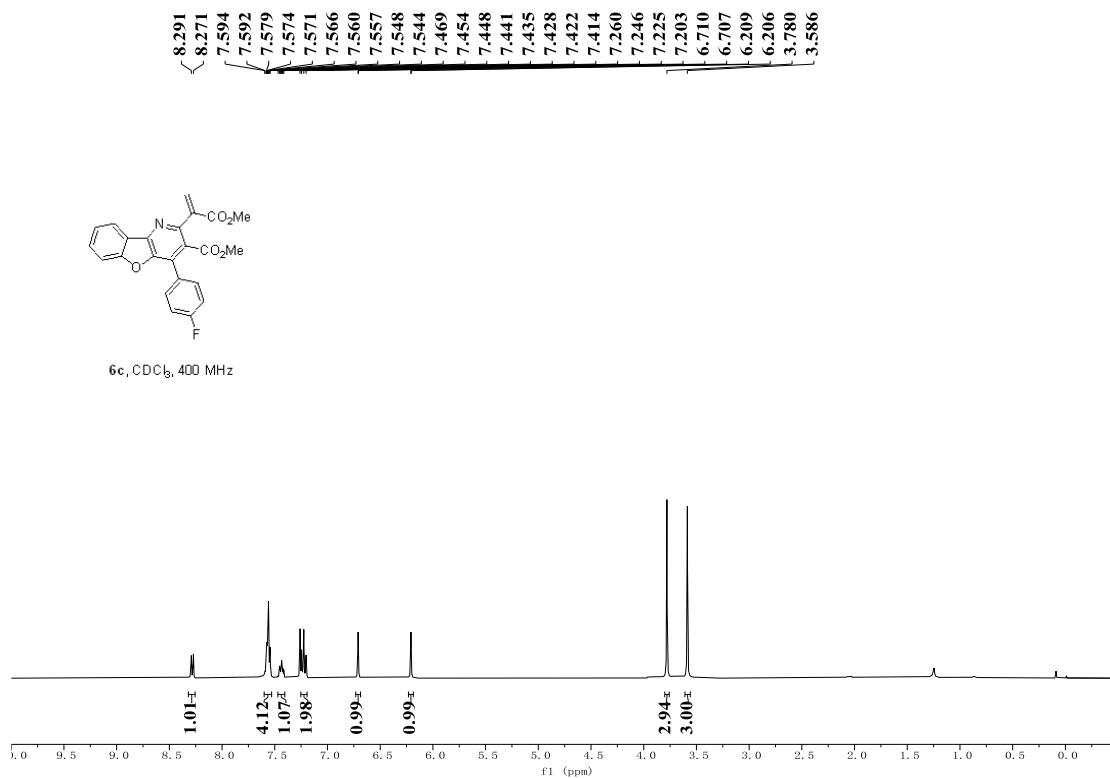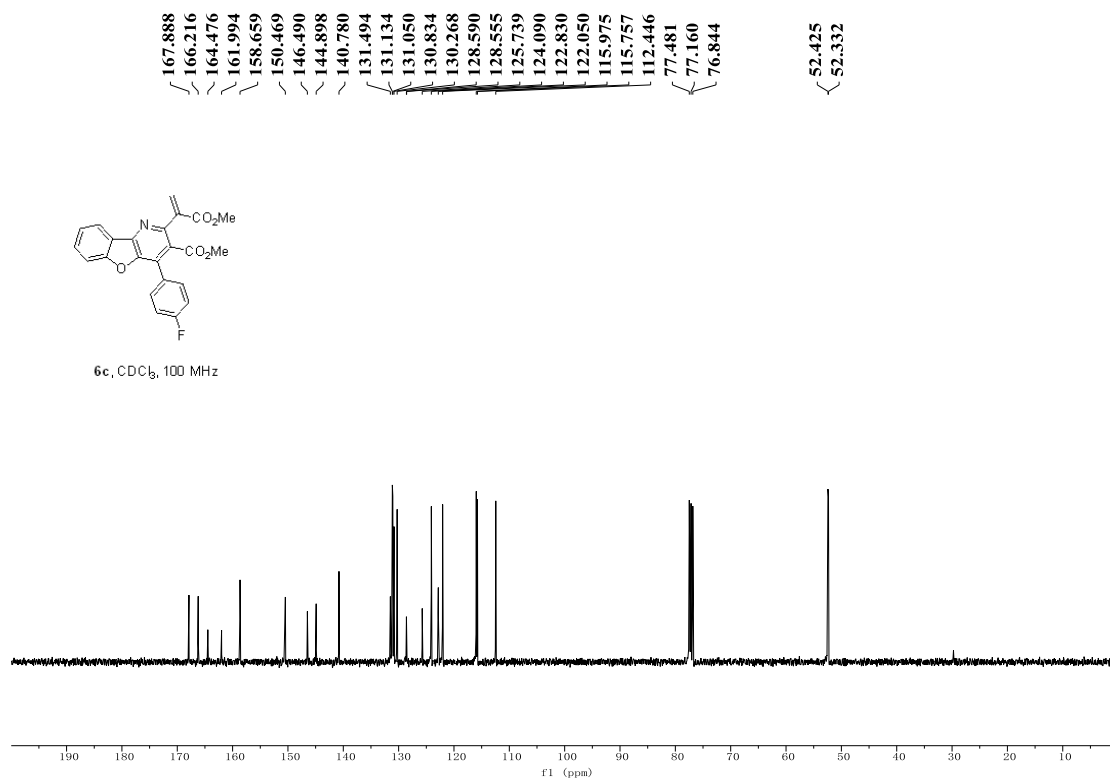

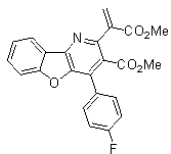

6c, CDCl<sub>3</sub>, 376 MHz

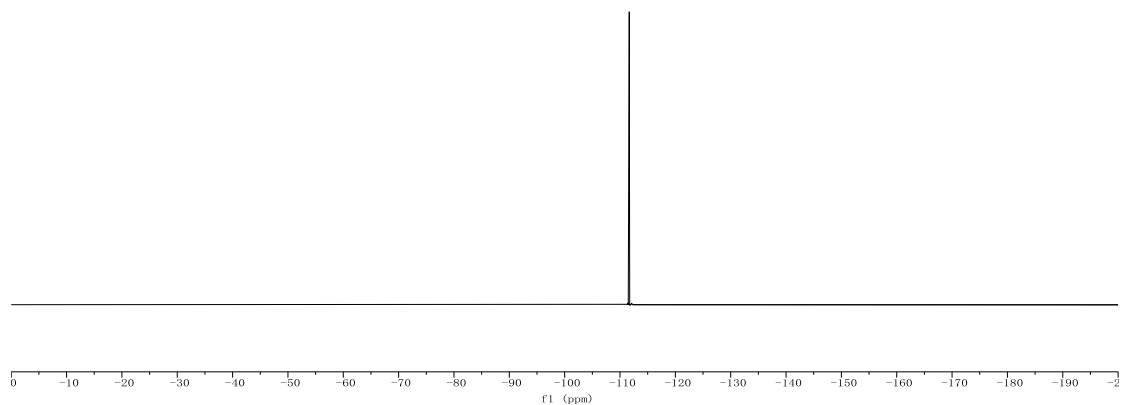

-111.672

8.057  
8.038  
7.605  
7.601  
7.583  
7.566  
7.563  
7.561  
7.558  
7.553  
7.548  
7.546  
7.539  
7.532  
7.527  
7.525  
7.517  
7.468  
7.465  
7.450  
7.448  
7.445  
7.431  
7.428  
7.260  
6.866  
6.847  
5.024  
5.013  
5.002  
4.991  
4.581  
4.558  
4.544  
4.522  
4.132  
4.121  
4.095  
4.084  
3.665  
3.647  
1.861

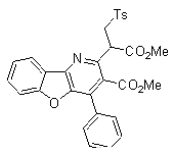

7a, CDCl<sub>3</sub>, 400 MHz

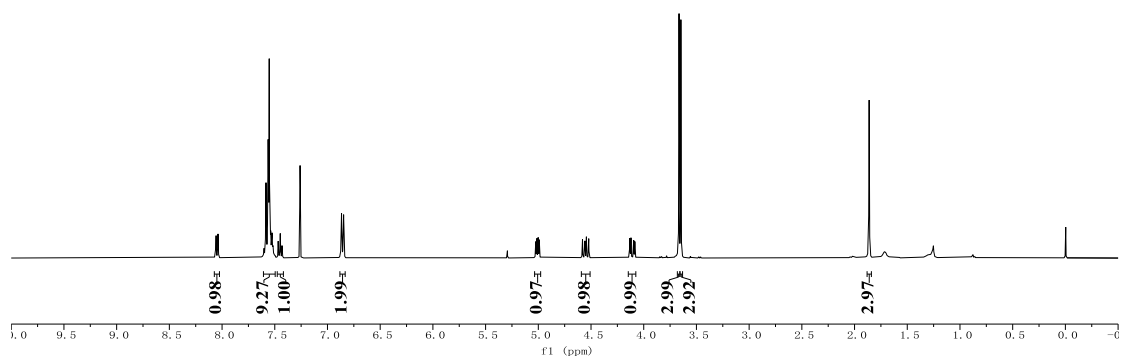

0.98±

9.27±

1.00±

1.99±

0.97±

0.98±

0.99±

2.99±

2.92±

2.97±



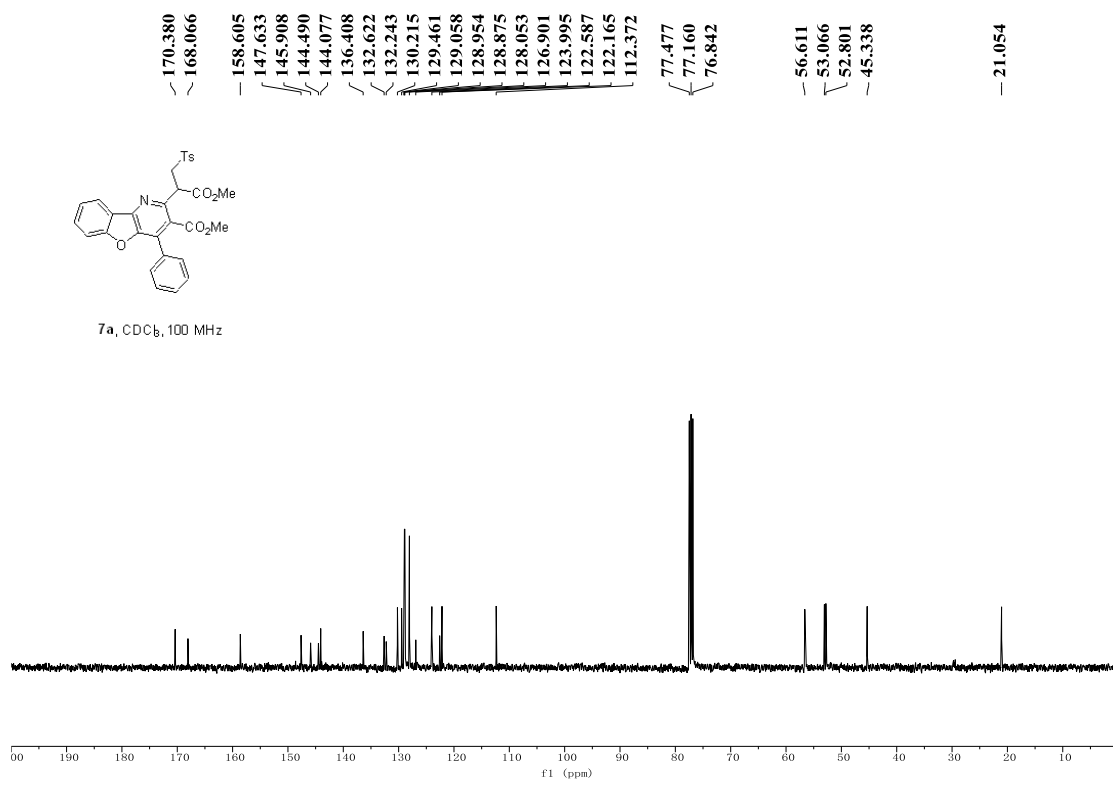

Supplement: d1cc02477a1.pdf [file d1cc02477a1.pdf]
